# Supplementary material for: Structural and Luminescence Properties of Cu(I)X-Quinoxaline under High Pressure (X = Br, I)
Source: MDPI journal article supplement (doi:10.3390/cryst13010100), 2023-01-05
Supplement: s1 [file s1]

# Supporting Information

## Structural and luminescence properties of Cu(I)X-Quinoxaline under High Pressure (X=Br, I)

**Javier Gonzalez-Platas <sup>1,\*</sup>, Ulises R. Rodriguez-Mendoza <sup>2</sup>, Amagoia Aguirrechu-Cameron <sup>3</sup>, Rita R. Hernandez-Molina <sup>4</sup>, Robin Turnbull <sup>5</sup>, Placida Rodriguez-Hernandez <sup>2</sup> and Alfonso Muñoz <sup>2</sup>**

<sup>1</sup> Instituto Universitario de Estudios Avanzados en Física Atómica, Molecular y Fotónica (IUDEA), MALTA Consolider Team, Departamento de Física, Universidad de La Laguna, E38204 La Laguna, Tenerife, Spain

<sup>2</sup> Instituto de Materiales y Nanotecnología (IMN), MALTA Consolider Team, Departamento de Física, Universidad de La Laguna, E38204 La Laguna, Tenerife, Spain

<sup>3</sup> Departamento de Física, Universidad de La Laguna, E38204 La Laguna, Tenerife, Spain

<sup>4</sup> Instituto Universitario de Bioorgánica Antonio González, Departamento de Química, Unidad Departamental de Química Inorgánica, Universidad de La Laguna, E38204 La Laguna, Tenerife, Spain

<sup>5</sup> Departamento de Física Aplicada, Instituto Ciencia de Materiales, MALTA Consolider Team, Universidad de Valencia, E46100 Burjassot, Valencia, Spain

## Experimental Section

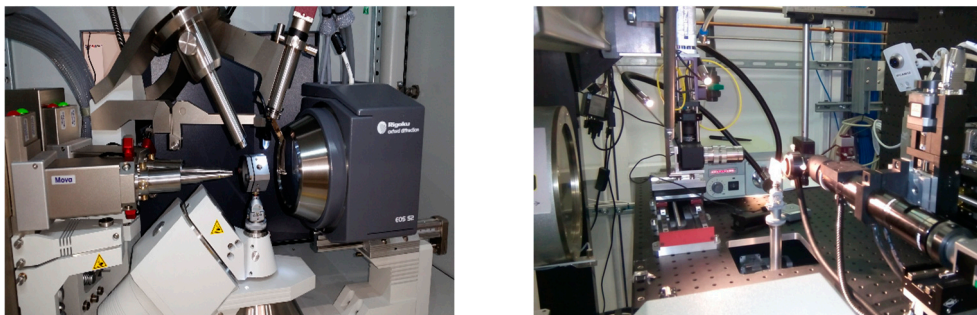

**Figure S1.** Instrumental setup used for HP experiments. On the left, a SuperNOVA diffractometer with EoS CCD detector. On the right, HP Station in MSPD-BL04 (ALBA Synchrotron) with Rayonix SX165 CCD Detector.

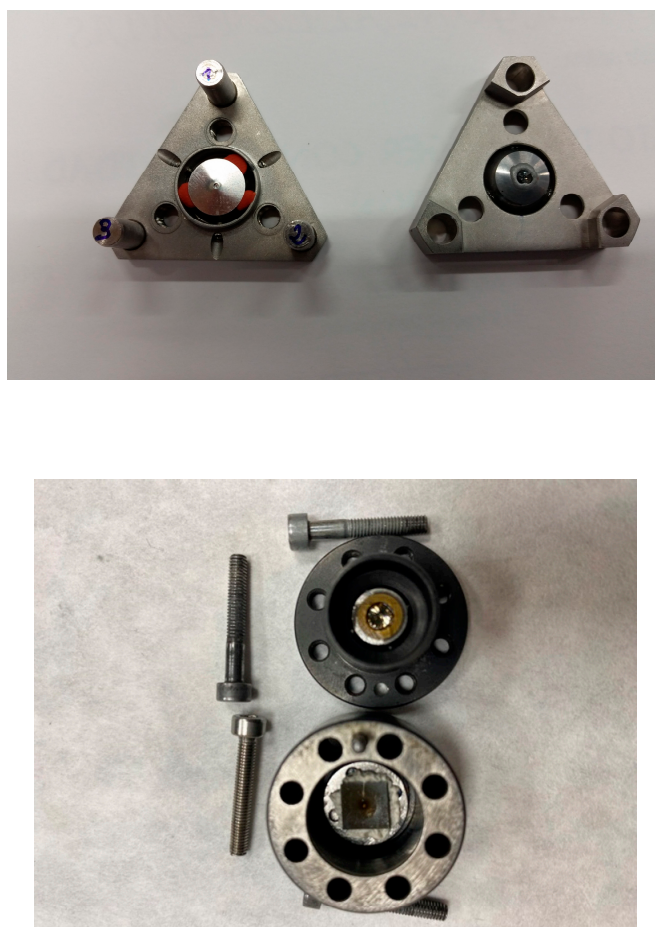

**Figure S2.** Bragg-Mini DAC (Almax EasyLab company) with 500 $\mu$ m diameter in the culets of diamonds (top). Paderborn Mini DAC with 400 $\mu$ m diameter in the culets of diamonds (bottom)

## Crystal Data

**Table S1-1.** Crystal data and structure refinements for (CuBr)<sub>2</sub>-Quin sample at different pressures (0.00-4.67GPa) at room temperature.

|                             | <b>0.00 GPa</b>                                                              | <b>0.22 GPa</b>                                                              | <b>0.72GPa</b>                                                               | <b>1.17 GPa</b>                                                              |
|-----------------------------|------------------------------------------------------------------------------|------------------------------------------------------------------------------|------------------------------------------------------------------------------|------------------------------------------------------------------------------|
| CCDC                        | 2226261                                                                      | 2226239                                                                      | 2226259                                                                      | 2226258                                                                      |
| Formula                     | C <sub>8</sub> H <sub>6</sub> N <sub>2</sub> Cu <sub>2</sub> Br <sub>2</sub> | C <sub>8</sub> H <sub>6</sub> Br <sub>2</sub> Cu <sub>2</sub> N <sub>2</sub> | C <sub>8</sub> H <sub>6</sub> Br <sub>2</sub> Cu <sub>2</sub> N <sub>2</sub> | C <sub>8</sub> H <sub>6</sub> Br <sub>2</sub> Cu <sub>2</sub> N <sub>2</sub> |
| $D_{calc}/\text{g cm}^{-3}$ | 2.806                                                                        | 2.842                                                                        | 2.926                                                                        | 2.993                                                                        |
| $\mu/\text{mm}^{-1}$        | 12.355                                                                       | 12.517                                                                       | 12.886                                                                       | 13.179                                                                       |
| Formula Weight              | 417.05                                                                       | 417.05                                                                       | 417.05                                                                       | 417.05                                                                       |
| Colour                      | brown                                                                        | brown                                                                        | brown                                                                        | brown                                                                        |
| Shape                       | plate-shaped                                                                 | plate-shaped                                                                 | plate-shaped                                                                 | plate-shaped                                                                 |
| Size/mm <sup>3</sup>        | 0.14×0.05×0.03                                                               | 0.14×0.05×0.04                                                               | 0.14×0.05×0.04                                                               | 0.14×0.05×0.04                                                               |
| $T/\text{K}$                | 293(2)                                                                       | 293(2)                                                                       | 293(2)                                                                       | 293(2)                                                                       |
| Crystal System              | monoclinic                                                                   | monoclinic                                                                   | monoclinic                                                                   | monoclinic                                                                   |
| Space Group                 | $P2_1/n$                                                                     | $P2_1/n$                                                                     | $P2_1/n$                                                                     | $P2_1/n$                                                                     |
| $a/\text{\AA}$              | 4.1080(2)                                                                    | 4.1001(7)                                                                    | 4.0748(3)                                                                    | 4.0582(5)                                                                    |
| $b/\text{\AA}$              | 17.6594(7)                                                                   | 17.631(3)                                                                    | 17.4994(16)                                                                  | 17.416(2)                                                                    |
| $c/\text{\AA}$              | 13.6139(9)                                                                   | 13.49(3)                                                                     | 13.284(17)                                                                   | 13.11(2)                                                                     |
| $\alpha/^\circ$             | 90                                                                           | 90                                                                           | 90                                                                           | 90                                                                           |
| $\beta/^\circ$              | 91.496(6)                                                                    | 91.79(4)                                                                     | 92.17(2)                                                                     | 92.75(3)                                                                     |
| $\gamma/^\circ$             | 90                                                                           | 90                                                                           | 90                                                                           | 90                                                                           |
| $V/\text{\AA}^3$            | 987.28(9)                                                                    | 975(2)                                                                       | 946.6(12)                                                                    | 925.5(14)                                                                    |
| $Z$                         | 4                                                                            | 4                                                                            | 4                                                                            | 4                                                                            |
| $Z'$                        | 1                                                                            | 1                                                                            | 1                                                                            | 1                                                                            |
| Wavelength/ $\text{\AA}$    | 0.71073                                                                      | 0.71073                                                                      | 0.71073                                                                      | 0.71073                                                                      |
| Radiation type              | Mo $K_\alpha$                                                                | Mo $K_\alpha$                                                                | Mo $K_\alpha$                                                                | Mo $K_\alpha$                                                                |
| $\theta_{min}/^\circ$       | 1.889                                                                        | 2.310                                                                        | 2.328                                                                        | 2.339                                                                        |
| $\theta_{max}/^\circ$       | 29.163                                                                       | 26.345                                                                       | 26.355                                                                       | 26.370                                                                       |
| Measured Refl.              | 4422                                                                         | 1856                                                                         | 2418                                                                         | 1950                                                                         |
| Indep't Refl's              | 1974                                                                         | 670                                                                          | 651                                                                          | 637                                                                          |
| Refl's $I \geq 2 \sigma(I)$ | 1629                                                                         | 478                                                                          | 530                                                                          | 525                                                                          |
| $R_{int}$                   | 0.0236                                                                       | 0.0560                                                                       | 0.0321                                                                       | 0.0301                                                                       |
| Parameters                  | 127                                                                          | 77                                                                           | 77                                                                           | 77                                                                           |
| Restraints                  | 0                                                                            | 0                                                                            | 0                                                                            | 0                                                                            |
| Largest Peak                | 0.658                                                                        | 0.565                                                                        | 0.350                                                                        | 0.429                                                                        |
| Deepest Hole                | -0.798                                                                       | -0.527                                                                       | -0.406                                                                       | -0.387                                                                       |
| GooF                        | 1.138                                                                        | 1.127                                                                        | 1.233                                                                        | 1.222                                                                        |
| $wR_2$ (all data)           | 0.0699                                                                       | 0.1688                                                                       | 0.0824                                                                       | 0.1070                                                                       |
| $wR_2$                      | 0.0656                                                                       | 0.1428                                                                       | 0.0751                                                                       | 0.1002                                                                       |
| $R_1$ (all data)            | 0.0529                                                                       | 0.0941                                                                       | 0.0471                                                                       | 0.0557                                                                       |
| $R_1$                       | 0.0386                                                                       | 0.0604                                                                       | 0.0347                                                                       | 0.0433                                                                       |

**Table S1-2.** Crystal data and structure refinements for (CuBr)<sub>2</sub>-Quin sample at different pressures (0.00-4.67GPa) at room temperature.

|                                                | <b>1.54 GPa</b>                                                              | <b>1.92 GPa</b>                                                              | <b>2.16GPa</b>                                                               | <b>2.54 GPa</b>                                                              |
|------------------------------------------------|------------------------------------------------------------------------------|------------------------------------------------------------------------------|------------------------------------------------------------------------------|------------------------------------------------------------------------------|
| CCDC                                           | 2226251                                                                      | 2226252                                                                      | 2226262                                                                      | 2226243                                                                      |
| Formula                                        | C <sub>8</sub> H <sub>6</sub> Br <sub>2</sub> Cu <sub>2</sub> N <sub>2</sub> | C <sub>8</sub> H <sub>6</sub> Br <sub>2</sub> Cu <sub>2</sub> N <sub>2</sub> | C <sub>8</sub> H <sub>6</sub> Br <sub>2</sub> Cu <sub>2</sub> N <sub>2</sub> | C <sub>8</sub> H <sub>6</sub> Br <sub>2</sub> Cu <sub>2</sub> N <sub>2</sub> |
| <i>D</i> <sub>calc.</sub> / g cm <sup>-3</sup> | 3.038                                                                        | 3.077                                                                        | 3.104                                                                        | 3.141                                                                        |
| $\mu$ /mm <sup>-1</sup>                        | 13.377                                                                       | 13.549                                                                       | 13.670                                                                       | 13.830                                                                       |
| Formula Weight                                 | 417.05                                                                       | 417.05                                                                       | 417.05                                                                       | 417.05                                                                       |
| Colour                                         | brown                                                                        | brown                                                                        | brown                                                                        | brown                                                                        |
| Shape                                          | plate-shaped                                                                 | plate-shaped                                                                 | plate-shaped                                                                 | plate-shaped                                                                 |
| Size/mm <sup>3</sup>                           | 0.14×0.05×0.04                                                               | 0.14×0.05×0.04                                                               | 0.14×0.05×0.04                                                               | 0.14×0.05×0.04                                                               |
| <i>T</i> /K                                    | 293(2)                                                                       | 293(2)                                                                       | 293(2)                                                                       | 293(2)                                                                       |
| Crystal System                                 | monoclinic                                                                   | monoclinic                                                                   | monoclinic                                                                   | monoclinic                                                                   |
| Space Group                                    | <i>P</i> 2 <sub>1</sub> / <i>n</i>                                           |
| <i>a</i> /Å                                    | 4.0491(5)                                                                    | 4.0427(4)                                                                    | 4.0458(4)                                                                    | 4.0217(6)                                                                    |
| <i>b</i> /Å                                    | 17.356(2)                                                                    | 17.2708(17)                                                                  | 17.2700(18)                                                                  | 17.112(3)                                                                    |
| <i>c</i> /Å                                    | 12.994(19)                                                                   | 12.915(15)                                                                   | 12.794(14)                                                                   | 12.84(2)                                                                     |
| $\alpha$ /°                                    | 90                                                                           | 90                                                                           | 90                                                                           | 90                                                                           |
| $\beta$ /°                                     | 93.14(3)                                                                     | 93.24(2)                                                                     | 93.40(2)                                                                     | 93.67(4)                                                                     |
| $\gamma$ /°                                    | 90                                                                           | 90                                                                           | 90                                                                           | 90                                                                           |
| <i>V</i> /Å <sup>3</sup>                       | 911.8(14)                                                                    | 900.3(10)                                                                    | 892.3(10)                                                                    | 882.0(15)                                                                    |
| <i>Z</i>                                       | 4                                                                            | 4                                                                            | 4                                                                            | 4                                                                            |
| <i>Z</i> '                                     | 1                                                                            | 1                                                                            | 1                                                                            | 1                                                                            |
| Wavelength/Å                                   | 0.71073                                                                      | 0.71073                                                                      | 0.71073                                                                      | 0.71073                                                                      |
| Radiation type                                 | Mo K $\alpha$                                                                | Mo K $\alpha$                                                                | Mo K $\alpha$                                                                | Mo K $\alpha$                                                                |
| $\theta$ <sub>min</sub> /°                     | 2.347                                                                        | 2.359                                                                        | 2.359                                                                        | 2.380                                                                        |
| $\theta$ <sub>max</sub> /°                     | 26.370                                                                       | 26.349                                                                       | 26.348                                                                       | 26.358                                                                       |
| Measured Refl.                                 | 1932                                                                         | 1816                                                                         | 2061                                                                         | 1595                                                                         |
| Indep't Refl's                                 | 628                                                                          | 623                                                                          | 618                                                                          | 629                                                                          |
| Refl's I≥2 $\sigma$ (I)                        | 496                                                                          | 510                                                                          | 490                                                                          | 446                                                                          |
| <i>R</i> <sub>int</sub>                        | 0.0373                                                                       | 0.0269                                                                       | 0.0382                                                                       | 0.0457                                                                       |
| Parameters                                     | 77                                                                           | 77                                                                           | 77                                                                           | 77                                                                           |
| Restraints                                     | 0                                                                            | 0                                                                            | 0                                                                            | 0                                                                            |
| Largest Peak                                   | 0.571                                                                        | 0.428                                                                        | 0.698                                                                        | 0.701                                                                        |
| Deepest Hole                                   | -0.585                                                                       | -0.461                                                                       | -0.729                                                                       | -0.707                                                                       |
| GooF                                           | 1.228                                                                        | 1.245                                                                        | 1.209                                                                        | 1.151                                                                        |
| <i>wR</i> <sub>2</sub> (all data)              | 0.1293                                                                       | 0.1173                                                                       | 0.1744                                                                       | 0.1592                                                                       |
| <i>wR</i> <sub>2</sub>                         | 0.1142                                                                       | 0.1094                                                                       | 0.1593                                                                       | 0.1293                                                                       |
| <i>R</i> <sub>1</sub> (all data)               | 0.0696                                                                       | 0.0536                                                                       | 0.0759                                                                       | 0.0941                                                                       |
| <i>R</i> <sub>1</sub>                          | 0.0489                                                                       | 0.0405                                                                       | 0.0587                                                                       | 0.0573                                                                       |

**Table S1-3.** Crystal data and structure refinements for (CuBr)<sub>2</sub>-Quin sample at different pressures (0.00-4.67GPa) at room temperature.

|                                                | <b>3.16 GPa</b>                                                              | <b>3.56 GPa</b>                                                              | <b>3.97GPa</b>                                                               | <b>4.62 GPa</b>                                                              |
|------------------------------------------------|------------------------------------------------------------------------------|------------------------------------------------------------------------------|------------------------------------------------------------------------------|------------------------------------------------------------------------------|
| CCDC                                           | 2226240                                                                      | 2226244                                                                      | 2226257                                                                      | 2226264                                                                      |
| Formula                                        | C <sub>8</sub> H <sub>6</sub> Br <sub>2</sub> Cu <sub>2</sub> N <sub>2</sub> | C <sub>8</sub> H <sub>6</sub> Cu <sub>2</sub> Br <sub>2</sub> N <sub>2</sub> | C <sub>8</sub> H <sub>6</sub> Cu <sub>2</sub> Br <sub>2</sub> N <sub>2</sub> | C <sub>8</sub> H <sub>6</sub> Br <sub>2</sub> Cu <sub>2</sub> N <sub>2</sub> |
| <i>D</i> <sub>calc.</sub> / g cm <sup>-3</sup> | 3.205                                                                        | 3.245                                                                        | 3.276                                                                        | 3.319                                                                        |
| $\mu$ /mm <sup>-1</sup>                        | 14.114                                                                       | 14.291                                                                       | 14.424                                                                       | 14.616                                                                       |
| Formula Weight                                 | 417.05                                                                       | 417.05                                                                       | 417.05                                                                       | 417.05                                                                       |
| Colour                                         | brown                                                                        | brown                                                                        | brown                                                                        | brown                                                                        |
| Shape                                          | plate-shaped                                                                 | plate-shaped                                                                 | plate-shaped                                                                 | plate-shaped                                                                 |
| Size/mm <sup>3</sup>                           | 0.14×0.05×0.04                                                               | 0.14×0.05×0.04                                                               | 0.11×0.05×0.04                                                               | 0.14×0.05×0.04                                                               |
| <i>T</i> /K                                    | 293(2)                                                                       | 298(2)                                                                       | 298(2)                                                                       | 298(2)                                                                       |
| Crystal System                                 | monoclinic                                                                   | triclinic                                                                    | triclinic                                                                    | triclinic                                                                    |
| Space Group                                    | <i>P</i> 2 <sub>1</sub> / <i>n</i>                                           | <i>P</i> -1                                                                  | <i>P</i> -1                                                                  | <i>P</i> -1                                                                  |
| <i>a</i> /Å                                    | 4.0403(3)                                                                    | 4.0457(9)                                                                    | 4.0608(10)                                                                   | 4.0605(12)                                                                   |
| <i>b</i> /Å                                    | 17.0981(12)                                                                  | 17.0296(16)                                                                  | 16.9204(19)                                                                  | 16.839(3)                                                                    |
| <i>c</i> /Å                                    | 12.544(9)                                                                    | 12.438(5)                                                                    | 12.376(5)                                                                    | 12.287(7)                                                                    |
| $\alpha$ /°                                    | 90                                                                           | 88.73(2)                                                                     | 88.34(2)                                                                     | 88.48(3)                                                                     |
| $\beta$ /°                                     | 94.18(2)                                                                     | 94.39(4)                                                                     | 94.54(4)                                                                     | 94.88(5)                                                                     |
| $\gamma$ /°                                    | 90                                                                           | 87.861(13)                                                                   | 86.499(15)                                                                   | 86.038(18)                                                                   |
| <i>V</i> /Å <sup>3</sup>                       | 864.2(6)                                                                     | 853.6(4)                                                                     | 845.7(4)                                                                     | 834.6(6)                                                                     |
| <i>Z</i>                                       | 4                                                                            | 4                                                                            | 4                                                                            | 4                                                                            |
| <i>Z</i> '                                     | 1                                                                            | 2                                                                            | 2                                                                            | 2                                                                            |
| Wavelength/Å                                   | 0.71073                                                                      | 0.71073                                                                      | 0.71073                                                                      | 0.71073                                                                      |
| Radiation type                                 | Mo K $\alpha$                                                                | Mo K $\alpha$                                                                | Mo K $\alpha$                                                                | Mo K $\alpha$                                                                |
| $\theta_{min}$ /°                              | 2.382                                                                        | 2.394                                                                        | 2.413                                                                        | 2.426                                                                        |
| $\theta_{max}$ /°                              | 26.352                                                                       | 23.251                                                                       | 23.256                                                                       | 23.231                                                                       |
| Measured Refl.                                 | 1536                                                                         | 2820                                                                         | 2174                                                                         | 2350                                                                         |
| Indep't Refl's                                 | 507                                                                          | 841                                                                          | 871                                                                          | 883                                                                          |
| Refl's $I \geq 2 \sigma(I)$                    | 412                                                                          | 582                                                                          | 586                                                                          | 558                                                                          |
| <i>R</i> <sub>int</sub>                        | 0.0288                                                                       | 0.0664                                                                       | 0.0608                                                                       | 0.0933                                                                       |
| Parameters                                     | 77                                                                           | 87                                                                           | 87                                                                           | 87                                                                           |
| Restraints                                     | 0                                                                            | 14                                                                           | 14                                                                           | 14                                                                           |
| Largest Peak                                   | 0.502                                                                        | 1.426                                                                        | 1.177                                                                        | 1.712                                                                        |
| Deepest Hole                                   | -0.410                                                                       | -1.130                                                                       | -1.156                                                                       | -1.121                                                                       |
| GooF                                           | 1.193                                                                        | 1.119                                                                        | 1.170                                                                        | 1.156                                                                        |
| <i>wR</i> <sub>2</sub> (all data)              | 0.1059                                                                       | 0.3595                                                                       | 0.3637                                                                       | 0.4130                                                                       |
| <i>wR</i> <sub>2</sub>                         | 0.0971                                                                       | 0.3205                                                                       | 0.3176                                                                       | 0.3665                                                                       |
| <i>R</i> <sub>1</sub> (all data)               | 0.0563                                                                       | 0.1887                                                                       | 0.1889                                                                       | 0.2170                                                                       |
| <i>R</i> <sub>1</sub>                          | 0.0422                                                                       | 0.1375                                                                       | 0.1372                                                                       | 0.1575                                                                       |

**Table S2-1.** Crystal data and structure refinements for (CuI)<sub>2</sub>-Quin sample at different pressures (0.00-7.00GPa) at room temperature.

|                                                | <b>0.00 GPa</b>                                                             | <b>0.47 GPa</b>                                                             | <b>0.90GPa</b>                                                              | <b>1.36 GPa</b>                                                             |
|------------------------------------------------|-----------------------------------------------------------------------------|-----------------------------------------------------------------------------|-----------------------------------------------------------------------------|-----------------------------------------------------------------------------|
| CCDC                                           | 2226248                                                                     | 2226249                                                                     | 2226241                                                                     | 2226254                                                                     |
| Formula                                        | C <sub>8</sub> H <sub>6</sub> Cu <sub>2</sub> I <sub>2</sub> N <sub>2</sub> | C <sub>8</sub> H <sub>6</sub> Cu <sub>2</sub> I <sub>2</sub> N <sub>2</sub> | C <sub>8</sub> H <sub>6</sub> Cu <sub>2</sub> I <sub>2</sub> N <sub>2</sub> | C <sub>8</sub> H <sub>6</sub> Cu <sub>2</sub> I <sub>2</sub> N <sub>2</sub> |
| <i>D</i> <sub>calc.</sub> / g cm <sup>-3</sup> | 3.165                                                                       | 3.267                                                                       | 3.348                                                                       | 3.423                                                                       |
| $\mu$ /mm <sup>-1</sup>                        | 9.680                                                                       | 9.992                                                                       | 10.241                                                                      | 10.470                                                                      |
| Formula Weight                                 | 511.03                                                                      | 511.03                                                                      | 511.03                                                                      | 511.03                                                                      |
| Colour                                         | yellow                                                                      | brown                                                                       | brown                                                                       | brown                                                                       |
| Shape                                          | plate-shaped                                                                | plate-shaped                                                                | plate-shaped                                                                | plate-shaped                                                                |
| Size/mm <sup>3</sup>                           | 0.07×0.03×0.01                                                              | 0.07×0.03×0.01                                                              | 0.07×0.03×0.01                                                              | 0.07×0.03×0.01                                                              |
| <i>T</i> /K                                    | 298(1)                                                                      | 298(2)                                                                      | 298(2)                                                                      | 298(2)                                                                      |
| Crystal System                                 | monoclinic                                                                  | monoclinic                                                                  | monoclinic                                                                  | monoclinic                                                                  |
| Space Group                                    | <i>P</i> 2 <sub>1</sub> / <i>n</i>                                          |
| <i>a</i> /Å                                    | 4.3719(2)                                                                   | 4.35209(15)                                                                 | 4.34081(14)                                                                 | 4.33064(15)                                                                 |
| <i>b</i> /Å                                    | 17.7203(8)                                                                  | 17.5879(7)                                                                  | 17.4953(6)                                                                  | 17.3971(7)                                                                  |
| <i>c</i> /Å                                    | 13.8614(6)                                                                  | 13.599(6)                                                                   | 13.380(5)                                                                   | 13.198(6)                                                                   |
| $\alpha$ /°                                    | 90                                                                          | 90                                                                          | 90                                                                          | 90                                                                          |
| $\beta$ /°                                     | 92.886(4)                                                                   | 93.523(8)                                                                   | 93.899(8)                                                                   | 94.268(9)                                                                   |
| $\gamma$ /°                                    | 90                                                                          | 90                                                                          | 90                                                                          | 90                                                                          |
| <i>V</i> /Å <sup>3</sup>                       | 1072.50(8)                                                                  | 1039.0(5)                                                                   | 1013.8(4)                                                                   | 991.6(4)                                                                    |
| <i>Z</i>                                       | 4                                                                           | 4                                                                           | 4                                                                           | 4                                                                           |
| <i>Z</i> '                                     | 1                                                                           | 1                                                                           | 1                                                                           | 1                                                                           |
| Wavelength/Å                                   | 0.71073                                                                     | 0.3185                                                                      | 0.3185                                                                      | 0.3185                                                                      |
| Radiation type                                 | MoK $\alpha$                                                                | synchrotron                                                                 | synchrotron                                                                 | synchrotron                                                                 |
| $\theta$ <sub>min</sub> /°                     | 1.867                                                                       | 2.076                                                                       | 2.087                                                                       | 2.098                                                                       |
| $\theta$ <sub>max</sub> /°                     | 26.370                                                                      | 11.478                                                                      | 11.478                                                                      | 11.478                                                                      |
| Measured Refl.                                 | 4012                                                                        | 1657                                                                        | 1647                                                                        | 1605                                                                        |
| Indep't Refl's                                 | 2198                                                                        | 857                                                                         | 841                                                                         | 826                                                                         |
| Refl's I≥2 $\sigma$ (I)                        | 1838                                                                        | 714                                                                         | 714                                                                         | 695                                                                         |
| <i>R</i> <sub>int</sub>                        | 0.0289                                                                      | 0.0455                                                                      | 0.0386                                                                      | 0.0384                                                                      |
| Parameters                                     | 127                                                                         | 77                                                                          | 77                                                                          | 77                                                                          |
| Restraints                                     | 0                                                                           | 0                                                                           | 0                                                                           | 0                                                                           |
| Largest Peak                                   | 0.742                                                                       | 1.145                                                                       | 1.100                                                                       | 0.818                                                                       |
| Deepest Hole                                   | -0.798                                                                      | -1.147                                                                      | -1.473                                                                      | -0.739                                                                      |
| GooF                                           | 1.055                                                                       | 1.045                                                                       | 1.034                                                                       | 1.087                                                                       |
| <i>wR</i> <sub>2</sub> (all data)              | 0.0681                                                                      | 0.1752                                                                      | 0.1591                                                                      | 0.1386                                                                      |
| <i>wR</i> <sub>2</sub>                         | 0.0638                                                                      | 0.1650                                                                      | 0.1520                                                                      | 0.1295                                                                      |
| <i>R</i> <sub>1</sub> (all data)               | 0.0516                                                                      | 0.0743                                                                      | 0.0667                                                                      | 0.0584                                                                      |
| <i>R</i> <sub>1</sub>                          | 0.0376                                                                      | 0.0649                                                                      | 0.0593                                                                      | 0.0497                                                                      |

**Table S2-2.** Crystal data and structure refinements for (CuI)<sub>2</sub>-Quin sample at different pressures (0.00-7.00GPa) at room temperature.

|                              | <b>1.80 GPa</b>                                                             | <b>2.20 GPa</b>                                                             | <b>2.64GPa</b>                                                              | <b>3.25 GPa</b>                                                             |
|------------------------------|-----------------------------------------------------------------------------|-----------------------------------------------------------------------------|-----------------------------------------------------------------------------|-----------------------------------------------------------------------------|
| CCDC                         | 2226263                                                                     | 2226245                                                                     | 2226247                                                                     | 2226256                                                                     |
| Formula                      | C <sub>8</sub> H <sub>6</sub> Cu <sub>2</sub> I <sub>2</sub> N <sub>2</sub> | C <sub>8</sub> H <sub>6</sub> Cu <sub>2</sub> I <sub>2</sub> N <sub>2</sub> | C <sub>8</sub> H <sub>6</sub> Cu <sub>2</sub> I <sub>2</sub> N <sub>2</sub> | C <sub>8</sub> H <sub>6</sub> Cu <sub>2</sub> I <sub>2</sub> N <sub>2</sub> |
| $D_{calc.}/\text{g cm}^{-3}$ | 3.490                                                                       | 3.540                                                                       | 3.595                                                                       | 3.667                                                                       |
| $\mu/\text{mm}^{-1}$         | 10.673                                                                      | 10.826                                                                      | 10.995                                                                      | 11.215                                                                      |
| Formula Weight               | 511.03                                                                      | 511.03                                                                      | 511.03                                                                      | 511.03                                                                      |
| Colour                       | brown                                                                       | brown                                                                       | brown                                                                       | brown                                                                       |
| Shape                        | plate-shaped                                                                | plate-shaped                                                                | plate-shaped                                                                | plate-shaped                                                                |
| Size/mm <sup>3</sup>         | 0.07×0.03×0.01                                                              | 0.07×0.03×0.01                                                              | 0.07×0.03×0.01                                                              | 0.07×0.03×0.01                                                              |
| $T/\text{K}$                 | 298(2)                                                                      | 298(2)                                                                      | 298(2)                                                                      | 298(2)                                                                      |
| Crystal System               | monoclinic                                                                  | monoclinic                                                                  | monoclinic                                                                  | triclinic                                                                   |
| Space Group                  | $P2_1/n$                                                                    | $P2_1/n$                                                                    | $P2_1/n$                                                                    | $P-1$                                                                       |
| $a/\text{\AA}$               | 4.32447(14)                                                                 | 4.31914(15)                                                                 | 4.31385(15)                                                                 | 4.3090(2)                                                                   |
| $b/\text{\AA}$               | 17.3162(6)                                                                  | 17.2490(7)                                                                  | 17.1743(6)                                                                  | 17.0807(9)                                                                  |
| $c/\text{\AA}$               | 13.030(5)                                                                   | 12.916(5)                                                                   | 12.794(5)                                                                   | 12.645(2)                                                                   |
| $\alpha/^\circ$              | 90                                                                          | 90                                                                          | 90                                                                          | 88.916(11)                                                                  |
| $\beta/^\circ$               | 94.505(8)                                                                   | 94.749(9)                                                                   | 94.988(9)                                                                   | 95.228(11)                                                                  |
| $\gamma/^\circ$              | 90                                                                          | 90                                                                          | 90                                                                          | 92.637(4)                                                                   |
| $V/\text{\AA}^3$             | 972.7(4)                                                                    | 959.0(4)                                                                    | 944.2(4)                                                                    | 925.71(17)                                                                  |
| $Z$                          | 4                                                                           | 4                                                                           | 4                                                                           | 4                                                                           |
| $Z'$                         | 1                                                                           | 1                                                                           | 1                                                                           | 2                                                                           |
| Wavelength/ $\text{\AA}$     | 0.3185                                                                      | 0.3185                                                                      | 0.3185                                                                      | 0.3185                                                                      |
| Radiation type               | synchrotron                                                                 | synchrotron                                                                 | synchrotron                                                                 | synchrotron                                                                 |
| $\theta_{min}/^\circ$        | 2.108                                                                       | 2.116                                                                       | 2.126                                                                       | 2.129                                                                       |
| $\theta_{max}/^\circ$        | 11.481                                                                      | 11.479                                                                      | 11.476                                                                      | 11.779                                                                      |
| Measured Refl.               | 1585                                                                        | 1619                                                                        | 1490                                                                        | 1584                                                                        |
| Indep't Refl's               | 811                                                                         | 811                                                                         | 786                                                                         | 1242                                                                        |
| Refl's $I \geq 2\sigma(I)$   | 686                                                                         | 669                                                                         | 648                                                                         | 796                                                                         |
| $R_{int}$                    | 0.0363                                                                      | 0.0348                                                                      | 0.0520                                                                      | 0.0476                                                                      |
| Parameters                   | 72                                                                          | 77                                                                          | 77                                                                          | 99                                                                          |
| Restraints                   | 0                                                                           | 0                                                                           | 0                                                                           | 12                                                                          |
| Largest Peak                 | 2.490                                                                       | 1.379                                                                       | 1.088                                                                       | 1.512                                                                       |
| Deepest Hole                 | -2.566                                                                      | -1.200                                                                      | -0.892                                                                      | -1.487                                                                      |
| GooF                         | 1.043                                                                       | 1.078                                                                       | 1.020                                                                       | 1.057                                                                       |
| $wR_2$ (all data)            | 0.1985                                                                      | 0.1764                                                                      | 0.1432                                                                      | 0.3065                                                                      |
| $wR_2$                       | 0.1857                                                                      | 0.1654                                                                      | 0.1358                                                                      | 0.2681                                                                      |
| $R_1$ (all data)             | 0.0789                                                                      | 0.0679                                                                      | 0.0641                                                                      | 0.1360                                                                      |
| $R_1$                        | 0.0703                                                                      | 0.0584                                                                      | 0.0558                                                                      | 0.0976                                                                      |

**Table S2-3.** Crystal data and structure refinements for (CuI)<sub>2</sub>-Quin sample at different pressures (0.00-7.00GPa) at room temperature.

|                              | <b>3.69 GPa</b>                                                             | <b>4.20 GPa</b>                                                             | <b>4.81GPa</b>                                                              | <b>5.43 GPa</b>                                                             |
|------------------------------|-----------------------------------------------------------------------------|-----------------------------------------------------------------------------|-----------------------------------------------------------------------------|-----------------------------------------------------------------------------|
| CCDC                         | 2226253                                                                     | 2226250                                                                     | 2226246                                                                     | 2226260                                                                     |
| Formula                      | C <sub>8</sub> H <sub>6</sub> Cu <sub>2</sub> I <sub>2</sub> N <sub>2</sub> | C <sub>8</sub> H <sub>6</sub> Cu <sub>2</sub> I <sub>2</sub> N <sub>2</sub> | C <sub>8</sub> H <sub>6</sub> Cu <sub>2</sub> I <sub>2</sub> N <sub>2</sub> | C <sub>8</sub> H <sub>6</sub> Cu <sub>2</sub> I <sub>2</sub> N <sub>2</sub> |
| $D_{calc.}/\text{g cm}^{-3}$ | 3.712                                                                       | 3.768                                                                       | 3.821                                                                       | 3.878                                                                       |
| $\mu/\text{mm}^{-1}$         | 11.354                                                                      | 11.524                                                                      | 11.687                                                                      | 11.863                                                                      |
| Formula Weight               | 511.03                                                                      | 511.03                                                                      | 511.03                                                                      | 511.03                                                                      |
| Colour                       | brown                                                                       | brown                                                                       | brown                                                                       | brown                                                                       |
| Shape                        | plate-shaped                                                                | plate-shaped                                                                | plate-shaped                                                                | plate-shaped                                                                |
| Size/mm <sup>3</sup>         | 0.07×0.03×0.01                                                              | 0.07×0.03×0.01                                                              | 0.07×0.03×0.01                                                              | 0.07×0.03×0.01                                                              |
| $T/\text{K}$                 | 298(2)                                                                      | 298(2)                                                                      | 298(2)                                                                      | 298(2)                                                                      |
| Crystal System               | triclinic                                                                   | triclinic                                                                   | triclinic                                                                   | triclinic                                                                   |
| Space Group                  | <i>P</i> -1                                                                 | <i>P</i> -1                                                                 | <i>P</i> -1                                                                 | <i>P</i> -1                                                                 |
| $a/\text{\AA}$               | 4.3058(2)                                                                   | 4.2967(2)                                                                   | 4.2856(2)                                                                   | 4.2732(2)                                                                   |
| $b/\text{\AA}$               | 17.0097(8)                                                                  | 16.9316(9)                                                                  | 16.8529(8)                                                                  | 16.7757(8)                                                                  |
| $c/\text{\AA}$               | 12.575(2)                                                                   | 12.4932(16)                                                                 | 12.4245(18)                                                                 | 12.3479(15)                                                                 |
| $\alpha/^\circ$              | 87.899(9)                                                                   | 87.230(10)                                                                  | 86.825(9)                                                                   | 86.492(9)                                                                   |
| $\beta/^\circ$               | 95.572(9)                                                                   | 95.864(10)                                                                  | 96.157(10)                                                                  | 96.410(9)                                                                   |
| $\gamma/^\circ$              | 93.641(4)                                                                   | 94.214(5)                                                                   | 94.615(4)                                                                   | 94.934(4)                                                                   |
| $V/\text{\AA}^3$             | 914.40(16)                                                                  | 900.93(14)                                                                  | 888.30(14)                                                                  | 875.19(12)                                                                  |
| $Z$                          | 4                                                                           | 4                                                                           | 4                                                                           | 4                                                                           |
| $Z'$                         | 2                                                                           | 2                                                                           | 2                                                                           | 2                                                                           |
| Wavelength/ $\text{\AA}$     | 0.3185                                                                      | 0.3185                                                                      | 0.3185                                                                      | 0.3185                                                                      |
| Radiation type               | synchrotron                                                                 | synchrotron                                                                 | synchrotron                                                                 | synchrotron                                                                 |
| $\theta_{min}/^\circ$        | 2.134                                                                       | 2.140                                                                       | 2.148                                                                       | 2.156                                                                       |
| $\theta_{max}/^\circ$        | 11.778                                                                      | 11.781                                                                      | 11.777                                                                      | 11.778                                                                      |
| Measured Refl.               | 1581                                                                        | 1583                                                                        | 1463                                                                        | 1524                                                                        |
| Indep't Refl's               | 1232                                                                        | 1222                                                                        | 1165                                                                        | 1188                                                                        |
| Refl's $I \geq 2\sigma(I)$   | 812                                                                         | 798                                                                         | 780                                                                         | 779                                                                         |
| $R_{int}$                    | 0.0354                                                                      | 0.0273                                                                      | 0.0193                                                                      | 0.0228                                                                      |
| Parameters                   | 75                                                                          | 75                                                                          | 75                                                                          | 75                                                                          |
| Restraints                   | 0                                                                           | 0                                                                           | 0                                                                           | 0                                                                           |
| Largest Peak                 | 1.987                                                                       | 2.408                                                                       | 1.611                                                                       | 2.052                                                                       |
| Deepest Hole                 | -1.606                                                                      | -1.863                                                                      | -1.574                                                                      | -1.589                                                                      |
| GooF                         | 1.047                                                                       | 1.022                                                                       | 1.070                                                                       | 1.088                                                                       |
| $wR_2$ (all data)            | 0.2599                                                                      | 0.2657                                                                      | 0.2302                                                                      | 0.2245                                                                      |
| $wR_2$                       | 0.2219                                                                      | 0.2335                                                                      | 0.2040                                                                      | 0.2019                                                                      |
| $R_1$ (all data)             | 0.1148                                                                      | 0.1155                                                                      | 0.0982                                                                      | 0.0982                                                                      |
| $R_1$                        | 0.0815                                                                      | 0.0871                                                                      | 0.0728                                                                      | 0.0706                                                                      |

**Table S2-4.** Crystal data and structure refinements for (CuI)<sub>2</sub>-Quin sample at different pressures (0.00-7.00GPa) at room temperature.

|                              | <b>6.21 GPa</b>                                                             | <b>7.00 GPa</b>                                                             |
|------------------------------|-----------------------------------------------------------------------------|-----------------------------------------------------------------------------|
| CCDC                         | 2226255                                                                     | 2226242                                                                     |
| Formula                      | C <sub>8</sub> H <sub>6</sub> Cu <sub>2</sub> I <sub>2</sub> N <sub>2</sub> | C <sub>8</sub> H <sub>6</sub> Cu <sub>2</sub> I <sub>2</sub> N <sub>2</sub> |
| $D_{calc.}/\text{g cm}^{-3}$ | 3.943                                                                       | 3.998                                                                       |
| $\mu/\text{mm}^{-1}$         | 12.060                                                                      | 12.229                                                                      |
| Formula Weight               | 511.03                                                                      | 511.03                                                                      |
| Colour                       | brown                                                                       | brown                                                                       |
| Shape                        | plate-shaped                                                                | plate-shaped                                                                |
| Size/mm <sup>3</sup>         | 0.07×0.03×0.01                                                              | 0.07×0.03×0.01                                                              |
| $T/\text{K}$                 | 298(2)                                                                      | 298(2)                                                                      |
| Crystal System               | triclinic                                                                   | triclinic                                                                   |
| Space Group                  | <i>P</i> -1                                                                 | <i>P</i> -1                                                                 |
| $a/\text{\AA}$               | 4.2579(2)                                                                   | 4.2434(3)                                                                   |
| $b/\text{\AA}$               | 16.6820(8)                                                                  | 16.6059(13)                                                                 |
| $c/\text{\AA}$               | 12.2725(15)                                                                 | 12.2104(19)                                                                 |
| $\alpha/^\circ$              | 86.288(9)                                                                   | 86.177(15)                                                                  |
| $\beta/^\circ$               | 96.694(9)                                                                   | 96.911(15)                                                                  |
| $\gamma/^\circ$              | 95.230(4)                                                                   | 95.458(7)                                                                   |
| $V/\text{\AA}^3$             | 860.88(12)                                                                  | 848.96(17)                                                                  |
| $Z$                          | 4                                                                           | 4                                                                           |
| $Z'$                         | 2                                                                           | 2                                                                           |
| Wavelength/ $\text{\AA}$     | 0.3185                                                                      | 0.3185                                                                      |
| Radiation type               | synchrotron                                                                 | synchrotron                                                                 |
| $\theta_{min}/^\circ$        | 2.166                                                                       | 2.175                                                                       |
| $\theta_{max}/^\circ$        | 11.780                                                                      | 11.774                                                                      |
| Measured Refl.               | 1504                                                                        | 1409                                                                        |
| Indep't Refl's               | 1173                                                                        | 1123                                                                        |
| Refl's $I \geq 2\sigma(I)$   | 794                                                                         | 671                                                                         |
| $R_{int}$                    | 0.0173                                                                      | 0.0229                                                                      |
| Parameters                   | 75                                                                          | 75                                                                          |
| Restraints                   | 0                                                                           | 0                                                                           |
| Largest Peak                 | 1.728                                                                       | 1.702                                                                       |
| Deepest Hole                 | -1.559                                                                      | -1.788                                                                      |
| GooF                         | 1.087                                                                       | 1.061                                                                       |
| $wR_2$ (all data)            | 0.2177                                                                      | 0.2242                                                                      |
| $wR_2$                       | 0.1939                                                                      | 0.2002                                                                      |
| $R_1$ (all data)             | 0.0897                                                                      | 0.1038                                                                      |
| $R_1$                        | 0.0657                                                                      | 0.0667                                                                      |

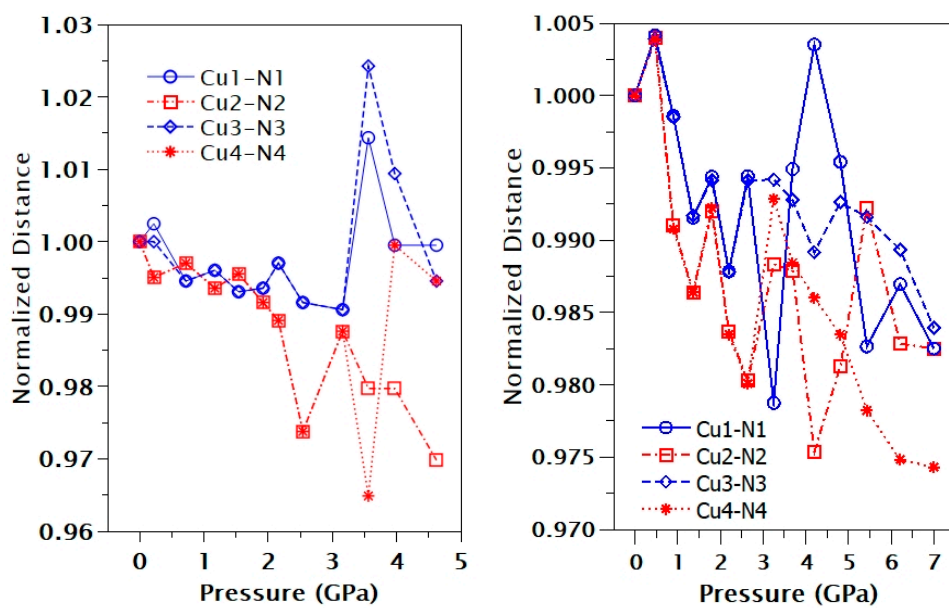

**Figure S3.** Normalized distances for Cu-N for for  $(\text{CuX})_2\text{-Quin}$  ( $\text{X}=\text{Br}, \text{I}$ ) compounds

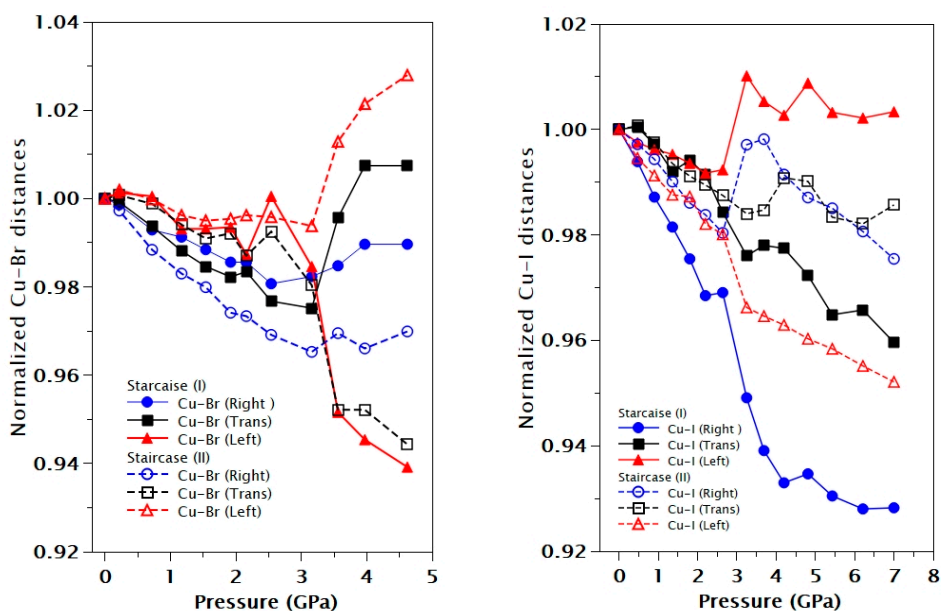

**Figure S4.** Normalized distances for Cu-X for for  $(\text{CuX})_2\text{-Quin}$  ( $\text{X}=\text{Br}, \text{I}$ ) compounds

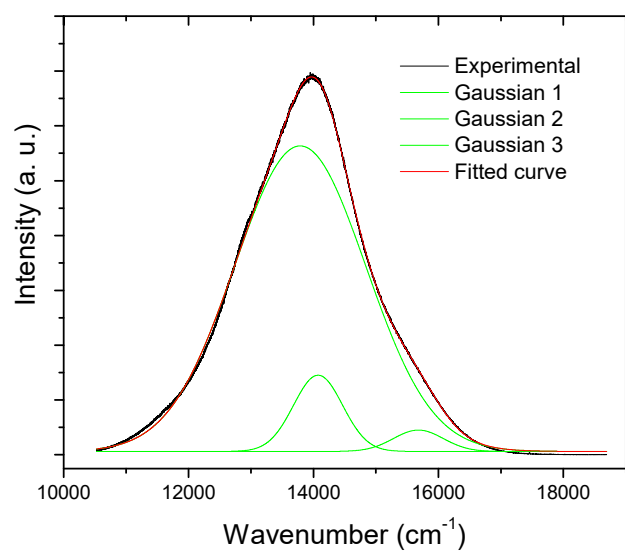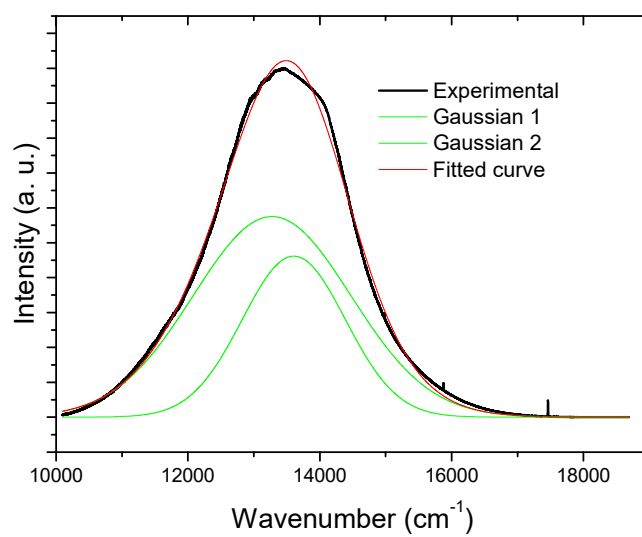

**Figure S5.** Room temperature emission spectrum fitted to three Gaussians for (CuBr)<sub>2</sub>-Quin (top) and (CuIr)<sub>2</sub>-Quin (bottom) compounds
