# Supplementary material for: Structural and Luminescence Properties of Cu(I)X-Quinoxaline under High Pressure (X = Br, I)
Source: MDPI journal article supplement (doi:10.3390/cryst13010100), 2023-01-05
Supplement: s1 [file s1]

## General Comments to CheckCIF Alerts

All alerts (A,B and C) can be explained due to High Pressure setup because the crystal is inside of a Diamond anvil cell (DAC). The opening angle of the DAC limit the number of total reflections measured in the experiment. The quality of data decrease when pressure increase and the ratio about number of reflections and number of parameters to refine is lower than in normal conditions.

## checkCIF/PLATON report

Structure factors have been supplied for datablock(s) CuBr-Quin\_000GPa

THIS REPORT IS FOR GUIDANCE ONLY. IF USED AS PART OF A REVIEW PROCEDURE FOR PUBLICATION, IT SHOULD NOT REPLACE THE EXPERTISE OF AN EXPERIENCED CRYSTALLOGRAPHIC REFEREE.

No syntax errors found.      CIF dictionary      Interpreting this report

### Datablock: CuBr-Quin\_000GPa

---

|                        |                  |                                  |
|------------------------|------------------|----------------------------------|
| Bond precision:        | C-C = 0.0077 A   | Wavelength=0.71073               |
| Cell:                  | a=4.1080 (2)     | b=17.6594 (7)      c=13.6139 (9) |
|                        | alpha=90         | beta=91.496 (6)      gamma=90    |
| Temperature:           | 293 K            |                                  |
|                        | Calculated       | Reported                         |
| Volume                 | 987.28 (9)       | 987.28 (9)                       |
| Space group            | P 21/n           | P 1 21/n 1                       |
| Hall group             | -P 2yn           | -P 2yn                           |
| Moiety formula         | C8 H6 Br2 Cu2 N2 | C8 H6 Br2 Cu2 N2                 |
| Sum formula            | C8 H6 Br2 Cu2 N2 | C8 H6 Br2 Cu2 N2                 |
| Mr                     | 417.05           | 417.05                           |
| Dx, g cm <sup>-3</sup> | 2.806            | 2.806                            |
| Z                      | 4                | 4                                |
| Mu (mm <sup>-1</sup> ) | 12.355           | 12.355                           |
| F000                   | 784.0            | 784.0                            |
| F000'                  | 784.73           |                                  |
| h, k, lmax             | 5, 24, 18        | 5, 23, 17                        |
| Nref                   | 2671             | 1974                             |
| Tmin, Tmax             | 0.481, 0.690     | 0.290, 0.734                     |
| Tmin'                  | 0.176            |                                  |

Correction method= # Reported T Limits: Tmin=0.290 Tmax=0.734  
AbsCorr = GAUSSIAN

Data completeness= 0.739      Theta(max)= 29.163

|                                |                                  |
|--------------------------------|----------------------------------|
| R(reflections)= 0.0386 ( 1629) | wR2(reflections)= 0.0699 ( 1974) |
| S = 1.138                      | Npar= 127                        |

---

The following ALERTS were generated. Each ALERT has the format

**test-name\_ALERT\_alert-type\_alert-level.**

Click on the hyperlinks for more details of the test.

---

 **Alert level A**

PLAT029\_ALERT\_3\_A \_diffrn\_measured\_fraction\_theta\_full value Low . 0.808 Why?

---

 **Alert level B**

PLAT911\_ALERT\_3\_B Missing FCF Refl Between Thmin & STh/L= 0.600 341 Report

---

 **Alert level C**

PLAT241\_ALERT\_2\_C High 'MainMol' Ueq as Compared to Neighbors of Cu1 Check  
PLAT341\_ALERT\_3\_C Low Bond Precision on C-C Bonds ..... 0.00771 Ang.  
PLAT906\_ALERT\_3\_C Large K Value in the Analysis of Variance ..... 5.323 Check

---

 **Alert level G**

PLAT004\_ALERT\_5\_G Polymeric Structure Found with Maximum Dimension 2 Info  
PLAT199\_ALERT\_1\_G Reported \_cell\_measurement\_temperature ..... (K) 293 Check  
PLAT200\_ALERT\_1\_G Reported \_diffrn\_ambient\_temperature ..... (K) 293 Check  
PLAT232\_ALERT\_2\_G Hirshfeld Test Diff (M-X) Br1 --Cu1 . 18.7 s.u.  
PLAT232\_ALERT\_2\_G Hirshfeld Test Diff (M-X) Br1 --Cu1\_a . 40.3 s.u.  
PLAT232\_ALERT\_2\_G Hirshfeld Test Diff (M-X) Br1 --Cu2\_c . 40.4 s.u.  
PLAT232\_ALERT\_2\_G Hirshfeld Test Diff (M-X) Br2 --Cu2 . 26.0 s.u.  
PLAT232\_ALERT\_2\_G Hirshfeld Test Diff (M-X) Br2 --Cu2\_b . 39.8 s.u.  
PLAT232\_ALERT\_2\_G Hirshfeld Test Diff (M-X) Br2 --Cu1\_f . 47.2 s.u.  
PLAT912\_ALERT\_4\_G Missing # of FCF Reflections Above STh/L= 0.600 337 Note  
PLAT941\_ALERT\_3\_G Average HKL Measurement Multiplicity ..... 2.2 Low  
PLAT978\_ALERT\_2\_G Number C-C Bonds with Positive Residual Density. 1 Info

---

- 1 **ALERT level A** = Most likely a serious problem - resolve or explain  
1 **ALERT level B** = A potentially serious problem, consider carefully  
3 **ALERT level C** = Check. Ensure it is not caused by an omission or oversight  
12 **ALERT level G** = General information/check it is not something unexpected

- 2 ALERT type 1 CIF construction/syntax error, inconsistent or missing data  
8 ALERT type 2 Indicator that the structure model may be wrong or deficient  
5 ALERT type 3 Indicator that the structure quality may be low  
1 ALERT type 4 Improvement, methodology, query or suggestion  
1 ALERT type 5 Informative message, check
-

It is advisable to attempt to resolve as many as possible of the alerts in all categories. Often the minor alerts point to easily fixed oversights, errors and omissions in your CIF or refinement strategy, so attention to these fine details can be worthwhile. In order to resolve some of the more serious problems it may be necessary to carry out additional measurements or structure refinements. However, the purpose of your study may justify the reported deviations and the more serious of these should normally be commented upon in the discussion or experimental section of a paper or in the "special\_details" fields of the CIF. checkCIF was carefully designed to identify outliers and unusual parameters, but every test has its limitations and alerts that are not important in a particular case may appear. Conversely, the absence of alerts does not guarantee there are no aspects of the results needing attention. It is up to the individual to critically assess their own results and, if necessary, seek expert advice.

### **Publication of your CIF in IUCr journals**

A basic structural check has been run on your CIF. These basic checks will be run on all CIFs submitted for publication in IUCr journals (*Acta Crystallographica*, *Journal of Applied Crystallography*, *Journal of Synchrotron Radiation*); however, if you intend to submit to *Acta Crystallographica Section C* or *E* or *IUCrData*, you should make sure that **full publication checks** are run on the final version of your CIF prior to submission.

### **Publication of your CIF in other journals**

Please refer to the *Notes for Authors* of the relevant journal for any special instructions relating to CIF submission.



```
R(reflections)= 0.0604( 478)      wR2(reflections)=
                                0.1688( 670)
S = 1.127                        Npar= 77
```

---

The following ALERTS were generated. Each ALERT has the format

**test-name\_ALERT\_alert-type\_alert-level.**

Click on the hyperlinks for more details of the test.

---

#### **Alert level A**

PLAT029\_ALERT\_3\_A \_diffn\_measured\_fraction\_theta\_full value Low . 0.346 Why?

---

#### **Alert level B**

PLAT201\_ALERT\_2\_B Isotropic non-H Atoms in Main Residue(s) ..... 10 Report  
                  N1          N2          C1          C2          C3          etc.  
PLAT341\_ALERT\_3\_B Low Bond Precision on C-C Bonds ..... 0.04429 Ang.

---

#### **Alert level C**

PLAT088\_ALERT\_3\_C Poor Data / Parameter Ratio ..... 8.70 Note  
PLAT148\_ALERT\_3\_C s.u. on the c - Axis is (Too) Large .... 0.030 Ang.  
PLAT241\_ALERT\_2\_C High 'MainMol' Ueq as Compared to Neighbors of Cu1 Check  
PLAT241\_ALERT\_2\_C High 'MainMol' Ueq as Compared to Neighbors of Cu2 Check  
PLAT906\_ALERT\_3\_C Large K Value in the Analysis of Variance ..... 3.399 Check  
PLAT911\_ALERT\_3\_C Missing FCF Refl Between Thmin & STh/L= 0.600 96 Report

---

#### **Alert level G**

PLAT004\_ALERT\_5\_G Polymeric Structure Found with Maximum Dimension 2 Info  
PLAT083\_ALERT\_2\_G SHELXL Second Parameter in WGHT Unusually Large 8.48 Why ?  
PLAT199\_ALERT\_1\_G Reported \_cell\_measurement\_temperature ..... (K) 293 Check  
PLAT200\_ALERT\_1\_G Reported \_diffn\_ambient\_temperature ..... (K) 293 Check  
PLAT910\_ALERT\_3\_G Missing # of FCF Reflection(s) Below Theta(Min). 1 Note  
PLAT912\_ALERT\_4\_G Missing # of FCF Reflections Above STh/L= 0.600 6 Note  
PLAT913\_ALERT\_3\_G Missing # of Very Strong Reflections in FCF .... 2 Note  
PLAT933\_ALERT\_2\_G Number of HKL-OMIT Records in Embedded .res File 8 Note  
PLAT941\_ALERT\_3\_G Average HKL Measurement Multiplicity ..... 2.8 Low  
PLAT952\_ALERT\_5\_G Calculated (ThMax) and CIF-Reported Lmax Differ. 12 Units  
PLAT958\_ALERT\_1\_G Calculated (ThMax) and Actual (FCF) Lmax Differ. 12 Units  
PLAT978\_ALERT\_2\_G Number C-C Bonds with Positive Residual Density. 0 Info

---

- 1 **ALERT level A** = Most likely a serious problem - resolve or explain  
2 **ALERT level B** = A potentially serious problem, consider carefully  
6 **ALERT level C** = Check. Ensure it is not caused by an omission or oversight  
12 **ALERT level G** = General information/check it is not something unexpected

- 3 ALERT type 1 CIF construction/syntax error, inconsistent or missing data  
6 ALERT type 2 Indicator that the structure model may be wrong or deficient  
9 ALERT type 3 Indicator that the structure quality may be low  
1 ALERT type 4 Improvement, methodology, query or suggestion  
2 ALERT type 5 Informative message, check
-

It is advisable to attempt to resolve as many as possible of the alerts in all categories. Often the minor alerts point to easily fixed oversights, errors and omissions in your CIF or refinement strategy, so attention to these fine details can be worthwhile. In order to resolve some of the more serious problems it may be necessary to carry out additional measurements or structure refinements. However, the purpose of your study may justify the reported deviations and the more serious of these should normally be commented upon in the discussion or experimental section of a paper or in the "special\_details" fields of the CIF. checkCIF was carefully designed to identify outliers and unusual parameters, but every test has its limitations and alerts that are not important in a particular case may appear. Conversely, the absence of alerts does not guarantee there are no aspects of the results needing attention. It is up to the individual to critically assess their own results and, if necessary, seek expert advice.

### **Publication of your CIF in IUCr journals**

A basic structural check has been run on your CIF. These basic checks will be run on all CIFs submitted for publication in IUCr journals (*Acta Crystallographica*, *Journal of Applied Crystallography*, *Journal of Synchrotron Radiation*); however, if you intend to submit to *Acta Crystallographica Section C* or *E* or *IUCrData*, you should make sure that **full publication checks** are run on the final version of your CIF prior to submission.

### **Publication of your CIF in other journals**

Please refer to the *Notes for Authors* of the relevant journal for any special instructions relating to CIF submission.



|                              |                                |
|------------------------------|--------------------------------|
| R(reflections)= 0.0347( 530) | wR2(reflections)= 0.0824( 651) |
| S = 1.233                    | Npar= 77                       |

---

The following ALERTS were generated. Each ALERT has the format

**test-name\_ALERT\_alert-type\_alert-level.**

Click on the hyperlinks for more details of the test.

---

 **Alert level A**

PLAT029\_ALERT\_3\_A \_diffn\_measured\_fraction\_theta\_full value Low . 0.347 Why?

---

 **Alert level B**

PLAT201\_ALERT\_2\_B Isotropic non-H Atoms in Main Residue(s) ..... 10 Report  
                  N1          N2          C1          C2          C3          etc.  
PLAT341\_ALERT\_3\_B Low Bond Precision on C-C Bonds ..... 0.02286 Ang.

---

 **Alert level C**

PLAT088\_ALERT\_3\_C Poor Data / Parameter Ratio ..... 8.45 Note  
PLAT148\_ALERT\_3\_C s.u. on the c - Axis is (Too) Large .... 0.017 Ang.  
PLAT241\_ALERT\_2\_C High 'MainMol' Ueq as Compared to Neighbors of Cu1 Check  
PLAT241\_ALERT\_2\_C High 'MainMol' Ueq as Compared to Neighbors of Cu2 Check  
PLAT906\_ALERT\_3\_C Large K Value in the Analysis of Variance ..... 2.344 Check  
PLAT911\_ALERT\_3\_C Missing FCF Refl Between Thmin & STh/L= 0.600 102 Report

---

 **Alert level G**

PLAT004\_ALERT\_5\_G Polymeric Structure Found with Maximum Dimension 2 Info  
PLAT199\_ALERT\_1\_G Reported \_cell\_measurement\_temperature ..... (K) 293 Check  
PLAT200\_ALERT\_1\_G Reported \_diffn\_ambient\_temperature ..... (K) 293 Check  
PLAT232\_ALERT\_2\_G Hirshfeld Test Diff (M-X) Br1 --Cu1\_a . 5.7 s.u.  
PLAT232\_ALERT\_2\_G Hirshfeld Test Diff (M-X) Br2 --Cu1\_f . 9.0 s.u.  
PLAT910\_ALERT\_3\_G Missing # of FCF Reflection(s) Below Theta(Min). 1 Note  
PLAT912\_ALERT\_4\_G Missing # of FCF Reflections Above STh/L= 0.600 8 Note  
PLAT913\_ALERT\_3\_G Missing # of Very Strong Reflections in FCF .... 1 Note  
PLAT941\_ALERT\_3\_G Average HKL Measurement Multiplicity ..... 3.7 Low  
PLAT952\_ALERT\_5\_G Calculated (ThMax) and CIF-Reported Lmax Differ. 12 Units  
PLAT958\_ALERT\_1\_G Calculated (ThMax) and Actual (FCF) Lmax Differ. 12 Units  
PLAT978\_ALERT\_2\_G Number C-C Bonds with Positive Residual Density. 0 Info

---

- 1 **ALERT level A** = Most likely a serious problem - resolve or explain  
2 **ALERT level B** = A potentially serious problem, consider carefully  
6 **ALERT level C** = Check. Ensure it is not caused by an omission or oversight  
12 **ALERT level G** = General information/check it is not something unexpected

- 3 ALERT type 1 CIF construction/syntax error, inconsistent or missing data  
6 ALERT type 2 Indicator that the structure model may be wrong or deficient  
9 ALERT type 3 Indicator that the structure quality may be low  
1 ALERT type 4 Improvement, methodology, query or suggestion  
2 ALERT type 5 Informative message, check
-

It is advisable to attempt to resolve as many as possible of the alerts in all categories. Often the minor alerts point to easily fixed oversights, errors and omissions in your CIF or refinement strategy, so attention to these fine details can be worthwhile. In order to resolve some of the more serious problems it may be necessary to carry out additional measurements or structure refinements. However, the purpose of your study may justify the reported deviations and the more serious of these should normally be commented upon in the discussion or experimental section of a paper or in the "special\_details" fields of the CIF. checkCIF was carefully designed to identify outliers and unusual parameters, but every test has its limitations and alerts that are not important in a particular case may appear. Conversely, the absence of alerts does not guarantee there are no aspects of the results needing attention. It is up to the individual to critically assess their own results and, if necessary, seek expert advice.

### **Publication of your CIF in IUCr journals**

A basic structural check has been run on your CIF. These basic checks will be run on all CIFs submitted for publication in IUCr journals (*Acta Crystallographica*, *Journal of Applied Crystallography*, *Journal of Synchrotron Radiation*); however, if you intend to submit to *Acta Crystallographica Section C* or *E* or *IUCrData*, you should make sure that **full publication checks** are run on the final version of your CIF prior to submission.

### **Publication of your CIF in other journals**

Please refer to the *Notes for Authors* of the relevant journal for any special instructions relating to CIF submission.



```
R(reflections)= 0.0433( 525)      wR2(reflections)=
                                0.1070( 637)
S = 1.222                        Npar= 77
```

---

The following ALERTS were generated. Each ALERT has the format

**test-name\_ALERT\_alert-type\_alert-level.**

Click on the hyperlinks for more details of the test.

---

#### **Alert level A**

PLAT029\_ALERT\_3\_A \_diffn\_measured\_fraction\_theta\_full value Low . 0.349 Why?

---

#### **Alert level B**

PLAT201\_ALERT\_2\_B Isotropic non-H Atoms in Main Residue(s) ..... 10 Report  
                  N1          N2          C1          C2          C3          etc.  
PLAT341\_ALERT\_3\_B Low Bond Precision on C-C Bonds ..... 0.03086 Ang.  
PLAT911\_ALERT\_3\_B Missing FCF Refl Between Thmin & STh/L= 0.600 250 Report

---

#### **Alert level C**

PLAT088\_ALERT\_3\_C Poor Data / Parameter Ratio ..... 8.27 Note  
PLAT148\_ALERT\_3\_C s.u. on the c - Axis is (Too) Large .... 0.020 Ang.  
PLAT241\_ALERT\_2\_C High 'MainMol' Ueq as Compared to Neighbors of Cu1 Check  
PLAT906\_ALERT\_3\_C Large K Value in the Analysis of Variance ..... 2.574 Check

---

#### **Alert level G**

PLAT004\_ALERT\_5\_G Polymeric Structure Found with Maximum Dimension 2 Info  
PLAT083\_ALERT\_2\_G SHELXL Second Parameter in WGHT Unusually Large 7.95 Why ?  
PLAT199\_ALERT\_1\_G Reported \_cell\_measurement\_temperature ..... (K) 293 Check  
PLAT200\_ALERT\_1\_G Reported \_diffn\_ambient\_temperature ..... (K) 293 Check  
PLAT232\_ALERT\_2\_G Hirshfeld Test Diff (M-X) Br2 --Cu1\_f . 5.2 s.u.  
PLAT910\_ALERT\_3\_G Missing # of FCF Reflection(s) Below Theta(Min). 1 Note  
PLAT912\_ALERT\_4\_G Missing # of FCF Reflections Above STh/L= 0.600 17 Note  
PLAT913\_ALERT\_3\_G Missing # of Very Strong Reflections in FCF .... 1 Note  
PLAT933\_ALERT\_2\_G Number of HKL-OMIT Records in Embedded .res File 2 Note  
PLAT941\_ALERT\_3\_G Average HKL Measurement Multiplicity ..... 3.1 Low  
PLAT952\_ALERT\_5\_G Calculated (ThMax) and CIF-Reported Lmax Differ. 11 Units  
PLAT958\_ALERT\_1\_G Calculated (ThMax) and Actual (FCF) Lmax Differ. 11 Units  
PLAT978\_ALERT\_2\_G Number C-C Bonds with Positive Residual Density. 1 Info

---

- 1 **ALERT level A** = Most likely a serious problem - resolve or explain  
3 **ALERT level B** = A potentially serious problem, consider carefully  
4 **ALERT level C** = Check. Ensure it is not caused by an omission or oversight  
13 **ALERT level G** = General information/check it is not something unexpected

- 3 ALERT type 1 CIF construction/syntax error, inconsistent or missing data  
6 ALERT type 2 Indicator that the structure model may be wrong or deficient  
9 ALERT type 3 Indicator that the structure quality may be low  
1 ALERT type 4 Improvement, methodology, query or suggestion  
2 ALERT type 5 Informative message, check
-

It is advisable to attempt to resolve as many as possible of the alerts in all categories. Often the minor alerts point to easily fixed oversights, errors and omissions in your CIF or refinement strategy, so attention to these fine details can be worthwhile. In order to resolve some of the more serious problems it may be necessary to carry out additional measurements or structure refinements. However, the purpose of your study may justify the reported deviations and the more serious of these should normally be commented upon in the discussion or experimental section of a paper or in the "special\_details" fields of the CIF. checkCIF was carefully designed to identify outliers and unusual parameters, but every test has its limitations and alerts that are not important in a particular case may appear. Conversely, the absence of alerts does not guarantee there are no aspects of the results needing attention. It is up to the individual to critically assess their own results and, if necessary, seek expert advice.

### **Publication of your CIF in IUCr journals**

A basic structural check has been run on your CIF. These basic checks will be run on all CIFs submitted for publication in IUCr journals (*Acta Crystallographica*, *Journal of Applied Crystallography*, *Journal of Synchrotron Radiation*); however, if you intend to submit to *Acta Crystallographica Section C* or *E* or *IUCrData*, you should make sure that **full publication checks** are run on the final version of your CIF prior to submission.

### **Publication of your CIF in other journals**

Please refer to the *Notes for Authors* of the relevant journal for any special instructions relating to CIF submission.



## checkCIF/PLATON report

Structure factors have been supplied for datablock(s) CuBr-Quin\_154GPa

THIS REPORT IS FOR GUIDANCE ONLY. IF USED AS PART OF A REVIEW PROCEDURE FOR PUBLICATION, IT SHOULD NOT REPLACE THE EXPERTISE OF AN EXPERIENCED CRYSTALLOGRAPHIC REFEREE.

No syntax errors found.      CIF dictionary      Interpreting this report

### Datablock: CuBr-Quin\_154GPa

---

|                        |                  |                                 |
|------------------------|------------------|---------------------------------|
| Bond precision:        | C-C = 0.0400 A   | Wavelength=0.71073              |
| Cell:                  | a=4.0491 (5)     | b=17.356 (2)      c=12.994 (19) |
|                        | alpha=90         | beta=93.14 (3)      gamma=90    |
| Temperature:           | 293 K            |                                 |
|                        | Calculated       | Reported                        |
| Volume                 | 911.8 (13)       | 911.8 (14)                      |
| Space group            | P 21/n           | P 1 21/n 1                      |
| Hall group             | -P 2yn           | -P 2yn                          |
| Moiety formula         | C8 H6 Br2 Cu2 N2 | C8 H6 Br2 Cu2 N2                |
| Sum formula            | C8 H6 Br2 Cu2 N2 | C8 H6 Br2 Cu2 N2                |
| Mr                     | 417.05           | 417.05                          |
| Dx, g cm <sup>-3</sup> | 3.038            | 3.038                           |
| Z                      | 4                | 4                               |
| Mu (mm <sup>-1</sup> ) | 13.378           | 13.377                          |
| F000                   | 784.0            | 784.0                           |
| F000'                  | 784.73           |                                 |
| h, k, lmax             | 5, 21, 16        | 5, 21, 5                        |
| Nref                   | 1858             | 628                             |
| Tmin, Tmax             | 0.453, 0.626     | 0.254, 0.350                    |
| Tmin'                  | 0.163            |                                 |

Correction method= # Reported T Limits: Tmin=0.254 Tmax=0.350  
AbsCorr = GAUSSIAN

Data completeness= 0.338      Theta(max)= 26.370

|                               |                                 |
|-------------------------------|---------------------------------|
| R(reflections)= 0.0489 ( 496) | wR2(reflections)= 0.1293 ( 628) |
| S = 1.228                     | Npar= 77                        |

---

The following ALERTS were generated. Each ALERT has the format

**test-name\_ALERT\_alert-type\_alert-level.**

Click on the hyperlinks for more details of the test.

---

#### **Alert level A**

PLAT029\_ALERT\_3\_A \_diffn\_measured\_fraction\_theta\_full value Low . 0.350 Why?

---

#### **Alert level B**

PLAT201\_ALERT\_2\_B Isotropic non-H Atoms in Main Residue(s) ..... 10 Report  
                  N1          N2          C1          C2          C3          etc.  
PLAT341\_ALERT\_3\_B Low Bond Precision on C-C Bonds ..... 0.04 Ang.  
PLAT911\_ALERT\_3\_B Missing FCF Refl Between Thmin & STh/L= 0.600 254 Report

---

#### **Alert level C**

PLAT088\_ALERT\_3\_C Poor Data / Parameter Ratio ..... 8.16 Note  
PLAT148\_ALERT\_3\_C s.u. on the c - Axis is (Too) Large .... 0.019 Ang.

---

#### **Alert level G**

PLAT004\_ALERT\_5\_G Polymeric Structure Found with Maximum Dimension 2 Info  
PLAT083\_ALERT\_2\_G SHELXL Second Parameter in WGHT Unusually Large 15.95 Why ?  
PLAT199\_ALERT\_1\_G Reported \_cell\_measurement\_temperature ..... (K) 293 Check  
PLAT200\_ALERT\_1\_G Reported \_diffn\_ambient\_temperature ..... (K) 293 Check  
PLAT335\_ALERT\_2\_G Check Large C6 Ring C-C Range C1 -C6 0.17 Ang.  
PLAT432\_ALERT\_2\_G Short Inter X...Y Contact Br2 ..C7 . 3.34 Ang.  
                                                          2-x,1-y,2-z = 3\_767 Check  
PLAT910\_ALERT\_3\_G Missing # of FCF Reflection(s) Below Theta(Min). 1 Note  
PLAT912\_ALERT\_4\_G Missing # of FCF Reflections Above STh/L= 0.600 15 Note  
PLAT913\_ALERT\_3\_G Missing # of Very Strong Reflections in FCF .... 1 Note  
PLAT933\_ALERT\_2\_G Number of HKL-OMIT Records in Embedded .res File 6 Note  
PLAT941\_ALERT\_3\_G Average HKL Measurement Multiplicity ..... 3.1 Low  
PLAT952\_ALERT\_5\_G Calculated (ThMax) and CIF-Reported Lmax Differ. 11 Units  
PLAT958\_ALERT\_1\_G Calculated (ThMax) and Actual (FCF) Lmax Differ. 11 Units  
PLAT978\_ALERT\_2\_G Number C-C Bonds with Positive Residual Density. 0 Info

---

- 1 **ALERT level A** = Most likely a serious problem - resolve or explain  
3 **ALERT level B** = A potentially serious problem, consider carefully  
2 **ALERT level C** = Check. Ensure it is not caused by an omission or oversight  
14 **ALERT level G** = General information/check it is not something unexpected

- 3 ALERT type 1 CIF construction/syntax error, inconsistent or missing data  
6 ALERT type 2 Indicator that the structure model may be wrong or deficient  
8 ALERT type 3 Indicator that the structure quality may be low  
1 ALERT type 4 Improvement, methodology, query or suggestion  
2 ALERT type 5 Informative message, check
-

It is advisable to attempt to resolve as many as possible of the alerts in all categories. Often the minor alerts point to easily fixed oversights, errors and omissions in your CIF or refinement strategy, so attention to these fine details can be worthwhile. In order to resolve some of the more serious problems it may be necessary to carry out additional measurements or structure refinements. However, the purpose of your study may justify the reported deviations and the more serious of these should normally be commented upon in the discussion or experimental section of a paper or in the "special\_details" fields of the CIF. checkCIF was carefully designed to identify outliers and unusual parameters, but every test has its limitations and alerts that are not important in a particular case may appear. Conversely, the absence of alerts does not guarantee there are no aspects of the results needing attention. It is up to the individual to critically assess their own results and, if necessary, seek expert advice.

### **Publication of your CIF in IUCr journals**

A basic structural check has been run on your CIF. These basic checks will be run on all CIFs submitted for publication in IUCr journals (*Acta Crystallographica*, *Journal of Applied Crystallography*, *Journal of Synchrotron Radiation*); however, if you intend to submit to *Acta Crystallographica Section C* or *E* or *IUCrData*, you should make sure that **full publication checks** are run on the final version of your CIF prior to submission.

### **Publication of your CIF in other journals**

Please refer to the *Notes for Authors* of the relevant journal for any special instructions relating to CIF submission.



## checkCIF/PLATON report

Structure factors have been supplied for datablock(s) CuBr-Quin\_192GPa

THIS REPORT IS FOR GUIDANCE ONLY. IF USED AS PART OF A REVIEW PROCEDURE FOR PUBLICATION, IT SHOULD NOT REPLACE THE EXPERTISE OF AN EXPERIENCED CRYSTALLOGRAPHIC REFEREE.

No syntax errors found.      CIF dictionary      Interpreting this report

### Datablock: CuBr-Quin\_192GPa

---

|                        |                  |                    |               |
|------------------------|------------------|--------------------|---------------|
| Bond precision:        | C-C = 0.0309 A   | Wavelength=0.71073 |               |
| Cell:                  | a=4.0427 (4)     | b=17.2708 (17)     | c=12.915 (15) |
|                        | alpha=90         | beta=93.24 (2)     | gamma=90      |
| Temperature:           | 293 K            |                    |               |
|                        | Calculated       | Reported           |               |
| Volume                 | 900.3 (11)       | 900.3 (10)         |               |
| Space group            | P 21/n           | P 1 21/n 1         |               |
| Hall group             | -P 2yn           | -P 2yn             |               |
| Moiety formula         | C8 H6 Br2 Cu2 N2 | C8 H6 Br2 Cu2 N2   |               |
| Sum formula            | C8 H6 Br2 Cu2 N2 | C8 H6 Br2 Cu2 N2   |               |
| Mr                     | 417.05           | 417.05             |               |
| Dx, g cm <sup>-3</sup> | 3.077            | 3.077              |               |
| Z                      | 4                | 4                  |               |
| Mu (mm <sup>-1</sup> ) | 13.549           | 13.549             |               |
| F000                   | 784.0            | 784.0              |               |
| F000'                  | 784.73           |                    |               |
| h, k, lmax             | 5, 21, 16        | 5, 21, 5           |               |
| Nref                   | 1831             | 623                |               |
| Tmin, Tmax             | 0.448, 0.622     | 0.248, 0.347       |               |
| Tmin'                  | 0.159            |                    |               |

Correction method= # Reported T Limits: Tmin=0.248 Tmax=0.347  
AbsCorr = GAUSSIAN

Data completeness= 0.340      Theta(max)= 26.349

|                               |                                 |
|-------------------------------|---------------------------------|
| R(reflections)= 0.0405 ( 510) | wR2(reflections)= 0.1173 ( 623) |
| S = 1.245                     | Npar= 77                        |

```
test-name ALERT alert-type alert-level.
```

 Alert level A

 **Alert level B**

- Alert level C

● Alert level G

```

3 ALERT type 1 CIF construction/syntax error, inconsistent or missing data
5 ALERT type 2 Indicator that the structure model may be wrong or deficient
8 ALERT type 3 Indicator that the structure quality may be low
1 ALERT type 4 Improvement, methodology, query or suggestion
2 ALERT type 5 Informative message, check

```

It is advisable to attempt to resolve as many as possible of the alerts in all categories. Often the minor alerts point to easily fixed oversights, errors and omissions in your CIF or refinement strategy, so attention to these fine details can be worthwhile. In order to resolve some of the more serious problems it may be necessary to carry out additional measurements or structure refinements. However, the purpose of your study may justify the reported deviations and the more serious of these should normally be commented upon in the discussion or experimental section of a paper or in the "special\_details" fields of the CIF. checkCIF was carefully designed to identify outliers and unusual parameters, but every test has its limitations and alerts that are not important in a particular case may appear. Conversely, the absence of alerts does not guarantee there are no aspects of the results needing attention. It is up to the individual to critically assess their own results and, if necessary, seek expert advice.

### **Publication of your CIF in IUCr journals**

A basic structural check has been run on your CIF. These basic checks will be run on all CIFs submitted for publication in IUCr journals (*Acta Crystallographica*, *Journal of Applied Crystallography*, *Journal of Synchrotron Radiation*); however, if you intend to submit to *Acta Crystallographica Section C* or *E* or *IUCrData*, you should make sure that **full publication checks** are run on the final version of your CIF prior to submission.

### **Publication of your CIF in other journals**

Please refer to the *Notes for Authors* of the relevant journal for any special instructions relating to CIF submission.



## checkCIF/PLATON report

Structure factors have been supplied for datablock(s) CuBr-Quin\_216GPa

THIS REPORT IS FOR GUIDANCE ONLY. IF USED AS PART OF A REVIEW PROCEDURE FOR PUBLICATION, IT SHOULD NOT REPLACE THE EXPERTISE OF AN EXPERIENCED CRYSTALLOGRAPHIC REFEREE.

No syntax errors found.      CIF dictionary      Interpreting this report

### Datablock: CuBr-Quin\_216GPa

---

|                        |                  |                                   |
|------------------------|------------------|-----------------------------------|
| Bond precision:        | C-C = 0.0486 Å   | Wavelength=0.71073                |
| Cell:                  | a=4.0458 (4)     | b=17.2700 (18)      c=12.794 (14) |
|                        | alpha=90         | beta=93.40 (2)      gamma=90      |
| Temperature:           | 293 K            |                                   |
|                        | Calculated       | Reported                          |
| Volume                 | 892.4 (10)       | 892.3 (10)                        |
| Space group            | P 21/n           | P 1 21/n 1                        |
| Hall group             | -P 2yn           | -P 2yn                            |
| Moiety formula         | C8 H6 Br2 Cu2 N2 | C8 H6 Br2 Cu2 N2                  |
| Sum formula            | C8 H6 Br2 Cu2 N2 | C8 H6 Br2 Cu2 N2                  |
| Mr                     | 417.05           | 417.05                            |
| Dx, g cm <sup>-3</sup> | 3.104            | 3.104                             |
| Z                      | 4                | 4                                 |
| Mu (mm <sup>-1</sup> ) | 13.669           | 13.670                            |
| F000                   | 784.0            | 784.0                             |
| F000'                  | 784.73           |                                   |
| h, k, lmax             | 5, 21, 15        | 5, 21, 5                          |
| Nref                   | 1811             | 618                               |
| Tmin, Tmax             | 0.445, 0.620     | 0.242, 0.345                      |
| Tmin'                  | 0.156            |                                   |

Correction method= # Reported T Limits: Tmin=0.242 Tmax=0.345  
AbsCorr = GAUSSIAN

Data completeness= 0.341      Theta(max)= 26.348

|                               |                                 |
|-------------------------------|---------------------------------|
| R(reflections)= 0.0587 ( 490) | wR2(reflections)= 0.1744 ( 618) |
| S = 1.209                     | Npar= 77                        |

```
test-name ALERT alert-type alert-level.
```

 Alert level A

 **Alert level B**

- Alert level C

● Alert level G

```
3 ALERT type 1 CIF construction/syntax error, inconsistent or missing data
9 ALERT type 2 Indicator that the structure model may be wrong or deficient
9 ALERT type 3 Indicator that the structure quality may be low
2 ALERT type 4 Improvement, methodology, query or suggestion
2 ALERT type 5 Informative message, check
```

It is advisable to attempt to resolve as many as possible of the alerts in all categories. Often the minor alerts point to easily fixed oversights, errors and omissions in your CIF or refinement strategy, so attention to these fine details can be worthwhile. In order to resolve some of the more serious problems it may be necessary to carry out additional measurements or structure refinements. However, the purpose of your study may justify the reported deviations and the more serious of these should normally be commented upon in the discussion or experimental section of a paper or in the "special\_details" fields of the CIF. checkCIF was carefully designed to identify outliers and unusual parameters, but every test has its limitations and alerts that are not important in a particular case may appear. Conversely, the absence of alerts does not guarantee there are no aspects of the results needing attention. It is up to the individual to critically assess their own results and, if necessary, seek expert advice.

### **Publication of your CIF in IUCr journals**

A basic structural check has been run on your CIF. These basic checks will be run on all CIFs submitted for publication in IUCr journals (*Acta Crystallographica*, *Journal of Applied Crystallography*, *Journal of Synchrotron Radiation*); however, if you intend to submit to *Acta Crystallographica Section C* or *E* or *IUCrData*, you should make sure that **full publication checks** are run on the final version of your CIF prior to submission.

### **Publication of your CIF in other journals**

Please refer to the *Notes for Authors* of the relevant journal for any special instructions relating to CIF submission.



```
R(reflections)= 0.0573( 446)      wR2(reflections)=
S = 1.151                        0.1592( 629)
Npar= 77
```

---

The following ALERTS were generated. Each ALERT has the format  
**test-name\_ALERT\_alert-type\_alert-level.**

Click on the hyperlinks for more details of the test.

---

### Alert level A

PLAT029\_ALERT\_3\_A \_diffn\_measured\_fraction\_theta\_full value Low . 0.369 Why?

---

### Alert level B

PLAT201\_ALERT\_2\_B Isotropic non-H Atoms in Main Residue(s) ..... 10 Report  
                  N1          N2          C1          C2          C3          etc.  
PLAT341\_ALERT\_3\_B Low Bond Precision on C-C Bonds ..... 0.04571 Ang.  
PLAT911\_ALERT\_3\_B Missing FCF Refl Between Thmin & STh/L= 0.600 360 Report

---

### Alert level C

PLAT088\_ALERT\_3\_C Poor Data / Parameter Ratio ..... 8.17 Note  
PLAT112\_ALERT\_2\_C ADDSYM Detects New (Pseudo) Symm. Elem 636 85 %Fit  
PLAT148\_ALERT\_3\_C s.u. on the c - Axis is (Too) Large .... 0.020 Ang.  
PLAT906\_ALERT\_3\_C Large K Value in the Analysis of Variance ..... 2.780 Check  
PLAT977\_ALERT\_2\_C Check Negative Difference Density on H3 . -0.35 eA-3  
PLAT977\_ALERT\_2\_C Check Negative Difference Density on H4 . -0.37 eA-3  
PLAT977\_ALERT\_2\_C Check Negative Difference Density on H8 . -0.37 eA-3

---

### Alert level G

PLAT004\_ALERT\_5\_G Polymeric Structure Found with Maximum Dimension 2 Info  
PLAT083\_ALERT\_2\_G SHELXL Second Parameter in WGHT Unusually Large 28.49 Why ?  
PLAT199\_ALERT\_1\_G Reported \_cell\_measurement\_temperature ..... (K) 293 Check  
PLAT200\_ALERT\_1\_G Reported \_diffn\_ambient\_temperature ..... (K) 293 Check  
PLAT432\_ALERT\_2\_G Short Inter X...Y Contact Br1 ..C3 . 3.31 Ang.  
                                          -1/2+x,1/2-y,1/2+z = 4\_566 Check  
PLAT432\_ALERT\_2\_G Short Inter X...Y Contact Br2 ..C7 . 3.20 Ang.  
                                          2-x,1-y,2-z = 3\_767 Check  
PLAT910\_ALERT\_3\_G Missing # of FCF Reflection(s) Below Theta(Min). 1 Note  
PLAT912\_ALERT\_4\_G Missing # of FCF Reflections Above STh/L= 0.600 27 Note  
PLAT913\_ALERT\_3\_G Missing # of Very Strong Reflections in FCF .... 2 Note  
PLAT933\_ALERT\_2\_G Number of HKL-OMIT Records in Embedded .res File 16 Note  
PLAT941\_ALERT\_3\_G Average HKL Measurement Multiplicity ..... 2.5 Low  
PLAT952\_ALERT\_5\_G Calculated (ThMax) and CIF-Reported Lmax Differ. 10 Units  
PLAT958\_ALERT\_1\_G Calculated (ThMax) and Actual (FCF) Lmax Differ. 10 Units  
PLAT978\_ALERT\_2\_G Number C-C Bonds with Positive Residual Density. 1 Info

---

- 1 **ALERT level A** = Most likely a serious problem - resolve or explain  
3 **ALERT level B** = A potentially serious problem, consider carefully  
7 **ALERT level C** = Check. Ensure it is not caused by an omission or oversight  
14 **ALERT level G** = General information/check it is not something unexpected

- 3 ALERT type 1 CIF construction/syntax error, inconsistent or missing data  
10 ALERT type 2 Indicator that the structure model may be wrong or deficient  
9 ALERT type 3 Indicator that the structure quality may be low  
1 ALERT type 4 Improvement, methodology, query or suggestion  
2 ALERT type 5 Informative message, check

---

It is advisable to attempt to resolve as many as possible of the alerts in all categories. Often the minor alerts point to easily fixed oversights, errors and omissions in your CIF or refinement strategy, so attention to these fine details can be worthwhile. In order to resolve some of the more serious problems it may be necessary to carry out additional measurements or structure refinements. However, the purpose of your study may justify the reported deviations and the more serious of these should normally be commented upon in the discussion or experimental section of a paper or in the "special\_details" fields of the CIF. checkCIF was carefully designed to identify outliers and unusual parameters, but every test has its limitations and alerts that are not important in a particular case may appear. Conversely, the absence of alerts does not guarantee there are no aspects of the results needing attention. It is up to the individual to critically assess their own results and, if necessary, seek expert advice.

### **Publication of your CIF in IUCr journals**

A basic structural check has been run on your CIF. These basic checks will be run on all CIFs submitted for publication in IUCr journals (*Acta Crystallographica*, *Journal of Applied Crystallography*, *Journal of Synchrotron Radiation*); however, if you intend to submit to *Acta Crystallographica Section C* or *E* or *IUCrData*, you should make sure that full publication checks are run on the final version of your CIF prior to submission.

### **Publication of your CIF in other journals**

Please refer to the *Notes for Authors* of the relevant journal for any special instructions relating to CIF submission.



```
R(reflections)= 0.0422( 412)      wR2(reflections)=
S = 1.193                        0.1059( 507)
Npar= 77
```

---

The following ALERTS were generated. Each ALERT has the format

**test-name\_ALERT\_alert-type\_alert-level.**

Click on the hyperlinks for more details of the test.

---

 **Alert level A**

PLAT029\_ALERT\_3\_A \_diffn\_measured\_fraction\_theta\_full value Low . 0.306 Why?

---

 **Alert level B**

PLAT088\_ALERT\_3\_B Poor Data / Parameter Ratio ..... 6.58 Note  
PLAT201\_ALERT\_2\_B Isotropic non-H Atoms in Main Residue(s) ..... 10 Report  
                  N1          N2          C1          C2          C3          etc.  
PLAT341\_ALERT\_3\_B Low Bond Precision on C-C Bonds ..... 0.03714 Ang.  
PLAT911\_ALERT\_3\_B Missing FCF Refl Between Thmin & STh/L= 0.600 335 Report

---

 **Alert level C**

PLAT112\_ALERT\_2\_C ADDSYM Detects New (Pseudo) Symm. Elem 636 85 %Fit  
PLAT234\_ALERT\_4\_C Large Hirshfeld Difference Br2 --Cu1\_f . 0.16 Ang.  
PLAT913\_ALERT\_3\_C Missing # of Very Strong Reflections in FCF .... 4 Note  
PLAT977\_ALERT\_2\_C Check Negative Difference Density on H4 . -0.42 eA-3

---

 **Alert level G**

PLAT004\_ALERT\_5\_G Polymeric Structure Found with Maximum Dimension 2 Info  
PLAT083\_ALERT\_2\_G SHELXL Second Parameter in WGHT Unusually Large 15.05 Why ?  
PLAT199\_ALERT\_1\_G Reported \_cell\_measurement\_temperature ..... (K) 293 Check  
PLAT200\_ALERT\_1\_G Reported \_diffn\_ambient\_temperature ..... (K) 293 Check  
PLAT432\_ALERT\_2\_G Short Inter X...Y Contact Br2 ..C7 . 3.23 Ang.  
                                          2-x,1-y,2-z = 3\_767 Check  
PLAT910\_ALERT\_3\_G Missing # of FCF Reflection(s) Below Theta(Min). 1 Note  
PLAT912\_ALERT\_4\_G Missing # of FCF Reflections Above STh/L= 0.600 32 Note  
PLAT933\_ALERT\_2\_G Number of HKL-OMIT Records in Embedded .res File 2 Note  
PLAT941\_ALERT\_3\_G Average HKL Measurement Multiplicity ..... 3.0 Low  
PLAT952\_ALERT\_5\_G Calculated (ThMax) and CIF-Reported Lmax Differ. 10 Units  
PLAT958\_ALERT\_1\_G Calculated (ThMax) and Actual (FCF) Lmax Differ. 10 Units  
PLAT978\_ALERT\_2\_G Number C-C Bonds with Positive Residual Density. 1 Info

---

- 1 **ALERT level A** = Most likely a serious problem - resolve or explain  
4 **ALERT level B** = A potentially serious problem, consider carefully  
4 **ALERT level C** = Check. Ensure it is not caused by an omission or oversight  
12 **ALERT level G** = General information/check it is not something unexpected

- 3 ALERT type 1 CIF construction/syntax error, inconsistent or missing data  
7 ALERT type 2 Indicator that the structure model may be wrong or deficient  
7 ALERT type 3 Indicator that the structure quality may be low  
2 ALERT type 4 Improvement, methodology, query or suggestion  
2 ALERT type 5 Informative message, check
-

It is advisable to attempt to resolve as many as possible of the alerts in all categories. Often the minor alerts point to easily fixed oversights, errors and omissions in your CIF or refinement strategy, so attention to these fine details can be worthwhile. In order to resolve some of the more serious problems it may be necessary to carry out additional measurements or structure refinements. However, the purpose of your study may justify the reported deviations and the more serious of these should normally be commented upon in the discussion or experimental section of a paper or in the "special\_details" fields of the CIF. checkCIF was carefully designed to identify outliers and unusual parameters, but every test has its limitations and alerts that are not important in a particular case may appear. Conversely, the absence of alerts does not guarantee there are no aspects of the results needing attention. It is up to the individual to critically assess their own results and, if necessary, seek expert advice.

### **Publication of your CIF in IUCr journals**

A basic structural check has been run on your CIF. These basic checks will be run on all CIFs submitted for publication in IUCr journals (*Acta Crystallographica*, *Journal of Applied Crystallography*, *Journal of Synchrotron Radiation*); however, if you intend to submit to *Acta Crystallographica Section C* or *E* or *IUCrData*, you should make sure that **full publication checks** are run on the final version of your CIF prior to submission.

### **Publication of your CIF in other journals**

Please refer to the *Notes for Authors* of the relevant journal for any special instructions relating to CIF submission.



## checkCIF/PLATON report

Structure factors have been supplied for datablock(s) CuBr-Quin\_356GPa

THIS REPORT IS FOR GUIDANCE ONLY. IF USED AS PART OF A REVIEW PROCEDURE FOR PUBLICATION, IT SHOULD NOT REPLACE THE EXPERTISE OF AN EXPERIENCED CRYSTALLOGRAPHIC REFEREE.

No syntax errors found.      CIF dictionary      Interpreting this report

### Datablock: CuBr-Quin\_356GPa

---

Bond precision:      C-C = 0.0964 Å      Wavelength=0.71073

Cell:                      a=4.0457(9)                      b=17.0296(16)                      c=12.438(5)  
                              alpha=88.73(2)                      beta=94.39(4)                      gamma=87.861(13)  
Temperature:              298 K

|                        | Calculated         | Reported         |
|------------------------|--------------------|------------------|
| Volume                 | 853.6(4)           | 853.6(4)         |
| Space group            | P -1               | P -1             |
| Hall group             | -P 1               | -P 1             |
| Moiety formula         | C16 H12 Br4 Cu4 N4 | C8 H6 Br2 Cu2 N2 |
| Sum formula            | C16 H12 Br4 Cu4 N4 | C8 H6 Br2 Cu2 N2 |
| Mr                     | 834.10             | 417.05           |
| Dx, g cm <sup>-3</sup> | 3.245              | 3.245            |
| Z                      | 2                  | 4                |
| Mu (mm <sup>-1</sup> ) | 14.290             | 14.291           |
| F000                   | 784.0              | 784.0            |
| F000'                  | 784.73             |                  |
| h, k, lmax             | 4, 18, 13          | 4, 18, 6         |
| Nref                   | 2460               | 841              |
| Tmin, Tmax             | 0.428, 0.565       | 0.254, 0.339     |
| Tmin'                  | 0.206              |                  |

Correction method= # Reported T Limits: Tmin=0.254 Tmax=0.339  
AbsCorr = GAUSSIAN

Data completeness= 0.342                      Theta(max)= 23.251

|                              |                   |
|------------------------------|-------------------|
| R(reflections)= 0.1375( 582) | wR2(reflections)= |
| S = 1.120                    | 0.3593( 841)      |
| Npar= 87                     |                   |

---

The following ALERTS were generated. Each ALERT has the format

**test-name\_ALERT\_alert-type\_alert-level.**

Click on the hyperlinks for more details of the test.

---

### Alert level A

|                   |                                          |           |       |         |      |      |
|-------------------|------------------------------------------|-----------|-------|---------|------|------|
| PLAT029_ALERT_3_A | _diffn_measured_fraction_theta_full      | value Low | 0.342 | Why?    |      |      |
| PLAT201_ALERT_2_A | Isotropic non-H Atoms in Main Residue(s) | .....     | 20    | Report  |      |      |
|                   | N1                                       | N2        | N3    | N4      | C1   | etc. |
| PLAT341_ALERT_3_A | Low Bond Precision on                    | C-C Bonds | ..... | 0.09643 | Ang. |      |

---

### Alert level B

|                   |                                                      |        |      |        |
|-------------------|------------------------------------------------------|--------|------|--------|
| THETM01_ALERT_3_B | The value of sine(theta_max)/wavelength is less than | 0.575  |      |        |
|                   | Calculated sin(theta_max)/wavelength =               | 0.5554 |      |        |
| PLAT084_ALERT_3_B | High wR2 Value (i.e. > 0.25)                         | .....  | 0.36 | Report |
| PLAT911_ALERT_3_B | Missing FCF Refl Between Thmin & STh/L=              | 0.555  | 775  | Report |

---

### Alert level C

|                   |                                                |                         |        |              |
|-------------------|------------------------------------------------|-------------------------|--------|--------------|
| PLAT042_ALERT_1_C | Calc. and Reported MoietyFormula Strings       | Differ                  |        | Please Check |
| PLAT082_ALERT_2_C | High R1 Value                                  | .....                   | 0.14   | Report       |
| PLAT088_ALERT_3_C | Poor Data / Parameter Ratio                    | .....                   | 9.67   | Note         |
| PLAT112_ALERT_2_C | ADDSYM Detects New (Pseudo) Symm. Elem         | 636                     | 85     | %Fit         |
| PLAT155_ALERT_4_C | The Triclinic Unitcell is NOT Reduced          | .....                   |        | Please Do !  |
| PLAT234_ALERT_4_C | Large Hirshfeld Difference Br1                 | --Cu4                   | 0.17   | Ang.         |
| PLAT234_ALERT_4_C | Large Hirshfeld Difference Br3                 | --Cu1                   | 0.17   | Ang.         |
| PLAT241_ALERT_2_C | High 'MainMol' Ueq as Compared to Neighbors of |                         | Cu1    | Check        |
| PLAT241_ALERT_2_C | High 'MainMol' Ueq as Compared to Neighbors of |                         | Cu2    | Check        |
| PLAT241_ALERT_2_C | High 'MainMol' Ueq as Compared to Neighbors of |                         | Cu3    | Check        |
| PLAT242_ALERT_2_C | Low 'MainMol' Ueq as Compared to Neighbors of  |                         | N1     | Check        |
| PLAT242_ALERT_2_C | Low 'MainMol' Ueq as Compared to Neighbors of  |                         | N2     | Check        |
| PLAT242_ALERT_2_C | Low 'MainMol' Ueq as Compared to Neighbors of  |                         | N3     | Check        |
| PLAT250_ALERT_2_C | Large U3/U1 Ratio for Average U(i,j) Tensor    | ....                    | 4.0    | Note         |
| PLAT334_ALERT_2_C | Small <C-C> Benzene Dist.                      | C1 -C6                  | 1.37   | Ang.         |
| PLAT334_ALERT_2_C | Small <C-C> Benzene Dist.                      | C9 -C14                 | 1.37   | Ang.         |
| PLAT733_ALERT_1_C | Torsion Calc                                   | -1(13), Rep             | -1(3)  | .....        |
|                   | C13 -C12 -C11 -C10                             | 1_555 1_555 1_555 1_555 | #      | 29 Check     |
| PLAT733_ALERT_1_C | Torsion Calc                                   | -1(13), Rep             | -2(3)  | .....        |
|                   | C9 -C10 -C11 -C12                              | 1_555 1_555 1_555 1_555 | #      | 42 Check     |
| PLAT905_ALERT_3_C | Negative K value in the Analysis of Variance   | ...                     | -3.752 | Report       |
| PLAT906_ALERT_3_C | Large K Value in the Analysis of Variance      | .....                   | 3.039  | Check        |
| PLAT971_ALERT_2_C | Check Calcd Resid. Dens.                       | 1.28Ang From Br2        | 1.75   | eA-3         |
| PLAT971_ALERT_2_C | Check Calcd Resid. Dens.                       | 1.24Ang From Br2        | 1.68   | eA-3         |
| PLAT971_ALERT_2_C | Check Calcd Resid. Dens.                       | 1.23Ang From Cu2        | 1.53   | eA-3         |
| PLAT977_ALERT_2_C | Check Negative Difference Density on H3        | .                       | -0.38  | eA-3         |
| PLAT977_ALERT_2_C | Check Negative Difference Density on H11       | .                       | -0.73  | eA-3         |
| PLAT977_ALERT_2_C | Check Negative Difference Density on H12       | .                       | -0.59  | eA-3         |

---

### Alert level G

|                   |                                                  |     |        |        |
|-------------------|--------------------------------------------------|-----|--------|--------|
| PLAT004_ALERT_5_G | Polymeric Structure Found with Maximum Dimension |     | 2      | Info   |
| PLAT045_ALERT_1_G | Calculated and Reported Z Differ by a Factor     | ... | 0.500  | Check  |
| PLAT083_ALERT_2_G | SHELXL Second Parameter in WGHT Unusually Large  |     | 273.40 | Why ?  |
| PLAT171_ALERT_4_G | The CIF-Embedded .res File Contains EADP Records |     | 4      | Report |

|                   |                                                  |       |        |
|-------------------|--------------------------------------------------|-------|--------|
| PLAT174_ALERT_4_G | The CIF-Embedded .res File Contains FLAT Records | 2     | Report |
| PLAT187_ALERT_4_G | The CIF-Embedded .res File Contains RIGU Records | 1     | Report |
| PLAT335_ALERT_2_G | Check Large C6 Ring C-C Range C1 -C6             | 0.21  | Ang.   |
| PLAT432_ALERT_2_G | Short Inter X...Y Contact Br1 ..C11 .            | 3.14  | Ang.   |
|                   | 1-x,-y,-z =                                      | 2_655 | Check  |
| PLAT432_ALERT_2_G | Short Inter X...Y Contact Br1 ..C12 .            | 3.29  | Ang.   |
|                   | 1-x,-y,-z =                                      | 2_655 | Check  |
| PLAT432_ALERT_2_G | Short Inter X...Y Contact Br1 ..C12 .            | 3.35  | Ang.   |
|                   | 2-x,-y,-z =                                      | 2_755 | Check  |
| PLAT432_ALERT_2_G | Short Inter X...Y Contact Br2 ..C7 .             | 3.09  | Ang.   |
|                   | 1-x,-y,-z =                                      | 2_655 | Check  |
| PLAT432_ALERT_2_G | Short Inter X...Y Contact Br2 ..C8 .             | 3.32  | Ang.   |
|                   | 1-x,-y,-z =                                      | 2_655 | Check  |
| PLAT432_ALERT_2_G | Short Inter X...Y Contact Br3 ..C15 .            | 3.15  | Ang.   |
|                   | 2-x,-y,1-z =                                     | 2_756 | Check  |
| PLAT432_ALERT_2_G | Short Inter X...Y Contact Br4 ..C3 .             | 3.34  | Ang.   |
|                   | 2-x,-y,1-z =                                     | 2_756 | Check  |
| PLAT860_ALERT_3_G | Number of Least-Squares Restraints .....         | 14    | Note   |
| PLAT909_ALERT_3_G | Percentage of I>2sig(I) Data at Theta(Max) Still | 93%   | Note   |
| PLAT910_ALERT_3_G | Missing # of FCF Reflection(s) Below Theta(Min). | 4     | Note   |
| PLAT933_ALERT_2_G | Number of HKL-OMIT Records in Embedded .res File | 17    | Note   |
| PLAT941_ALERT_3_G | Average HKL Measurement Multiplicity .....       | 3.4   | Low    |
| PLAT952_ALERT_5_G | Calculated (ThMax) and CIF-Reported Lmax Differ. | 7     | Units  |
| PLAT958_ALERT_1_G | Calculated (ThMax) and Actual (FCF) Lmax Differ. | 7     | Units  |
| PLAT978_ALERT_2_G | Number C-C Bonds with Positive Residual Density. | 0     | Info   |

- 
- 3 **ALERT level A** = Most likely a serious problem - resolve or explain  
 3 **ALERT level B** = A potentially serious problem, consider carefully  
 26 **ALERT level C** = Check. Ensure it is not caused by an omission or oversight  
 22 **ALERT level G** = General information/check it is not something unexpected
- 5 ALERT type 1 CIF construction/syntax error, inconsistent or missing data  
 29 ALERT type 2 Indicator that the structure model may be wrong or deficient  
 12 ALERT type 3 Indicator that the structure quality may be low  
 6 ALERT type 4 Improvement, methodology, query or suggestion  
 2 ALERT type 5 Informative message, check
-

It is advisable to attempt to resolve as many as possible of the alerts in all categories. Often the minor alerts point to easily fixed oversights, errors and omissions in your CIF or refinement strategy, so attention to these fine details can be worthwhile. In order to resolve some of the more serious problems it may be necessary to carry out additional measurements or structure refinements. However, the purpose of your study may justify the reported deviations and the more serious of these should normally be commented upon in the discussion or experimental section of a paper or in the "special\_details" fields of the CIF. checkCIF was carefully designed to identify outliers and unusual parameters, but every test has its limitations and alerts that are not important in a particular case may appear. Conversely, the absence of alerts does not guarantee there are no aspects of the results needing attention. It is up to the individual to critically assess their own results and, if necessary, seek expert advice.

### **Publication of your CIF in IUCr journals**

A basic structural check has been run on your CIF. These basic checks will be run on all CIFs submitted for publication in IUCr journals (*Acta Crystallographica*, *Journal of Applied Crystallography*, *Journal of Synchrotron Radiation*); however, if you intend to submit to *Acta Crystallographica Section C* or *E* or *IUCrData*, you should make sure that **full publication checks** are run on the final version of your CIF prior to submission.

### **Publication of your CIF in other journals**

Please refer to the *Notes for Authors* of the relevant journal for any special instructions relating to CIF submission.



## checkCIF/PLATON report

Structure factors have been supplied for datablock(s) CuBr-Quin\_397GPa

THIS REPORT IS FOR GUIDANCE ONLY. IF USED AS PART OF A REVIEW PROCEDURE FOR PUBLICATION, IT SHOULD NOT REPLACE THE EXPERTISE OF AN EXPERIENCED CRYSTALLOGRAPHIC REFEREE.

No syntax errors found.      CIF dictionary      Interpreting this report

### Datablock: CuBr-Quin\_397GPa

---

Bond precision:      C-C = 0.0929 Å      Wavelength=0.71073

Cell:                      a=4.0608(10)                      b=16.9204(19)                      c=12.376(5)  
                                alpha=88.34(2)                      beta=94.54(4)                      gamma=86.499(15)  
Temperature:              298 K

|                        | Calculated         | Reported         |
|------------------------|--------------------|------------------|
| Volume                 | 845.6(4)           | 845.7(4)         |
| Space group            | P -1               | P -1             |
| Hall group             | -P 1               | -P 1             |
| Moiety formula         | C16 H12 Br4 Cu4 N4 | C8 H6 Br2 Cu2 N2 |
| Sum formula            | C16 H12 Br4 Cu4 N4 | C8 H6 Br2 Cu2 N2 |
| Mr                     | 834.10             | 417.05           |
| Dx, g cm <sup>-3</sup> | 3.276              | 3.276            |
| Z                      | 2                  | 4                |
| Mu (mm <sup>-1</sup> ) | 14.425             | 14.424           |
| F000                   | 784.0              | 784.0            |
| F000'                  | 784.73             |                  |
| h, k, lmax             | 4, 18, 13          | 4, 18, 6         |
| Nref                   | 2442               | 871              |
| Tmin, Tmax             | 0.425, 0.562       | 0.247, 0.336     |
| Tmin'                  | 0.203              |                  |

Correction method= # Reported T Limits: Tmin=0.247 Tmax=0.336  
AbsCorr = GAUSSIAN

Data completeness= 0.357      Theta(max)= 23.256

|                              |                   |
|------------------------------|-------------------|
| R(reflections)= 0.1372( 586) | wR2(reflections)= |
| S = 1.170                    | 0.3637( 871)      |
| Npar= 87                     |                   |

---

The following ALERTS were generated. Each ALERT has the format

**test-name\_ALERT\_alert-type\_alert-level.**

Click on the hyperlinks for more details of the test.

---

#### Alert level A

|                   |                                          |           |       |         |      |      |
|-------------------|------------------------------------------|-----------|-------|---------|------|------|
| PLAT029_ALERT_3_A | _diffn_measured_fraction_theta_full      | value Low | 0.357 | Why?    |      |      |
| PLAT201_ALERT_2_A | Isotropic non-H Atoms in Main Residue(s) | .....     | 20    | Report  |      |      |
|                   | N1                                       | N2        | N3    | N4      | C1   | etc. |
| PLAT341_ALERT_3_A | Low Bond Precision on                    | C-C Bonds | ..... | 0.09286 | Ang. |      |

---

#### Alert level B

|                   |                                                      |        |      |        |
|-------------------|------------------------------------------------------|--------|------|--------|
| THETM01_ALERT_3_B | The value of sine(theta_max)/wavelength is less than | 0.575  |      |        |
|                   | Calculated sin(theta_max)/wavelength =               | 0.5555 |      |        |
| PLAT084_ALERT_3_B | High wR2 Value (i.e. > 0.25)                         | .....  | 0.36 | Report |
| PLAT911_ALERT_3_B | Missing FCF Refl Between Thmin & Sth/L=              | 0.556  | 739  | Report |

---

#### Alert level C

|                   |                                             |        |        |              |
|-------------------|---------------------------------------------|--------|--------|--------------|
| PLAT042_ALERT_1_C | Calc. and Reported MoietyFormula Strings    | Differ |        | Please Check |
| PLAT082_ALERT_2_C | High R1 Value                               | .....  | 0.14   | Report       |
| PLAT112_ALERT_2_C | ADDSYM Detects New (Pseudo) Symm. Elem      | 636    | 85     | %Fit         |
| PLAT155_ALERT_4_C | The Triclinic Unitcell is NOT Reduced       | .....  |        | Please Do !  |
| PLAT250_ALERT_2_C | Large U3/U1 Ratio for Average U(i,j) Tensor | ....   | 2.4    | Note         |
| PLAT906_ALERT_3_C | Large K Value in the Analysis of Variance   | .....  | 25.024 | Check        |
| PLAT906_ALERT_3_C | Large K Value in the Analysis of Variance   | .....  | 3.863  | Check        |
| PLAT977_ALERT_2_C | Check Negative Difference Density on H8     | .      | -0.39  | eA-3         |
| PLAT977_ALERT_2_C | Check Negative Difference Density on H13    | .      | -0.40  | eA-3         |
| PLAT977_ALERT_2_C | Check Negative Difference Density on H15    | .      | -0.53  | eA-3         |

---

#### Alert level G

|                   |                                                  |              |        |        |
|-------------------|--------------------------------------------------|--------------|--------|--------|
| PLAT004_ALERT_5_G | Polymeric Structure Found with Maximum Dimension |              | 2      | Info   |
| PLAT045_ALERT_1_G | Calculated and Reported Z Differ by a Factor ... |              | 0.500  | Check  |
| PLAT072_ALERT_2_G | SHELXL First Parameter in WGHT Unusually Large   |              | 0.12   | Report |
| PLAT083_ALERT_2_G | SHELXL Second Parameter in WGHT Unusually Large  |              | 189.62 | Why ?  |
| PLAT171_ALERT_4_G | The CIF-Embedded .res File Contains EADP Records |              | 4      | Report |
| PLAT174_ALERT_4_G | The CIF-Embedded .res File Contains FLAT Records |              | 2      | Report |
| PLAT187_ALERT_4_G | The CIF-Embedded .res File Contains RIGU Records |              | 1      | Report |
| PLAT333_ALERT_2_G | Large Aver C6-Ring C-C Dist C9                   | -C14         | 1.44   | Ang.   |
| PLAT335_ALERT_2_G | Check Large C6 Ring C-C Range C1                 | -C6          | 0.21   | Ang.   |
| PLAT432_ALERT_2_G | Short Inter X...Y Contact                        | Br1 ..C11    | 3.14   | Ang.   |
|                   |                                                  | 1-x,-y,-z =  | 2_655  | Check  |
| PLAT432_ALERT_2_G | Short Inter X...Y Contact                        | Br2 ..C7     | 3.14   | Ang.   |
|                   |                                                  | 1-x,-y,-z =  | 2_655  | Check  |
| PLAT432_ALERT_2_G | Short Inter X...Y Contact                        | Br2 ..C8     | 3.27   | Ang.   |
|                   |                                                  | 1-x,-y,-z =  | 2_655  | Check  |
| PLAT432_ALERT_2_G | Short Inter X...Y Contact                        | Br3 ..C15    | 3.00   | Ang.   |
|                   |                                                  | 2-x,-y,1-z = | 2_756  | Check  |
| PLAT432_ALERT_2_G | Short Inter X...Y Contact                        | Br4 ..C4     | 3.29   | Ang.   |
|                   |                                                  | 2-x,-y,1-z = | 2_756  | Check  |
| PLAT432_ALERT_2_G | Short Inter X...Y Contact                        | Br4 ..C3     | 3.31   | Ang.   |
|                   |                                                  | 2-x,-y,1-z = | 2_756  | Check  |
| PLAT432_ALERT_2_G | Short Inter X...Y Contact                        | Br4 ..C3     | 3.35   | Ang.   |

|                   | 1-x,-y,1-z =                                     | 2_656 | Check |
|-------------------|--------------------------------------------------|-------|-------|
| PLAT860_ALERT_3_G | Number of Least-Squares Restraints .....         | 14    | Note  |
| PLAT909_ALERT_3_G | Percentage of I>2sig(I) Data at Theta(Max) Still | 97%   | Note  |
| PLAT910_ALERT_3_G | Missing # of FCF Reflection(s) Below Theta(Min). | 4     | Note  |
| PLAT933_ALERT_2_G | Number of HKL-OMIT Records in Embedded .res File | 12    | Note  |
| PLAT941_ALERT_3_G | Average HKL Measurement Multiplicity .....       | 2.5   | Low   |
| PLAT952_ALERT_5_G | Calculated (ThMax) and CIF-Reported Lmax Differ. | 7     | Units |
| PLAT958_ALERT_1_G | Calculated (ThMax) and Actual (FCF) Lmax Differ. | 7     | Units |
| PLAT978_ALERT_2_G | Number C-C Bonds with Positive Residual Density. | 0     | Info  |

---

3 **ALERT level A** = Most likely a serious problem - resolve or explain  
3 **ALERT level B** = A potentially serious problem, consider carefully  
10 **ALERT level C** = Check. Ensure it is not caused by an omission or oversight  
24 **ALERT level G** = General information/check it is not something unexpected

3 ALERT type 1 CIF construction/syntax error, inconsistent or missing data  
20 ALERT type 2 Indicator that the structure model may be wrong or deficient  
11 ALERT type 3 Indicator that the structure quality may be low  
4 ALERT type 4 Improvement, methodology, query or suggestion  
2 ALERT type 5 Informative message, check

---

It is advisable to attempt to resolve as many as possible of the alerts in all categories. Often the minor alerts point to easily fixed oversights, errors and omissions in your CIF or refinement strategy, so attention to these fine details can be worthwhile. In order to resolve some of the more serious problems it may be necessary to carry out additional measurements or structure refinements. However, the purpose of your study may justify the reported deviations and the more serious of these should normally be commented upon in the discussion or experimental section of a paper or in the "special\_details" fields of the CIF. checkCIF was carefully designed to identify outliers and unusual parameters, but every test has its limitations and alerts that are not important in a particular case may appear. Conversely, the absence of alerts does not guarantee there are no aspects of the results needing attention. It is up to the individual to critically assess their own results and, if necessary, seek expert advice.

### Publication of your CIF in IUCr journals

A basic structural check has been run on your CIF. These basic checks will be run on all CIFs submitted for publication in IUCr journals (*Acta Crystallographica*, *Journal of Applied Crystallography*, *Journal of Synchrotron Radiation*); however, if you intend to submit to *Acta Crystallographica Section C* or *E* or *IUCrData*, you should make sure that **full publication checks** are run on the final version of your CIF prior to submission.

### Publication of your CIF in other journals

Please refer to the *Notes for Authors* of the relevant journal for any special instructions relating to CIF submission.



## checkCIF/PLATON report

Structure factors have been supplied for datablock(s) CuBr-Quin\_462GPa

THIS REPORT IS FOR GUIDANCE ONLY. IF USED AS PART OF A REVIEW PROCEDURE FOR PUBLICATION, IT SHOULD NOT REPLACE THE EXPERTISE OF AN EXPERIENCED CRYSTALLOGRAPHIC REFEREE.

No syntax errors found.      CIF dictionary      Interpreting this report

### Datablock: CuBr-Quin\_462GPa

---

Bond precision:      C-C = 0.1093 Å      Wavelength=0.71073

Cell:                      a=4.0605(12)                      b=16.839(3)                      c=12.287(7)  
                             alpha=88.48(3)                      beta=94.88(5)                      gamma=86.038(18)  
Temperature:              298 K

|                        | Calculated         | Reported         |
|------------------------|--------------------|------------------|
| Volume                 | 834.6(6)           | 834.6(6)         |
| Space group            | P -1               | P -1             |
| Hall group             | -P 1               | -P 1             |
| Moiety formula         | C16 H12 Br4 Cu4 N4 | C8 H6 Br2 Cu2 N2 |
| Sum formula            | C16 H12 Br4 Cu4 N4 | C8 H6 Br2 Cu2 N2 |
| Mr                     | 834.10             | 417.05           |
| Dx, g cm <sup>-3</sup> | 3.319              | 3.319            |
| Z                      | 2                  | 4                |
| Mu (mm <sup>-1</sup> ) | 14.615             | 14.616           |
| F000                   | 784.0              | 784.0            |
| F000'                  | 784.73             |                  |
| h, k, lmax             | 4, 18, 13          | 4, 18, 6         |
| Nref                   | 2405               | 883              |
| Tmin, Tmax             | 0.420, 0.557       | 0.246, 0.336     |
| Tmin'                  | 0.128              |                  |

Correction method= # Reported T Limits: Tmin=0.246 Tmax=0.336  
AbsCorr = GAUSSIAN

Data completeness= 0.367      Theta(max)= 23.231

|                              |                   |
|------------------------------|-------------------|
| R(reflections)= 0.1575( 558) | wR2(reflections)= |
| S = 1.156                    | 0.4130( 883)      |
| Npar= 87                     |                   |

---

The following ALERTS were generated. Each ALERT has the format

**test-name\_ALERT\_alert-type\_alert-level.**

Click on the hyperlinks for more details of the test.

---

### Alert level A

|                   |                                          |           |       |         |      |      |
|-------------------|------------------------------------------|-----------|-------|---------|------|------|
| PLAT029_ALERT_3_A | _diffn_measured_fraction_theta_full      | value Low | 0.367 | Why?    |      |      |
| PLAT201_ALERT_2_A | Isotropic non-H Atoms in Main Residue(s) | .....     | 20    | Report  |      |      |
|                   | N1                                       | N2        | N3    | N4      | C1   | etc. |
| PLAT341_ALERT_3_A | Low Bond Precision on                    | C-C Bonds | ..... | 0.10929 | Ang. |      |

---

### Alert level B

|                   |                                                            |             |      |             |       |       |       |       |   |    |       |
|-------------------|------------------------------------------------------------|-------------|------|-------------|-------|-------|-------|-------|---|----|-------|
| THETM01_ALERT_3_B | The value of sine(theta_max)/wavelength is less than 0.575 |             |      |             |       |       |       |       |   |    |       |
|                   | Calculated sin(theta_max)/wavelength =                     | 0.5550      |      |             |       |       |       |       |   |    |       |
| PLAT082_ALERT_2_B | High R1 Value                                              | .....       | 0.16 | Report      |       |       |       |       |   |    |       |
| PLAT084_ALERT_3_B | High wR2 Value (i.e. > 0.25)                               | .....       | 0.41 | Report      |       |       |       |       |   |    |       |
| PLAT733_ALERT_1_B | Torsion Calc                                               | -1(13), Rep | 0(2) | 6.50 s.u.-R |       |       |       |       |   |    |       |
|                   | C9                                                         | -C10        | -C11 | -C12        | 1_555 | 1_555 | 1_555 | 1_555 | # | 42 | Check |
| PLAT911_ALERT_3_B | Missing FCF Refl Between Thmin & STh/L=                    | 0.555       | 710  | Report      |       |       |       |       |   |    |       |

---

### Alert level C

|                   |                                                 |                            |
|-------------------|-------------------------------------------------|----------------------------|
| PLAT042_ALERT_1_C | Calc. and Reported MoietyFormula Strings Differ | Please Check               |
| PLAT112_ALERT_2_C | ADDSYM Detects New (Pseudo) Symm. Elem          | 636 85 %Fit                |
| PLAT155_ALERT_4_C | The Triclinic Unitcell is NOT Reduced           | ..... Please Do !          |
| PLAT250_ALERT_2_C | Large U3/U1 Ratio for Average U(i,j) Tensor     | .... 3.3 Note              |
| PLAT369_ALERT_2_C | Long C(sp2)-C(sp2) Bond                         | C15 - C16 1.54 Ang.        |
| PLAT906_ALERT_3_C | Large K Value in the Analysis of Variance       | ..... 56.986 Check         |
| PLAT906_ALERT_3_C | Large K Value in the Analysis of Variance       | ..... 7.888 Check          |
| PLAT971_ALERT_2_C | Check Calcd Resid. Dens.                        | 1.04Ang From Br3 1.91 eA-3 |
| PLAT971_ALERT_2_C | Check Calcd Resid. Dens.                        | 0.98Ang From N3 1.59 eA-3  |
| PLAT977_ALERT_2_C | Check Negative Difference Density on H11        | . -0.88 eA-3               |
| PLAT977_ALERT_2_C | Check Negative Difference Density on H12        | . -0.69 eA-3               |
| PLAT977_ALERT_2_C | Check Negative Difference Density on H13        | . -0.34 eA-3               |
| PLAT977_ALERT_2_C | Check Negative Difference Density on H15        | . -0.83 eA-3               |
| PLAT977_ALERT_2_C | Check Negative Difference Density on H16        | . -0.37 eA-3               |

---

### Alert level G

|                   |                                                  |                     |
|-------------------|--------------------------------------------------|---------------------|
| PLAT004_ALERT_5_G | Polymeric Structure Found with Maximum Dimension | 2 Info              |
| PLAT045_ALERT_1_G | Calculated and Reported Z Differ by a Factor ... | 0.500 Check         |
| PLAT072_ALERT_2_G | SHELXL First Parameter in WGHT Unusually Large   | 0.12 Report         |
| PLAT083_ALERT_2_G | SHELXL Second Parameter in WGHT Unusually Large  | 263.92 Why ?        |
| PLAT171_ALERT_4_G | The CIF-Embedded .res File Contains EADP Records | 4 Report            |
| PLAT174_ALERT_4_G | The CIF-Embedded .res File Contains FLAT Records | 2 Report            |
| PLAT187_ALERT_4_G | The CIF-Embedded .res File Contains RIGU Records | 1 Report            |
| PLAT335_ALERT_2_G | Check Large C6 Ring C-C Range C1                 | -C6 0.20 Ang.       |
| PLAT432_ALERT_2_G | Short Inter X...Y Contact                        | Br1 ..C11 3.06 Ang. |
|                   | 1-x,-y,-z =                                      | 2_655 Check         |
| PLAT432_ALERT_2_G | Short Inter X...Y Contact                        | Br2 ..C7 3.16 Ang.  |
|                   | 1-x,-y,-z =                                      | 2_655 Check         |
| PLAT432_ALERT_2_G | Short Inter X...Y Contact                        | Br2 ..C8 3.18 Ang.  |
|                   | 1-x,-y,-z =                                      | 2_655 Check         |
| PLAT432_ALERT_2_G | Short Inter X...Y Contact                        | Br3 ..C15 3.02 Ang. |

|                                                                    |     |                      |   |                          |
|--------------------------------------------------------------------|-----|----------------------|---|--------------------------|
| PLAT432_ALERT_2_G Short Inter X...Y Contact                        | Br4 | 2-x,-y,1-z =<br>..C4 | . | 2_756 Check<br>3.14 Ang. |
| PLAT432_ALERT_2_G Short Inter X...Y Contact                        | Br4 | 2-x,-y,1-z =<br>..C3 | . | 2_756 Check<br>3.25 Ang. |
| PLAT432_ALERT_2_G Short Inter X...Y Contact                        | Br4 | 2-x,-y,1-z =<br>..C3 | . | 2_756 Check<br>3.32 Ang. |
| PLAT432_ALERT_2_G Short Inter X...Y Contact                        | Br4 | 1-x,-y,1-z =<br>..C4 | . | 2_656 Check<br>3.35 Ang. |
| PLAT860_ALERT_3_G Number of Least-Squares Restraints               |     | 1-x,-y,1-z =         |   | 2_656 Check              |
| PLAT909_ALERT_3_G Percentage of I>2sig(I) Data at Theta(Max)       |     |                      |   | 14 Note                  |
| PLAT910_ALERT_3_G Missing # of FCF Reflection(s) Below Theta(Min)  |     |                      |   | 68% Note                 |
| PLAT933_ALERT_2_G Number of HKL-OMIT Records in Embedded .res File |     |                      |   | 4 Note                   |
| PLAT941_ALERT_3_G Average HKL Measurement Multiplicity             |     |                      |   | 18 Note                  |
| PLAT952_ALERT_5_G Calculated (ThMax) and CIF-Reported Lmax Differ. |     |                      |   | 2.7 Low                  |
| PLAT958_ALERT_1_G Calculated (ThMax) and Actual (FCF) Lmax Differ. |     |                      |   | 7 Units                  |
| PLAT978_ALERT_2_G Number C-C Bonds with Positive Residual Density. |     |                      |   | 7 Units                  |
|                                                                    |     |                      |   | 0 Info                   |

---

3 **ALERT level A** = Most likely a serious problem - resolve or explain  
 5 **ALERT level B** = A potentially serious problem, consider carefully  
 14 **ALERT level C** = Check. Ensure it is not caused by an omission or oversight  
 24 **ALERT level G** = General information/check it is not something unexpected

4 ALERT type 1 CIF construction/syntax error, inconsistent or missing data  
 25 ALERT type 2 Indicator that the structure model may be wrong or deficient  
 11 ALERT type 3 Indicator that the structure quality may be low  
 4 ALERT type 4 Improvement, methodology, query or suggestion  
 2 ALERT type 5 Informative message, check

---

It is advisable to attempt to resolve as many as possible of the alerts in all categories. Often the minor alerts point to easily fixed oversights, errors and omissions in your CIF or refinement strategy, so attention to these fine details can be worthwhile. In order to resolve some of the more serious problems it may be necessary to carry out additional measurements or structure refinements. However, the purpose of your study may justify the reported deviations and the more serious of these should normally be commented upon in the discussion or experimental section of a paper or in the "special\_details" fields of the CIF. checkCIF was carefully designed to identify outliers and unusual parameters, but every test has its limitations and alerts that are not important in a particular case may appear. Conversely, the absence of alerts does not guarantee there are no aspects of the results needing attention. It is up to the individual to critically assess their own results and, if necessary, seek expert advice.

### **Publication of your CIF in IUCr journals**

A basic structural check has been run on your CIF. These basic checks will be run on all CIFs submitted for publication in IUCr journals (*Acta Crystallographica*, *Journal of Applied Crystallography*, *Journal of Synchrotron Radiation*); however, if you intend to submit to *Acta Crystallographica Section C* or *E* or *IUCrData*, you should make sure that **full publication checks** are run on the final version of your CIF prior to submission.

### **Publication of your CIF in other journals**

Please refer to the *Notes for Authors* of the relevant journal for any special instructions relating to CIF submission.



## checkCIF/PLATON report

You have not supplied any structure factors. As a result the full set of tests cannot be run.

THIS REPORT IS FOR GUIDANCE ONLY. IF USED AS PART OF A REVIEW PROCEDURE FOR PUBLICATION, IT SHOULD NOT REPLACE THE EXPERTISE OF AN EXPERIENCED CRYSTALLOGRAPHIC REFEREE.

No syntax errors found.      CIF dictionary      Interpreting this report

### Datablock: CuI-Quin\_000GPa

---

|                        |                 |                    |              |
|------------------------|-----------------|--------------------|--------------|
| Bond precision:        | C-C = 0.0096 Å  | Wavelength=0.71073 |              |
| Cell:                  | a=4.3719(2)     | b=17.7203(8)       | c=13.8614(6) |
|                        | alpha=90        | beta=92.886(4)     | gamma=90     |
| Temperature:           | 298 K           |                    |              |
|                        | Calculated      | Reported           |              |
| Volume                 | 1072.50(8)      | 1072.50(8)         |              |
| Space group            | P 21/n          | P 1 21/n 1         |              |
| Hall group             | -P 2yn          | -P 2yn             |              |
| Moiety formula         | C8 H6 Cu2 I2 N2 | C8 H6 Cu2 I2 N2    |              |
| Sum formula            | C8 H6 Cu2 I2 N2 | C8 H6 Cu2 I2 N2    |              |
| Mr                     | 511.05          | 511.03             |              |
| Dx, g cm <sup>-3</sup> | 3.165           | 3.165              |              |
| Z                      | 4               | 4                  |              |
| Mu (mm <sup>-1</sup> ) | 9.680           | 9.680              |              |
| F000                   | 928.0           | 928.0              |              |
| F000'                  | 927.07          |                    |              |
| h, k, lmax             | 5, 22, 17       | 5, 22, 17          |              |
| Nref                   | 2197            | 2198               |              |
| Tmin, Tmax             | 0.705, 0.873    | 0.665, 0.905       |              |
| Tmin'                  | 0.488           |                    |              |

Correction method= # Reported T Limits: Tmin=0.665 Tmax=0.905  
AbsCorr = GAUSSIAN

Data completeness= 1.000      Theta(max)= 26.370

|                               |                                 |
|-------------------------------|---------------------------------|
| R(reflections)= 0.0376( 1838) | wR2(reflections)= 0.0681( 2198) |
| S = 1.055                     | Npar= 127                       |

---

The following ALERTS were generated. Each ALERT has the format

**test-name\_ALERT\_alert-type\_alert-level.**

Click on the hyperlinks for more details of the test.

---



#### **Alert level B**

PLAT196\_ALERT\_1\_B No TEMP record and \_measurement\_temperature .NE. 293 Degree

---



#### **Alert level C**

PLAT342\_ALERT\_3\_C Low Bond Precision on C-C Bonds ..... 0.00957 Ang.

---



#### **Alert level G**

PLAT004\_ALERT\_5\_G Polymeric Structure Found with Maximum Dimension 2 Info  
PLAT012\_ALERT\_1\_G No \_shelx\_res\_checksum Found in CIF ..... Please Check  
PLAT232\_ALERT\_2\_G Hirshfeld Test Diff (M-X) I1 --Cu1 . 17.5 s.u.  
PLAT232\_ALERT\_2\_G Hirshfeld Test Diff (M-X) I1 --Cu1\_a . 29.2 s.u.  
PLAT232\_ALERT\_2\_G Hirshfeld Test Diff (M-X) I1 --Cu2\_c . 24.0 s.u.  
PLAT232\_ALERT\_2\_G Hirshfeld Test Diff (M-X) I2 --Cu2 . 16.8 s.u.  
PLAT232\_ALERT\_2\_G Hirshfeld Test Diff (M-X) I2 --Cu2\_b . 26.3 s.u.  
PLAT232\_ALERT\_2\_G Hirshfeld Test Diff (M-X) I2 --Cu1\_f . 21.7 s.u.  
PLAT941\_ALERT\_3\_G Average HKL Measurement Multiplicity ..... 1.8 Low

---

- 0 **ALERT level A** = Most likely a serious problem - resolve or explain  
1 **ALERT level B** = A potentially serious problem, consider carefully  
1 **ALERT level C** = Check. Ensure it is not caused by an omission or oversight  
9 **ALERT level G** = General information/check it is not something unexpected

- 2 ALERT type 1 CIF construction/syntax error, inconsistent or missing data  
6 ALERT type 2 Indicator that the structure model may be wrong or deficient  
2 ALERT type 3 Indicator that the structure quality may be low  
0 ALERT type 4 Improvement, methodology, query or suggestion  
1 ALERT type 5 Informative message, check
-

It is advisable to attempt to resolve as many as possible of the alerts in all categories. Often the minor alerts point to easily fixed oversights, errors and omissions in your CIF or refinement strategy, so attention to these fine details can be worthwhile. In order to resolve some of the more serious problems it may be necessary to carry out additional measurements or structure refinements. However, the purpose of your study may justify the reported deviations and the more serious of these should normally be commented upon in the discussion or experimental section of a paper or in the "special\_details" fields of the CIF. checkCIF was carefully designed to identify outliers and unusual parameters, but every test has its limitations and alerts that are not important in a particular case may appear. Conversely, the absence of alerts does not guarantee there are no aspects of the results needing attention. It is up to the individual to critically assess their own results and, if necessary, seek expert advice.

### **Publication of your CIF in IUCr journals**

A basic structural check has been run on your CIF. These basic checks will be run on all CIFs submitted for publication in IUCr journals (*Acta Crystallographica*, *Journal of Applied Crystallography*, *Journal of Synchrotron Radiation*); however, if you intend to submit to *Acta Crystallographica Section C* or *E* or *IUCrData*, you should make sure that **full publication checks** are run on the final version of your CIF prior to submission.

### **Publication of your CIF in other journals**

Please refer to the *Notes for Authors* of the relevant journal for any special instructions relating to CIF submission.





---

The following ALERTS were generated. Each ALERT has the format

**test-name\_ALERT\_alert-type\_alert-level.**

Click on the hyperlinks for more details of the test.

---

 **Alert level A**

|                                                                    |             |
|--------------------------------------------------------------------|-------------|
| PLAT051_ALERT_1_A Mu(calc) and Mu(CIF) Ratio Differs from 1.0 by . | 57.11 %     |
| PLAT660_ALERT_1_A No Valid _diffrn_radiation_type Value Reported . | Please Do ! |

---

 **Alert level B**

|                                                                                    |              |
|------------------------------------------------------------------------------------|--------------|
| PLAT196_ALERT_1_B No TEMP record and _measurement_temperature .NE.                 | 293 Degree   |
| PLAT201_ALERT_2_B Isotropic non-H Atoms in Main Residue(s) .....                   | 10 Report    |
| N1                  N2                  C1                  C2                  C3 | etc.         |
| PLAT342_ALERT_3_B Low Bond Precision on C-C Bonds .....                            | 0.03557 Ang. |

---

 **Alert level C**

|                                                                                             |           |
|---------------------------------------------------------------------------------------------|-----------|
| PLAT234_ALERT_4_C Large Hirshfeld Difference I1                  --Cu2_c                  . | 0.16 Ang. |
| PLAT241_ALERT_2_C High 'MainMol' Ueq as Compared to Neighbors of                            | Cu2 Check |

---

 **Alert level G**

|                                                                              |               |
|------------------------------------------------------------------------------|---------------|
| PLAT004_ALERT_5_G Polymeric Structure Found with Maximum Dimension           | 2 Info        |
| PLAT012_ALERT_1_G No                  _shelx_res_checksum Found in CIF ..... | Please Check  |
| PLAT019_ALERT_1_G _diffrn_measured_fraction_theta_full/*_max < 1.0           | 0.993 Report  |
| PLAT072_ALERT_2_G SHELXL First Parameter in WGHT Unusually Large             | 0.12 Report   |
| PLAT092_ALERT_4_G Check: Wavelength Given is not Cu,Ga,Mo,Ag,In Ka           | 0.31850 Ang.  |
| PLAT941_ALERT_3_G Average HKL Measurement Multiplicity .....                 | 1.9 Low       |
| PLAT952_ALERT_5_G Calculated (ThMax) and CIF-Reported Lmax Differ.           | 9 Units       |
| PLAT984_ALERT_1_G The C-f' = 0.0033 Deviates from the B&C-Value              | -0.0008 Check |
| PLAT984_ALERT_1_G The Cu-f' = 0.3201 Deviates from the B&C-Value             | 0.1660 Check  |
| PLAT984_ALERT_1_G The I-f' = -0.4742 Deviates from the B&C-Value             | -0.8576 Check |
| PLAT984_ALERT_1_G The N-f' = 0.0061 Deviates from the B&C-Value              | -0.0009 Check |
| PLAT985_ALERT_1_G The C-f" = 0.0016 Deviates from the B&C-Value              | 0.0003 Check  |
| PLAT985_ALERT_1_G The Cu-f" = 1.2651 Deviates from the B&C-Value             | 0.2861 Check  |
| PLAT985_ALERT_1_G The I-f" = 1.8119 Deviates from the B&C-Value              | 2.7116 Check  |
| PLAT985_ALERT_1_G The N-f" = 0.0033 Deviates from the B&C-Value              | 0.0005 Check  |

---

- 2 **ALERT level A** = Most likely a serious problem - resolve or explain  
3 **ALERT level B** = A potentially serious problem, consider carefully  
2 **ALERT level C** = Check. Ensure it is not caused by an omission or oversight  
15 **ALERT level G** = General information/check it is not something unexpected

- 13 ALERT type 1 CIF construction/syntax error, inconsistent or missing data  
3 ALERT type 2 Indicator that the structure model may be wrong or deficient  
2 ALERT type 3 Indicator that the structure quality may be low  
2 ALERT type 4 Improvement, methodology, query or suggestion  
2 ALERT type 5 Informative message, check
-

It is advisable to attempt to resolve as many as possible of the alerts in all categories. Often the minor alerts point to easily fixed oversights, errors and omissions in your CIF or refinement strategy, so attention to these fine details can be worthwhile. In order to resolve some of the more serious problems it may be necessary to carry out additional measurements or structure refinements. However, the purpose of your study may justify the reported deviations and the more serious of these should normally be commented upon in the discussion or experimental section of a paper or in the "special\_details" fields of the CIF. checkCIF was carefully designed to identify outliers and unusual parameters, but every test has its limitations and alerts that are not important in a particular case may appear. Conversely, the absence of alerts does not guarantee there are no aspects of the results needing attention. It is up to the individual to critically assess their own results and, if necessary, seek expert advice.

### **Publication of your CIF in IUCr journals**

A basic structural check has been run on your CIF. These basic checks will be run on all CIFs submitted for publication in IUCr journals (*Acta Crystallographica*, *Journal of Applied Crystallography*, *Journal of Synchrotron Radiation*); however, if you intend to submit to *Acta Crystallographica Section C* or *E* or *IUCrData*, you should make sure that **full publication checks** are run on the final version of your CIF prior to submission.

### **Publication of your CIF in other journals**

Please refer to the *Notes for Authors* of the relevant journal for any special instructions relating to CIF submission.



```
R(reflections)= 0.0593( 714)      wR2(reflections)=
S = 1.034                        0.1591( 841)
Npar= 77
```

---

The following ALERTS were generated. Each ALERT has the format

**test-name\_ALERT\_alert-type\_alert-level.**

Click on the hyperlinks for more details of the test.

---

 **Alert level A**

|                                                                    |             |
|--------------------------------------------------------------------|-------------|
| PLAT051_ALERT_1_A Mu(calc) and Mu(CIF) Ratio Differs from 1.0 by . | 57.12 %     |
| PLAT660_ALERT_1_A No Valid _diffrn_radiation_type Value Reported . | Please Do ! |

---

 **Alert level B**

|                                                                  |            |
|------------------------------------------------------------------|------------|
| PLAT201_ALERT_2_B Isotropic non-H Atoms in Main Residue(s) ..... | 10 Report  |
| N1          N2          C1          C2          C3               | etc.       |
| PLAT342_ALERT_3_B Low Bond Precision on C-C Bonds .....          | 0.031 Ang. |

---

 **Alert level C**

|                                                                  |           |
|------------------------------------------------------------------|-----------|
| PLAT241_ALERT_2_C High 'MainMol' Ueq as Compared to Neighbors of | Cu2 Check |
|------------------------------------------------------------------|-----------|

---

 **Alert level G**

|                                                                    |               |
|--------------------------------------------------------------------|---------------|
| PLAT004_ALERT_5_G Polymeric Structure Found with Maximum Dimension | 2 Info        |
| PLAT012_ALERT_1_G No _shelx_res_checksum Found in CIF .....        | Please Check  |
| PLAT019_ALERT_1_G _diffrn_measured_fraction_theta_full/*_max < 1.0 | 0.993 Report  |
| PLAT072_ALERT_2_G SHELXL First Parameter in WGHT Unusually Large   | 0.11 Report   |
| PLAT092_ALERT_4_G Check: Wavelength Given is not Cu,Ga,Mo,Ag,In Ka | 0.31850 Ang.  |
| PLAT232_ALERT_2_G Hirshfeld Test Diff (M-X) I1 --Cu2_c             | 7.0 s.u.      |
| PLAT333_ALERT_2_G Large Aver C6-Ring C-C Dist C1 -C6               | 1.43 Ang.     |
| PLAT941_ALERT_3_G Average HKL Measurement Multiplicity .....       | 2.0 Low       |
| PLAT952_ALERT_5_G Calculated (ThMax) and CIF-Reported Lmax Differ. | 9 Units       |
| PLAT984_ALERT_1_G The C-f' = 0.0033 Deviates from the B&C-Value    | -0.0008 Check |
| PLAT984_ALERT_1_G The Cu-f' = 0.3201 Deviates from the B&C-Value   | 0.1660 Check  |
| PLAT984_ALERT_1_G The I-f' = -0.4742 Deviates from the B&C-Value   | -0.8576 Check |
| PLAT984_ALERT_1_G The N-f' = 0.0061 Deviates from the B&C-Value    | -0.0009 Check |
| PLAT985_ALERT_1_G The C-f" = 0.0016 Deviates from the B&C-Value    | 0.0003 Check  |
| PLAT985_ALERT_1_G The Cu-f" = 1.2651 Deviates from the B&C-Value   | 0.2861 Check  |
| PLAT985_ALERT_1_G The I-f" = 1.8119 Deviates from the B&C-Value    | 2.7116 Check  |
| PLAT985_ALERT_1_G The N-f" = 0.0033 Deviates from the B&C-Value    | 0.0005 Check  |

---

2 **ALERT level A** = Most likely a serious problem - resolve or explain

2 **ALERT level B** = A potentially serious problem, consider carefully

1 **ALERT level C** = Check. Ensure it is not caused by an omission or oversight

17 **ALERT level G** = General information/check it is not something unexpected

12 ALERT type 1 CIF construction/syntax error, inconsistent or missing data

5 ALERT type 2 Indicator that the structure model may be wrong or deficient

2 ALERT type 3 Indicator that the structure quality may be low

1 ALERT type 4 Improvement, methodology, query or suggestion

2 ALERT type 5 Informative message, check

---

It is advisable to attempt to resolve as many as possible of the alerts in all categories. Often the minor alerts point to easily fixed oversights, errors and omissions in your CIF or refinement strategy, so attention to these fine details can be worthwhile. In order to resolve some of the more serious problems it may be necessary to carry out additional measurements or structure refinements. However, the purpose of your study may justify the reported deviations and the more serious of these should normally be commented upon in the discussion or experimental section of a paper or in the "special\_details" fields of the CIF. checkCIF was carefully designed to identify outliers and unusual parameters, but every test has its limitations and alerts that are not important in a particular case may appear. Conversely, the absence of alerts does not guarantee there are no aspects of the results needing attention. It is up to the individual to critically assess their own results and, if necessary, seek expert advice.

### **Publication of your CIF in IUCr journals**

A basic structural check has been run on your CIF. These basic checks will be run on all CIFs submitted for publication in IUCr journals (*Acta Crystallographica*, *Journal of Applied Crystallography*, *Journal of Synchrotron Radiation*); however, if you intend to submit to *Acta Crystallographica Section C* or *E* or *IUCrData*, you should make sure that **full publication checks** are run on the final version of your CIF prior to submission.

### **Publication of your CIF in other journals**

Please refer to the *Notes for Authors* of the relevant journal for any special instructions relating to CIF submission.



```
R(reflections)= 0.0497( 695)      wR2(reflections)=
S = 1.087                        0.1386( 826)
Npar= 77
```

---

The following ALERTS were generated. Each ALERT has the format

**test-name\_ALERT\_alert-type\_alert-level.**

Click on the hyperlinks for more details of the test.

---

 **Alert level A**

|                   |                                                  |             |
|-------------------|--------------------------------------------------|-------------|
| PLAT051_ALERT_1_A | Mu(calc) and Mu(CIF) Ratio Differs from 1.0 by . | 57.12 %     |
| PLAT660_ALERT_1_A | No Valid _diffrn_radiation_type Value Reported . | Please Do ! |

---

 **Alert level B**

|                   |                                                            |              |
|-------------------|------------------------------------------------------------|--------------|
| PLAT201_ALERT_2_B | Isotropic non-H Atoms in Main Residue(s) .....             | 10 Report    |
|                   | N1            N2            C1            C2            C3 | etc.         |
| PLAT342_ALERT_3_B | Low Bond Precision on C-C Bonds .....                      | 0.03029 Ang. |

---

 **Alert level C**

|                   |                                                |           |
|-------------------|------------------------------------------------|-----------|
| PLAT241_ALERT_2_C | High 'MainMol' Ueq as Compared to Neighbors of | Cu1 Check |
|-------------------|------------------------------------------------|-----------|

---

 **Alert level G**

|                   |                                                  |               |
|-------------------|--------------------------------------------------|---------------|
| PLAT004_ALERT_5_G | Polymeric Structure Found with Maximum Dimension | 2 Info        |
| PLAT012_ALERT_1_G | No _shelx_res_checksum Found in CIF .....        | Please Check  |
| PLAT019_ALERT_1_G | _diffrn_measured_fraction_theta_full/*_max < 1.0 | 0.988 Report  |
| PLAT092_ALERT_4_G | Check: Wavelength Given is not Cu,Ga,Mo,Ag,In Ka | 0.31850 Ang.  |
| PLAT232_ALERT_2_G | Hirshfeld Test Diff (M-X) I2 --Cu1_f .           | 6.2 s.u.      |
| PLAT941_ALERT_3_G | Average HKL Measurement Multiplicity .....       | 1.9 Low       |
| PLAT952_ALERT_5_G | Calculated (ThMax) and CIF-Reported Lmax Differ. | 9 Units       |
| PLAT984_ALERT_1_G | The C-f' = 0.0033 Deviates from the B&C-Value    | -0.0008 Check |
| PLAT984_ALERT_1_G | The Cu-f' = 0.3201 Deviates from the B&C-Value   | 0.1660 Check  |
| PLAT984_ALERT_1_G | The I-f' = -0.4742 Deviates from the B&C-Value   | -0.8576 Check |
| PLAT984_ALERT_1_G | The N-f' = 0.0061 Deviates from the B&C-Value    | -0.0009 Check |
| PLAT985_ALERT_1_G | The C-f" = 0.0016 Deviates from the B&C-Value    | 0.0003 Check  |
| PLAT985_ALERT_1_G | The Cu-f" = 1.2651 Deviates from the B&C-Value   | 0.2861 Check  |
| PLAT985_ALERT_1_G | The I-f" = 1.8119 Deviates from the B&C-Value    | 2.7116 Check  |
| PLAT985_ALERT_1_G | The N-f" = 0.0033 Deviates from the B&C-Value    | 0.0005 Check  |

---

2 **ALERT level A** = Most likely a serious problem - resolve or explain

2 **ALERT level B** = A potentially serious problem, consider carefully

1 **ALERT level C** = Check. Ensure it is not caused by an omission or oversight

15 **ALERT level G** = General information/check it is not something unexpected

12 ALERT type 1 CIF construction/syntax error, inconsistent or missing data

3 ALERT type 2 Indicator that the structure model may be wrong or deficient

2 ALERT type 3 Indicator that the structure quality may be low

1 ALERT type 4 Improvement, methodology, query or suggestion

2 ALERT type 5 Informative message, check

---

It is advisable to attempt to resolve as many as possible of the alerts in all categories. Often the minor alerts point to easily fixed oversights, errors and omissions in your CIF or refinement strategy, so attention to these fine details can be worthwhile. In order to resolve some of the more serious problems it may be necessary to carry out additional measurements or structure refinements. However, the purpose of your study may justify the reported deviations and the more serious of these should normally be commented upon in the discussion or experimental section of a paper or in the "special\_details" fields of the CIF. checkCIF was carefully designed to identify outliers and unusual parameters, but every test has its limitations and alerts that are not important in a particular case may appear. Conversely, the absence of alerts does not guarantee there are no aspects of the results needing attention. It is up to the individual to critically assess their own results and, if necessary, seek expert advice.

### **Publication of your CIF in IUCr journals**

A basic structural check has been run on your CIF. These basic checks will be run on all CIFs submitted for publication in IUCr journals (*Acta Crystallographica*, *Journal of Applied Crystallography*, *Journal of Synchrotron Radiation*); however, if you intend to submit to *Acta Crystallographica Section C* or *E* or *IUCrData*, you should make sure that **full publication checks** are run on the final version of your CIF prior to submission.

### **Publication of your CIF in other journals**

Please refer to the *Notes for Authors* of the relevant journal for any special instructions relating to CIF submission.



```
R(reflections)= 0.0703( 686)      wR2(reflections)=
S = 1.043                        0.1985( 811)
Npar= 72
```

---

The following ALERTS were generated. Each ALERT has the format

**test-name\_ALERT\_alert-type\_alert-level.**

Click on the hyperlinks for more details of the test.

---

### Alert level A

|                   |                                                  |             |    |    |      |
|-------------------|--------------------------------------------------|-------------|----|----|------|
| PLAT051_ALERT_1_A | Mu(calc) and Mu(CIF) Ratio Differs from 1.0 by . | 57.11 %     |    |    |      |
| PLAT201_ALERT_2_A | Isotropic non-H Atoms in Main Residue(s) .....   | 11 Report   |    |    |      |
| I1                | N1                                               | N2          | C1 | C2 | etc. |
| PLAT660_ALERT_1_A | No Valid _diffrn_radiation_type Value Reported . | Please Do ! |    |    |      |

---

### Alert level B

|                   |                                       |              |
|-------------------|---------------------------------------|--------------|
| PLAT342_ALERT_3_B | Low Bond Precision on C-C Bonds ..... | 0.03557 Ang. |
|-------------------|---------------------------------------|--------------|

---

### Alert level C

|                   |                                                |          |
|-------------------|------------------------------------------------|----------|
| PLAT241_ALERT_2_C | High 'MainMol' Ueq as Compared to Neighbors of | C5 Check |
|-------------------|------------------------------------------------|----------|

---

### Alert level G

|                   |                                                  |               |
|-------------------|--------------------------------------------------|---------------|
| PLAT004_ALERT_5_G | Polymeric Structure Found with Maximum Dimension | 2 Info        |
| PLAT012_ALERT_1_G | No _shelx_res_checksum Found in CIF .....        | Please Check  |
| PLAT072_ALERT_2_G | SHELXL First Parameter in WGHT Unusually Large   | 0.15 Report   |
| PLAT092_ALERT_4_G | Check: Wavelength Given is not Cu,Ga,Mo,Ag,In Ka | 0.31850 Ang.  |
| PLAT112_ALERT_2_G | ADDSYM Detects New (Pseudo) Symm. Elem           | sub 85 %Fit   |
| PLAT432_ALERT_2_G | Short Inter X...Y Contact I1 ..C8 .              | 3.38 Ang.     |
|                   | -x,1-y,-z =                                      | 3_565 Check   |
| PLAT432_ALERT_2_G | Short Inter X...Y Contact I2 ..C4 .              | 3.45 Ang.     |
|                   | 1/2+x,3/2-y,-1/2+z =                             | 4_675 Check   |
| PLAT941_ALERT_3_G | Average HKL Measurement Multiplicity .....       | 2.0 Low       |
| PLAT952_ALERT_5_G | Calculated (ThMax) and CIF-Reported Lmax Differ. | 9 Units       |
| PLAT984_ALERT_1_G | The C-f' = 0.0033 Deviates from the B&C-Value    | -0.0008 Check |
| PLAT984_ALERT_1_G | The Cu-f' = 0.3201 Deviates from the B&C-Value   | 0.1660 Check  |
| PLAT984_ALERT_1_G | The I-f' = -0.4742 Deviates from the B&C-Value   | -0.8576 Check |
| PLAT984_ALERT_1_G | The N-f' = 0.0061 Deviates from the B&C-Value    | -0.0009 Check |
| PLAT985_ALERT_1_G | The C-f" = 0.0016 Deviates from the B&C-Value    | 0.0003 Check  |
| PLAT985_ALERT_1_G | The Cu-f" = 1.2651 Deviates from the B&C-Value   | 0.2861 Check  |
| PLAT985_ALERT_1_G | The I-f" = 1.8119 Deviates from the B&C-Value    | 2.7116 Check  |
| PLAT985_ALERT_1_G | The N-f" = 0.0033 Deviates from the B&C-Value    | 0.0005 Check  |

---

3 **ALERT level A** = Most likely a serious problem - resolve or explain

1 **ALERT level B** = A potentially serious problem, consider carefully

1 **ALERT level C** = Check. Ensure it is not caused by an omission or oversight

17 **ALERT level G** = General information/check it is not something unexpected

11 ALERT type 1 CIF construction/syntax error, inconsistent or missing data

6 ALERT type 2 Indicator that the structure model may be wrong or deficient

2 ALERT type 3 Indicator that the structure quality may be low

1 ALERT type 4 Improvement, methodology, query or suggestion

2 ALERT type 5 Informative message, check

---

It is advisable to attempt to resolve as many as possible of the alerts in all categories. Often the minor alerts point to easily fixed oversights, errors and omissions in your CIF or refinement strategy, so attention to these fine details can be worthwhile. In order to resolve some of the more serious problems it may be necessary to carry out additional measurements or structure refinements. However, the purpose of your study may justify the reported deviations and the more serious of these should normally be commented upon in the discussion or experimental section of a paper or in the "special\_details" fields of the CIF. checkCIF was carefully designed to identify outliers and unusual parameters, but every test has its limitations and alerts that are not important in a particular case may appear. Conversely, the absence of alerts does not guarantee there are no aspects of the results needing attention. It is up to the individual to critically assess their own results and, if necessary, seek expert advice.

### **Publication of your CIF in IUCr journals**

A basic structural check has been run on your CIF. These basic checks will be run on all CIFs submitted for publication in IUCr journals (*Acta Crystallographica*, *Journal of Applied Crystallography*, *Journal of Synchrotron Radiation*); however, if you intend to submit to *Acta Crystallographica Section C* or *E* or *IUCrData*, you should make sure that **full publication checks** are run on the final version of your CIF prior to submission.

### **Publication of your CIF in other journals**

Please refer to the *Notes for Authors* of the relevant journal for any special instructions relating to CIF submission.



```
R(reflections)= 0.0584( 669)      wR2(reflections)=
S = 1.078                        0.1764( 811)
Npar= 77
```

---

The following ALERTS were generated. Each ALERT has the format

**test-name\_ALERT\_alert-type\_alert-level.**

Click on the hyperlinks for more details of the test.

---

### Alert level A

|                   |                                     |                           |       |             |
|-------------------|-------------------------------------|---------------------------|-------|-------------|
| PLAT029_ALERT_3_A | _diffn_measured_fraction_theta_full | value Low                 | 0.412 | Why?        |
| PLAT051_ALERT_1_A | Mu(calc) and Mu(CIF)                | Ratio Differs from 1.0 by | 57.12 | %           |
| PLAT660_ALERT_1_A | No Valid _diffn_radiation_type      | Value Reported            |       | Please Do ! |

---

### Alert level B

|                   |                                          |           |       |         |      |      |
|-------------------|------------------------------------------|-----------|-------|---------|------|------|
| PLAT201_ALERT_2_B | Isotropic non-H Atoms in Main Residue(s) | .....     | 10    | Report  |      |      |
|                   | N1                                       | N2        | C1    | C2      | C3   | etc. |
| PLAT342_ALERT_3_B | Low Bond Precision on                    | C-C Bonds | ..... | 0.03571 | Ang. |      |

---

### Alert level G

|                   |                                                  |                      |                             |         |       |
|-------------------|--------------------------------------------------|----------------------|-----------------------------|---------|-------|
| PLAT004_ALERT_5_G | Polymeric Structure Found with Maximum Dimension | 2                    | Info                        |         |       |
| PLAT012_ALERT_1_G | No _shelx_res_checksum Found in CIF              | .....                | Please Check                |         |       |
| PLAT072_ALERT_2_G | SHELXL First Parameter in WGHT                   | Unusually Large      | 0.13                        | Report  |       |
| PLAT092_ALERT_4_G | Check: Wavelength Given is not Cu,Ga,Mo,Ag,In    | Ka                   | 0.31850                     | Ang.    |       |
| PLAT112_ALERT_2_G | ADDSYM Detects New (Pseudo) Symm. Elem           | sub                  | 85                          | %Fit    |       |
| PLAT333_ALERT_2_G | Large Aver C6-Ring C-C Dist C1                   | -C6                  | 1.43                        | Ang.    |       |
| PLAT335_ALERT_2_G | Check Large C6 Ring C-C Range C1                 | -C6                  | 0.18                        | Ang.    |       |
| PLAT432_ALERT_2_G | Short Inter X...Y Contact I1                     | ..C8                 | 3.38                        | Ang.    |       |
|                   |                                                  | -x,1-y,-z =          | 3_565                       | Check   |       |
| PLAT432_ALERT_2_G | Short Inter X...Y Contact I2                     | ..C4                 | 3.48                        | Ang.    |       |
|                   |                                                  | 1/2+x,3/2-y,-1/2+z = | 4_675                       | Check   |       |
| PLAT941_ALERT_3_G | Average HKL Measurement Multiplicity             | .....                | 2.0                         | Low     |       |
| PLAT952_ALERT_5_G | Calculated (ThMax) and CIF-Reported Lmax Differ. |                      | 9                           | Units   |       |
| PLAT984_ALERT_1_G | The C-f' =                                       | 0.0033               | Deviates from the B&C-Value | -0.0008 | Check |
| PLAT984_ALERT_1_G | The Cu-f' =                                      | 0.3201               | Deviates from the B&C-Value | 0.1660  | Check |
| PLAT984_ALERT_1_G | The I-f' =                                       | -0.4742              | Deviates from the B&C-Value | -0.8576 | Check |
| PLAT984_ALERT_1_G | The N-f' =                                       | 0.0061               | Deviates from the B&C-Value | -0.0009 | Check |
| PLAT985_ALERT_1_G | The C-f" =                                       | 0.0016               | Deviates from the B&C-Value | 0.0003  | Check |
| PLAT985_ALERT_1_G | The Cu-f" =                                      | 1.2651               | Deviates from the B&C-Value | 0.2861  | Check |
| PLAT985_ALERT_1_G | The I-f" =                                       | 1.8119               | Deviates from the B&C-Value | 2.7116  | Check |
| PLAT985_ALERT_1_G | The N-f" =                                       | 0.0033               | Deviates from the B&C-Value | 0.0005  | Check |

---

3 **ALERT level A** = Most likely a serious problem - resolve or explain

2 **ALERT level B** = A potentially serious problem, consider carefully

0 **ALERT level C** = Check. Ensure it is not caused by an omission or oversight

19 **ALERT level G** = General information/check it is not something unexpected

11 ALERT type 1 CIF construction/syntax error, inconsistent or missing data

7 ALERT type 2 Indicator that the structure model may be wrong or deficient

3 ALERT type 3 Indicator that the structure quality may be low

1 ALERT type 4 Improvement, methodology, query or suggestion

2 ALERT type 5 Informative message, check

---

It is advisable to attempt to resolve as many as possible of the alerts in all categories. Often the minor alerts point to easily fixed oversights, errors and omissions in your CIF or refinement strategy, so attention to these fine details can be worthwhile. In order to resolve some of the more serious problems it may be necessary to carry out additional measurements or structure refinements. However, the purpose of your study may justify the reported deviations and the more serious of these should normally be commented upon in the discussion or experimental section of a paper or in the "special\_details" fields of the CIF. checkCIF was carefully designed to identify outliers and unusual parameters, but every test has its limitations and alerts that are not important in a particular case may appear. Conversely, the absence of alerts does not guarantee there are no aspects of the results needing attention. It is up to the individual to critically assess their own results and, if necessary, seek expert advice.

### **Publication of your CIF in IUCr journals**

A basic structural check has been run on your CIF. These basic checks will be run on all CIFs submitted for publication in IUCr journals (*Acta Crystallographica*, *Journal of Applied Crystallography*, *Journal of Synchrotron Radiation*); however, if you intend to submit to *Acta Crystallographica Section C* or *E* or *IUCrData*, you should make sure that **full publication checks** are run on the final version of your CIF prior to submission.

### **Publication of your CIF in other journals**

Please refer to the *Notes for Authors* of the relevant journal for any special instructions relating to CIF submission.





---

The following ALERTS were generated. Each ALERT has the format

**test-name\_ALERT\_alert-type\_alert-level.**

Click on the hyperlinks for more details of the test.

---

 **Alert level A**

|                   |                                                  |             |
|-------------------|--------------------------------------------------|-------------|
| PLAT051_ALERT_1_A | Mu(calc) and Mu(CIF) Ratio Differs from 1.0 by . | 57.12 %     |
| PLAT660_ALERT_1_A | No Valid _diffrn_radiation_type Value Reported . | Please Do ! |

---

 **Alert level B**

|                   |                                                            |              |
|-------------------|------------------------------------------------------------|--------------|
| PLAT201_ALERT_2_B | Isotropic non-H Atoms in Main Residue(s) .....             | 10 Report    |
|                   | N1            N2            C1            C2            C3 | etc.         |
| PLAT342_ALERT_3_B | Low Bond Precision on C-C Bonds .....                      | 0.03229 Ang. |

---

 **Alert level C**

|                   |                                                |           |
|-------------------|------------------------------------------------|-----------|
| PLAT241_ALERT_2_C | High 'MainMol' Ueq as Compared to Neighbors of | Cu2 Check |
|-------------------|------------------------------------------------|-----------|

---

 **Alert level G**

|                   |                                                  |               |
|-------------------|--------------------------------------------------|---------------|
| PLAT004_ALERT_5_G | Polymeric Structure Found with Maximum Dimension | 2 Info        |
| PLAT012_ALERT_1_G | No _shelx_res_checksum Found in CIF .....        | Please Check  |
| PLAT019_ALERT_1_G | _diffrn_measured_fraction_theta_full/*_max < 1.0 | 0.993 Report  |
| PLAT092_ALERT_4_G | Check: Wavelength Given is not Cu,Ga,Mo,Ag,In Ka | 0.31850 Ang.  |
| PLAT112_ALERT_2_G | ADDSYM Detects New (Pseudo) Symm. Elem sub       | 85 %Fit       |
| PLAT432_ALERT_2_G | Short Inter X...Y Contact I1 ..C8 .              | 3.32 Ang.     |
|                   | -x,1-y,-z =                                      | 3_565 Check   |
| PLAT432_ALERT_2_G | Short Inter X...Y Contact I2 ..C4 .              | 3.44 Ang.     |
|                   | 1/2+x,3/2-y,-1/2+z =                             | 4_675 Check   |
| PLAT941_ALERT_3_G | Average HKL Measurement Multiplicity .....       | 1.9 Low       |
| PLAT952_ALERT_5_G | Calculated (ThMax) and CIF-Reported Lmax Differ. | 8 Units       |
| PLAT984_ALERT_1_G | The C-f' = 0.0033 Deviates from the B&C-Value    | -0.0008 Check |
| PLAT984_ALERT_1_G | The Cu-f' = 0.3201 Deviates from the B&C-Value   | 0.1660 Check  |
| PLAT984_ALERT_1_G | The I-f' = -0.4742 Deviates from the B&C-Value   | -0.8576 Check |
| PLAT984_ALERT_1_G | The N-f' = 0.0061 Deviates from the B&C-Value    | -0.0009 Check |
| PLAT985_ALERT_1_G | The C-f" = 0.0016 Deviates from the B&C-Value    | 0.0003 Check  |
| PLAT985_ALERT_1_G | The Cu-f" = 1.2651 Deviates from the B&C-Value   | 0.2861 Check  |
| PLAT985_ALERT_1_G | The I-f" = 1.8119 Deviates from the B&C-Value    | 2.7116 Check  |
| PLAT985_ALERT_1_G | The N-f" = 0.0033 Deviates from the B&C-Value    | 0.0005 Check  |

---

2 **ALERT level A** = Most likely a serious problem - resolve or explain

2 **ALERT level B** = A potentially serious problem, consider carefully

1 **ALERT level C** = Check. Ensure it is not caused by an omission or oversight

17 **ALERT level G** = General information/check it is not something unexpected

12 ALERT type 1 CIF construction/syntax error, inconsistent or missing data

5 ALERT type 2 Indicator that the structure model may be wrong or deficient

2 ALERT type 3 Indicator that the structure quality may be low

1 ALERT type 4 Improvement, methodology, query or suggestion

2 ALERT type 5 Informative message, check

---

It is advisable to attempt to resolve as many as possible of the alerts in all categories. Often the minor alerts point to easily fixed oversights, errors and omissions in your CIF or refinement strategy, so attention to these fine details can be worthwhile. In order to resolve some of the more serious problems it may be necessary to carry out additional measurements or structure refinements. However, the purpose of your study may justify the reported deviations and the more serious of these should normally be commented upon in the discussion or experimental section of a paper or in the "special\_details" fields of the CIF. checkCIF was carefully designed to identify outliers and unusual parameters, but every test has its limitations and alerts that are not important in a particular case may appear. Conversely, the absence of alerts does not guarantee there are no aspects of the results needing attention. It is up to the individual to critically assess their own results and, if necessary, seek expert advice.

### **Publication of your CIF in IUCr journals**

A basic structural check has been run on your CIF. These basic checks will be run on all CIFs submitted for publication in IUCr journals (*Acta Crystallographica*, *Journal of Applied Crystallography*, *Journal of Synchrotron Radiation*); however, if you intend to submit to *Acta Crystallographica Section C* or *E* or *IUCrData*, you should make sure that **full publication checks** are run on the final version of your CIF prior to submission.

### **Publication of your CIF in other journals**

Please refer to the *Notes for Authors* of the relevant journal for any special instructions relating to CIF submission.



## checkCIF/PLATON report

You have not supplied any structure factors. As a result the full set of tests cannot be run.

THIS REPORT IS FOR GUIDANCE ONLY. IF USED AS PART OF A REVIEW PROCEDURE FOR PUBLICATION, IT SHOULD NOT REPLACE THE EXPERTISE OF AN EXPERIENCED CRYSTALLOGRAPHIC REFEREE.

No syntax errors found.      CIF dictionary      Interpreting this report

### Datablock: CuI-Quin\_325GPa

---

Bond precision:      C-C = 0.0629 Å      Wavelength=0.31850

Cell:                      a=4.3090(2)                      b=17.0807(9)                      c=12.645(2)  
                              alpha=88.916(11)                      beta=95.228(11)                      gamma=92.637(4)  
Temperature:      298 K

|                        | Calculated        | Reported               |
|------------------------|-------------------|------------------------|
| Volume                 | 925.73(16)        | 925.71(17)             |
| Space group            | P -1              | P -1                   |
| Hall group             | -P 1              | -P 1                   |
| Moiety formula         | C16 H12 Cu4 I4 N4 | 0.5(C16 H12 Cu4 I4 N4) |
| Sum formula            | C16 H12 Cu4 I4 N4 | C8 H6 Cu2 I2 N2        |
| Mr                     | 1022.10           | 511.03                 |
| Dx, g cm <sup>-3</sup> | 3.667             | 3.667                  |
| Z                      | 2                 | 4                      |
| Mu (mm <sup>-1</sup> ) | 4.809             | 11.215                 |
| F000                   | 928.0             | 928.0                  |
| F000'                  | 922.57            |                        |
| h, k, lmax             | 5, 21, 16         | 5, 21, 7               |
| Nref                   | 4106              | 1242                   |
| Tmin, Tmax             | 0.692, 0.855      | 0.057, 1.000           |
| Tmin'                  | 0.420             |                        |

Correction method= # Reported T Limits: Tmin=0.057 Tmax=1.000  
AbsCorr = MULTI-SCAN

Data completeness= 0.302      Theta(max)= 11.779

|                              |                   |
|------------------------------|-------------------|
| R(reflections)= 0.0976( 796) | wR2(reflections)= |
| S = 1.057                    | 0.3065( 1242)     |
| Npar= 99                     |                   |

---

The following ALERTS were generated. Each ALERT has the format

**test-name\_ALERT\_alert-type\_alert-level.**

Click on the hyperlinks for more details of the test.

---

#### Alert level A

|                   |                                                  |             |
|-------------------|--------------------------------------------------|-------------|
| PLAT051_ALERT_1_A | Mu(calc) and Mu(CIF) Ratio Differs from 1.0 by . | 57.12 %     |
| PLAT201_ALERT_2_A | Isotropic non-H Atoms in Main Residue(s) .....   | 20 Report   |
|                   | N1 N2 N3 N4 C1                                   | etc.        |
| PLAT660_ALERT_1_A | No Valid _diffn_radiation_type Value Reported .  | Please Do ! |

---

#### Alert level B

|                   |                                                  |              |
|-------------------|--------------------------------------------------|--------------|
| PLAT250_ALERT_2_B | Large U3/U1 Ratio for Average U(i,j) Tensor .... | 5.3 Note     |
| PLAT342_ALERT_3_B | Low Bond Precision on C-C Bonds .....            | 0.06286 Ang. |

---

#### Alert level C

|                   |                                                |             |
|-------------------|------------------------------------------------|-------------|
| PLAT084_ALERT_3_C | High wR2 Value (i.e. > 0.25) .....             | 0.31 Report |
| PLAT112_ALERT_2_C | ADDSYM Detects New (Pseudo) Symm. Elem 636     | 85 %Fit     |
| PLAT155_ALERT_4_C | The Triclinic Unitcell is NOT Reduced .....    | Please Do ! |
| PLAT234_ALERT_4_C | Large Hirshfeld Difference I2 --Cu3 .          | 0.17 Ang.   |
| PLAT234_ALERT_4_C | Large Hirshfeld Difference I4 --Cu2 .          | 0.17 Ang.   |
| PLAT241_ALERT_2_C | High 'MainMol' Ueq as Compared to Neighbors of | Cu1 Check   |
| PLAT241_ALERT_2_C | High 'MainMol' Ueq as Compared to Neighbors of | Cu2 Check   |
| PLAT241_ALERT_2_C | High 'MainMol' Ueq as Compared to Neighbors of | Cu3 Check   |

---

#### Alert level G

|                   |                                                  |              |
|-------------------|--------------------------------------------------|--------------|
| PLAT004_ALERT_5_G | Polymeric Structure Found with Maximum Dimension | 2 Info       |
| PLAT012_ALERT_1_G | No _shelx_res_checksum Found in CIF .....        | Please Check |
| PLAT019_ALERT_1_G | _diffn_measured_fraction_theta_full/*_max < 1.0  | 0.974 Report |
| PLAT045_ALERT_1_G | Calculated and Reported Z Differ by a Factor ... | 0.500 Check  |
| PLAT072_ALERT_2_G | SHELXL First Parameter in WGHT Unusually Large   | 0.20 Report  |
| PLAT092_ALERT_4_G | Check: Wavelength Given is not Cu,Ga,Mo,Ag,In Ka | 0.31850 Ang. |
| PLAT171_ALERT_4_G | The CIF-Embedded .res File Contains EADP Records | 4 Report     |
| PLAT174_ALERT_4_G | The CIF-Embedded .res File Contains FLAT Records | 4 Report     |
| PLAT333_ALERT_2_G | Large Aver C6-Ring C-C Dist C1 -C6 .             | 1.42 Ang.    |
| PLAT335_ALERT_2_G | Check Large C6 Ring C-C Range C1 -C6             | 0.21 Ang.    |
| PLAT335_ALERT_2_G | Check Large C6 Ring C-C Range C9 -C14            | 0.21 Ang.    |
| PLAT432_ALERT_2_G | Short Inter X...Y Contact I1 ..C11 .             | 3.40 Ang.    |
|                   | 1-x,-y,-z =                                      | 2_655 Check  |
| PLAT432_ALERT_2_G | Short Inter X...Y Contact I2 ..C7 .              | 3.28 Ang.    |
|                   | 1-x,-y,-z =                                      | 2_655 Check  |
| PLAT432_ALERT_2_G | Short Inter X...Y Contact I2 ..C8 .              | 3.48 Ang.    |
|                   | 1-x,-y,-z =                                      | 2_655 Check  |
| PLAT432_ALERT_2_G | Short Inter X...Y Contact I3 ..C15 .             | 3.19 Ang.    |
|                   | 2-x,-y,1-z =                                     | 2_756 Check  |
| PLAT432_ALERT_2_G | Short Inter X...Y Contact I3 ..C16 .             | 3.48 Ang.    |
|                   | 2-x,-y,1-z =                                     | 2_756 Check  |
| PLAT432_ALERT_2_G | Short Inter X...Y Contact I4 ..C3 .              | 3.28 Ang.    |
|                   | 2-x,-y,1-z =                                     | 2_756 Check  |
| PLAT432_ALERT_2_G | Short Inter X...Y Contact I4 ..C3 .              | 3.46 Ang.    |
|                   | 1-x,-y,1-z =                                     | 2_656 Check  |
| PLAT860_ALERT_3_G | Number of Least-Squares Restraints .....         | 12 Note      |

|                   |                                                  |         |       |
|-------------------|--------------------------------------------------|---------|-------|
| PLAT941_ALERT_3_G | Average HKL Measurement Multiplicity .....       | 1.3     | Low   |
| PLAT952_ALERT_5_G | Calculated (ThMax) and CIF-Reported Lmax Differ. | 9       | Units |
| PLAT984_ALERT_1_G | The C-f' = 0.0033 Deviates from the B&C-Value    | -0.0008 | Check |
| PLAT984_ALERT_1_G | The Cu-f' = 0.3201 Deviates from the B&C-Value   | 0.1660  | Check |
| PLAT984_ALERT_1_G | The I-f' = -0.4742 Deviates from the B&C-Value   | -0.8576 | Check |
| PLAT984_ALERT_1_G | The N-f' = 0.0061 Deviates from the B&C-Value    | -0.0009 | Check |
| PLAT985_ALERT_1_G | The C-f" = 0.0016 Deviates from the B&C-Value    | 0.0003  | Check |
| PLAT985_ALERT_1_G | The Cu-f" = 1.2651 Deviates from the B&C-Value   | 0.2861  | Check |
| PLAT985_ALERT_1_G | The I-f" = 1.8119 Deviates from the B&C-Value    | 2.7116  | Check |
| PLAT985_ALERT_1_G | The N-f" = 0.0033 Deviates from the B&C-Value    | 0.0005  | Check |

---

3 **ALERT level A** = Most likely a serious problem - resolve or explain  
 2 **ALERT level B** = A potentially serious problem, consider carefully  
 8 **ALERT level C** = Check. Ensure it is not caused by an omission or oversight  
 29 **ALERT level G** = General information/check it is not something unexpected

13 ALERT type 1 CIF construction/syntax error, inconsistent or missing data  
 17 ALERT type 2 Indicator that the structure model may be wrong or deficient  
 4 ALERT type 3 Indicator that the structure quality may be low  
 6 ALERT type 4 Improvement, methodology, query or suggestion  
 2 ALERT type 5 Informative message, check

---

It is advisable to attempt to resolve as many as possible of the alerts in all categories. Often the minor alerts point to easily fixed oversights, errors and omissions in your CIF or refinement strategy, so attention to these fine details can be worthwhile. In order to resolve some of the more serious problems it may be necessary to carry out additional measurements or structure refinements. However, the purpose of your study may justify the reported deviations and the more serious of these should normally be commented upon in the discussion or experimental section of a paper or in the "special\_details" fields of the CIF. checkCIF was carefully designed to identify outliers and unusual parameters, but every test has its limitations and alerts that are not important in a particular case may appear. Conversely, the absence of alerts does not guarantee there are no aspects of the results needing attention. It is up to the individual to critically assess their own results and, if necessary, seek expert advice.

### Publication of your CIF in IUCr journals

A basic structural check has been run on your CIF. These basic checks will be run on all CIFs submitted for publication in IUCr journals (*Acta Crystallographica*, *Journal of Applied Crystallography*, *Journal of Synchrotron Radiation*); however, if you intend to submit to *Acta Crystallographica Section C* or *E* or *IUCrData*, you should make sure that **full publication checks** are run on the final version of your CIF prior to submission.

### Publication of your CIF in other journals

Please refer to the *Notes for Authors* of the relevant journal for any special instructions relating to CIF submission.

PLATON version of 28/11/2022; check.def file version of 28/11/2022

Datablock CuI-Quin\_325GPa - ellipsoid plot



## checkCIF/PLATON report

You have not supplied any structure factors. As a result the full set of tests cannot be run.

THIS REPORT IS FOR GUIDANCE ONLY. IF USED AS PART OF A REVIEW PROCEDURE FOR PUBLICATION, IT SHOULD NOT REPLACE THE EXPERTISE OF AN EXPERIENCED CRYSTALLOGRAPHIC REFEREE.

No syntax errors found.      CIF dictionary      Interpreting this report

### Datablock: CuI-Quin\_369GPa

---

Bond precision:      C-C = 0.0456 Å      Wavelength=0.31850

Cell:                      a=4.3058 (2)                      b=17.0097 (8)                      c=12.575 (2)  
                              alpha=87.899 (9)                      beta=95.572 (9)                      gamma=93.641 (4)  
Temperature:              298 K

|                        | Calculated        | Reported                |
|------------------------|-------------------|-------------------------|
| Volume                 | 914.36 (16)       | 914.40 (16)             |
| Space group            | P -1              | P -1                    |
| Hall group             | -P 1              | -P 1                    |
| Moiety formula         | C16 H12 Cu4 I4 N4 | 0.5 (C16 H12 Cu4 I4 N4) |
| Sum formula            | C16 H12 Cu4 I4 N4 | C8 H6 Cu2 I2 N2         |
| Mr                     | 1022.10           | 511.03                  |
| Dx, g cm <sup>-3</sup> | 3.712             | 3.712                   |
| Z                      | 2                 | 4                       |
| Mu (mm <sup>-1</sup> ) | 4.869             | 11.354                  |
| F000                   | 928.0             | 928.0                   |
| F000'                  | 922.57            |                         |
| h, k, lmax             | 5, 21, 16         | 5, 21, 7                |
| Nref                   | 4052              | 1232                    |
| Tmin, Tmax             | 0.688, 0.853      | 0.165, 1.000            |
| Tmin'                  | 0.416             |                         |

Correction method= # Reported T Limits: Tmin=0.165 Tmax=1.000  
AbsCorr = MULTI-SCAN

Data completeness= 0.304      Theta (max)= 11.778

|                               |                   |
|-------------------------------|-------------------|
| R(reflections)= 0.0815 ( 812) | wR2(reflections)= |
| S = 1.047                     | 0.2599 ( 1232)    |
| Npar= 75                      |                   |

---

The following ALERTS were generated. Each ALERT has the format

**test-name\_ALERT\_alert-type\_alert-level.**

Click on the hyperlinks for more details of the test.

---

#### Alert level A

|                   |                                                  |             |
|-------------------|--------------------------------------------------|-------------|
| PLAT051_ALERT_1_A | Mu(calc) and Mu(CIF) Ratio Differs from 1.0 by . | 57.11 %     |
| PLAT201_ALERT_2_A | Isotropic non-H Atoms in Main Residue(s) .....   | 20 Report   |
|                   | N1 N2 N3 N4 C1                                   | etc.        |
| PLAT660_ALERT_1_A | No Valid _diffrn_radiation_type Value Reported . | Please Do ! |

---

#### Alert level B

|                   |                                       |              |
|-------------------|---------------------------------------|--------------|
| PLAT342_ALERT_3_B | Low Bond Precision on C-C Bonds ..... | 0.04564 Ang. |
|-------------------|---------------------------------------|--------------|

---

#### Alert level C

|                   |                                             |             |
|-------------------|---------------------------------------------|-------------|
| PLAT084_ALERT_3_C | High wR2 Value (i.e. > 0.25) .....          | 0.26 Report |
| PLAT112_ALERT_2_C | ADDSYM Detects New (Pseudo) Symm. Elem 636  | 85 %Fit     |
| PLAT155_ALERT_4_C | The Triclinic Unitcell is NOT Reduced ..... | Please Do ! |
| PLAT368_ALERT_2_C | Short C(sp2)-C(sp2) Bond C12 - C13 .        | 1.17 Ang.   |

---

#### Alert level G

|                   |                                                  |               |
|-------------------|--------------------------------------------------|---------------|
| PLAT004_ALERT_5_G | Polymeric Structure Found with Maximum Dimension | 2 Info        |
| PLAT012_ALERT_1_G | No _shelx_res_checksum Found in CIF .....        | Please Check  |
| PLAT019_ALERT_1_G | _diffrn_measured_fraction_theta_full/*_max < 1.0 | 0.977 Report  |
| PLAT045_ALERT_1_G | Calculated and Reported Z Differ by a Factor ... | 0.500 Check   |
| PLAT072_ALERT_2_G | SHELXL First Parameter in WGHT Unusually Large   | 0.16 Report   |
| PLAT092_ALERT_4_G | Check: Wavelength Given is not Cu,Ga,Mo,Ag,In Ka | 0.31850 Ang.  |
| PLAT171_ALERT_4_G | The CIF-Embedded .res File Contains EADP Records | 4 Report      |
| PLAT335_ALERT_2_G | Check Large C6 Ring C-C Range C1 -C6             | 0.23 Ang.     |
| PLAT335_ALERT_2_G | Check Large C6 Ring C-C Range C9 -C14            | 0.26 Ang.     |
| PLAT432_ALERT_2_G | Short Inter X...Y Contact I1 ..C11 .             | 3.39 Ang.     |
|                   | 1-x,-y,-z =                                      | 2_655 Check   |
| PLAT432_ALERT_2_G | Short Inter X...Y Contact I2 ..C7 .              | 3.25 Ang.     |
|                   | 1-x,-y,-z =                                      | 2_655 Check   |
| PLAT432_ALERT_2_G | Short Inter X...Y Contact I2 ..C8 .              | 3.42 Ang.     |
|                   | 1-x,-y,-z =                                      | 2_655 Check   |
| PLAT432_ALERT_2_G | Short Inter X...Y Contact I3 ..C15 .             | 3.29 Ang.     |
|                   | 2-x,-y,1-z =                                     | 2_756 Check   |
| PLAT432_ALERT_2_G | Short Inter X...Y Contact I3 ..C16 .             | 3.41 Ang.     |
|                   | 2-x,-y,1-z =                                     | 2_756 Check   |
| PLAT432_ALERT_2_G | Short Inter X...Y Contact I4 ..C3 .              | 3.33 Ang.     |
|                   | 2-x,-y,1-z =                                     | 2_756 Check   |
| PLAT941_ALERT_3_G | Average HKL Measurement Multiplicity .....       | 1.3 Low       |
| PLAT952_ALERT_5_G | Calculated (ThMax) and CIF-Reported Lmax Differ. | 9 Units       |
| PLAT984_ALERT_1_G | The C-f' = 0.0033 Deviates from the B&C-Value    | -0.0008 Check |
| PLAT984_ALERT_1_G | The Cu-f' = 0.3201 Deviates from the B&C-Value   | 0.1660 Check  |
| PLAT984_ALERT_1_G | The I-f' = -0.4742 Deviates from the B&C-Value   | -0.8576 Check |
| PLAT984_ALERT_1_G | The N-f' = 0.0061 Deviates from the B&C-Value    | -0.0009 Check |
| PLAT985_ALERT_1_G | The C-f" = 0.0016 Deviates from the B&C-Value    | 0.0003 Check  |
| PLAT985_ALERT_1_G | The Cu-f" = 1.2651 Deviates from the B&C-Value   | 0.2861 Check  |
| PLAT985_ALERT_1_G | The I-f" = 1.8119 Deviates from the B&C-Value    | 2.7116 Check  |
| PLAT985_ALERT_1_G | The N-f" = 0.0033 Deviates from the B&C-Value    | 0.0005 Check  |

---

3 **ALERT level A** = Most likely a serious problem - resolve or explain  
1 **ALERT level B** = A potentially serious problem, consider carefully  
4 **ALERT level C** = Check. Ensure it is not caused by an omission or oversight  
25 **ALERT level G** = General information/check it is not something unexpected

13 ALERT type 1 CIF construction/syntax error, inconsistent or missing data  
12 ALERT type 2 Indicator that the structure model may be wrong or deficient  
3 ALERT type 3 Indicator that the structure quality may be low  
3 ALERT type 4 Improvement, methodology, query or suggestion  
2 ALERT type 5 Informative message, check

---

It is advisable to attempt to resolve as many as possible of the alerts in all categories. Often the minor alerts point to easily fixed oversights, errors and omissions in your CIF or refinement strategy, so attention to these fine details can be worthwhile. In order to resolve some of the more serious problems it may be necessary to carry out additional measurements or structure refinements. However, the purpose of your study may justify the reported deviations and the more serious of these should normally be commented upon in the discussion or experimental section of a paper or in the "special\_details" fields of the CIF. checkCIF was carefully designed to identify outliers and unusual parameters, but every test has its limitations and alerts that are not important in a particular case may appear. Conversely, the absence of alerts does not guarantee there are no aspects of the results needing attention. It is up to the individual to critically assess their own results and, if necessary, seek expert advice.

### **Publication of your CIF in IUCr journals**

A basic structural check has been run on your CIF. These basic checks will be run on all CIFs submitted for publication in IUCr journals (*Acta Crystallographica*, *Journal of Applied Crystallography*, *Journal of Synchrotron Radiation*); however, if you intend to submit to *Acta Crystallographica Section C* or *E* or *IUCrData*, you should make sure that full publication checks are run on the final version of your CIF prior to submission.

### **Publication of your CIF in other journals**

Please refer to the *Notes for Authors* of the relevant journal for any special instructions relating to CIF submission.

---

**PLATON version of 28/11/2022; check.def file version of 28/11/2022**



## checkCIF/PLATON report

You have not supplied any structure factors. As a result the full set of tests cannot be run.

THIS REPORT IS FOR GUIDANCE ONLY. IF USED AS PART OF A REVIEW PROCEDURE FOR PUBLICATION, IT SHOULD NOT REPLACE THE EXPERTISE OF AN EXPERIENCED CRYSTALLOGRAPHIC REFEREE.

No syntax errors found.      CIF dictionary      Interpreting this report

### Datablock: CuI-Quin\_420GPa

---

Bond precision:      C-C = 0.0460 Å      Wavelength=0.31850

Cell:                  a=4.2967(2)                  b=16.9316(9)                  c=12.4932(16)  
                        alpha=87.23(1)                  beta=95.864(10)                  gamma=94.214(5)  
Temperature:          298 K

|                        | Calculated        | Reported               |
|------------------------|-------------------|------------------------|
| Volume                 | 900.92(13)        | 900.93(14)             |
| Space group            | P -1              | P -1                   |
| Hall group             | -P 1              | -P 1                   |
| Moiety formula         | C16 H12 Cu4 I4 N4 | 0.5(C16 H12 Cu4 I4 N4) |
| Sum formula            | C16 H12 Cu4 I4 N4 | C8 H6 Cu2 I2 N2        |
| Mr                     | 1022.10           | 511.03                 |
| Dx, g cm <sup>-3</sup> | 3.768             | 3.768                  |
| Z                      | 2                 | 4                      |
| Mu (mm <sup>-1</sup> ) | 4.942             | 11.524                 |
| F000                   | 928.0             | 928.0                  |
| F000'                  | 922.57            |                        |
| h, k, lmax             | 5, 21, 15         | 5, 21, 7               |
| Nref                   | 4001              | 1222                   |
| Tmin, Tmax             | 0.684, 0.851      | 0.228, 1.000           |
| Tmin'                  | 0.411             |                        |

Correction method= # Reported T Limits: Tmin=0.228 Tmax=1.000  
AbsCorr = MULTI-SCAN

Data completeness= 0.305      Theta(max)= 11.781

|                              |                   |
|------------------------------|-------------------|
| R(reflections)= 0.0871( 798) | wR2(reflections)= |
| S = 1.022                    | 0.2657( 1222)     |
| Npar= 75                     |                   |

---

The following ALERTS were generated. Each ALERT has the format

**test-name\_ALERT\_alert-type\_alert-level.**

Click on the hyperlinks for more details of the test.

---

#### Alert level A

|                   |                                                  |             |
|-------------------|--------------------------------------------------|-------------|
| PLAT051_ALERT_1_A | Mu(calc) and Mu(CIF) Ratio Differs from 1.0 by . | 57.12 %     |
| PLAT201_ALERT_2_A | Isotropic non-H Atoms in Main Residue(s) .....   | 20 Report   |
|                   | N1 N2 N3 N4 C1                                   | etc.        |
| PLAT660_ALERT_1_A | No Valid _diffrn_radiation_type Value Reported . | Please Do ! |

---

#### Alert level B

|                   |                                       |            |
|-------------------|---------------------------------------|------------|
| PLAT342_ALERT_3_B | Low Bond Precision on C-C Bonds ..... | 0.046 Ang. |
|-------------------|---------------------------------------|------------|

---

#### Alert level C

|                   |                                             |             |
|-------------------|---------------------------------------------|-------------|
| PLAT084_ALERT_3_C | High wR2 Value (i.e. > 0.25) .....          | 0.27 Report |
| PLAT112_ALERT_2_C | ADDSYM Detects New (Pseudo) Symm. Elem b/2  | 85 %Fit     |
| PLAT112_ALERT_2_C | ADDSYM Detects New (Pseudo) Symm. Elem 636  | 85 %Fit     |
| PLAT155_ALERT_4_C | The Triclinic Unitcell is NOT Reduced ..... | Please Do ! |

---

#### Alert level G

|                   |                                                  |               |
|-------------------|--------------------------------------------------|---------------|
| PLAT004_ALERT_5_G | Polymeric Structure Found with Maximum Dimension | 2 Info        |
| PLAT012_ALERT_1_G | No _shelx_res_checksum Found in CIF .....        | Please Check  |
| PLAT019_ALERT_1_G | _diffrn_measured_fraction_theta_full/*_max < 1.0 | 0.977 Report  |
| PLAT045_ALERT_1_G | Calculated and Reported Z Differ by a Factor ... | 0.500 Check   |
| PLAT072_ALERT_2_G | SHELXL First Parameter in WGHT Unusually Large   | 0.18 Report   |
| PLAT092_ALERT_4_G | Check: Wavelength Given is not Cu,Ga,Mo,Ag,In Ka | 0.31850 Ang.  |
| PLAT112_ALERT_2_G | ADDSYM Detects New (Pseudo) Symm. Elem sub       | 85 %Fit       |
| PLAT171_ALERT_4_G | The CIF-Embedded .res File Contains EADP Records | 4 Report      |
| PLAT432_ALERT_2_G | Short Inter X...Y Contact I1 ..C11 .             | 3.32 Ang.     |
|                   | 1-x,-y,-z =                                      | 2_655 Check   |
| PLAT432_ALERT_2_G | Short Inter X...Y Contact I1 ..C12 .             | 3.42 Ang.     |
|                   | 1-x,-y,-z =                                      | 2_655 Check   |
| PLAT432_ALERT_2_G | Short Inter X...Y Contact I1 ..C11 .             | 3.45 Ang.     |
|                   | 2-x,-y,-z =                                      | 2_755 Check   |
| PLAT432_ALERT_2_G | Short Inter X...Y Contact I2 ..C7 .              | 3.22 Ang.     |
|                   | 1-x,-y,-z =                                      | 2_655 Check   |
| PLAT432_ALERT_2_G | Short Inter X...Y Contact I2 ..C8 .              | 3.34 Ang.     |
|                   | 1-x,-y,-z =                                      | 2_655 Check   |
| PLAT432_ALERT_2_G | Short Inter X...Y Contact I3 ..C15 .             | 3.27 Ang.     |
|                   | 2-x,-y,1-z =                                     | 2_756 Check   |
| PLAT432_ALERT_2_G | Short Inter X...Y Contact I3 ..C16 .             | 3.42 Ang.     |
|                   | 2-x,-y,1-z =                                     | 2_756 Check   |
| PLAT432_ALERT_2_G | Short Inter X...Y Contact I4 ..C3 .              | 3.36 Ang.     |
|                   | 2-x,-y,1-z =                                     | 2_756 Check   |
| PLAT432_ALERT_2_G | Short Inter X...Y Contact I4 ..C4 .              | 3.38 Ang.     |
|                   | 2-x,-y,1-z =                                     | 2_756 Check   |
| PLAT432_ALERT_2_G | Short Inter X...Y Contact I4 ..C4 .              | 3.43 Ang.     |
|                   | 1-x,-y,1-z =                                     | 2_656 Check   |
| PLAT941_ALERT_3_G | Average HKL Measurement Multiplicity .....       | 1.3 Low       |
| PLAT952_ALERT_5_G | Calculated (ThMax) and CIF-Reported Lmax Differ. | 8 Units       |
| PLAT984_ALERT_1_G | The C-f' = 0.0033 Deviates from the B&C-Value    | -0.0008 Check |

|                   |             |         |                             |         |       |
|-------------------|-------------|---------|-----------------------------|---------|-------|
| PLAT984_ALERT_1_G | The Cu-f' = | 0.3201  | Deviates from the B&C-Value | 0.1660  | Check |
| PLAT984_ALERT_1_G | The I-f' =  | -0.4742 | Deviates from the B&C-Value | -0.8576 | Check |
| PLAT984_ALERT_1_G | The N-f' =  | 0.0061  | Deviates from the B&C-Value | -0.0009 | Check |
| PLAT985_ALERT_1_G | The C-f" =  | 0.0016  | Deviates from the B&C-Value | 0.0003  | Check |
| PLAT985_ALERT_1_G | The Cu-f" = | 1.2651  | Deviates from the B&C-Value | 0.2861  | Check |
| PLAT985_ALERT_1_G | The I-f" =  | 1.8119  | Deviates from the B&C-Value | 2.7116  | Check |
| PLAT985_ALERT_1_G | The N-f" =  | 0.0033  | Deviates from the B&C-Value | 0.0005  | Check |

---

3 **ALERT level A** = Most likely a serious problem - resolve or explain  
 1 **ALERT level B** = A potentially serious problem, consider carefully  
 4 **ALERT level C** = Check. Ensure it is not caused by an omission or oversight  
 28 **ALERT level G** = General information/check it is not something unexpected

13 ALERT type 1 CIF construction/syntax error, inconsistent or missing data  
 15 ALERT type 2 Indicator that the structure model may be wrong or deficient  
 3 ALERT type 3 Indicator that the structure quality may be low  
 3 ALERT type 4 Improvement, methodology, query or suggestion  
 2 ALERT type 5 Informative message, check

---

It is advisable to attempt to resolve as many as possible of the alerts in all categories. Often the minor alerts point to easily fixed oversights, errors and omissions in your CIF or refinement strategy, so attention to these fine details can be worthwhile. In order to resolve some of the more serious problems it may be necessary to carry out additional measurements or structure refinements. However, the purpose of your study may justify the reported deviations and the more serious of these should normally be commented upon in the discussion or experimental section of a paper or in the "special\_details" fields of the CIF. checkCIF was carefully designed to identify outliers and unusual parameters, but every test has its limitations and alerts that are not important in a particular case may appear. Conversely, the absence of alerts does not guarantee there are no aspects of the results needing attention. It is up to the individual to critically assess their own results and, if necessary, seek expert advice.

### Publication of your CIF in IUCr journals

A basic structural check has been run on your CIF. These basic checks will be run on all CIFs submitted for publication in IUCr journals (*Acta Crystallographica*, *Journal of Applied Crystallography*, *Journal of Synchrotron Radiation*); however, if you intend to submit to *Acta Crystallographica Section C* or *E* or *IUCrData*, you should make sure that full publication checks are run on the final version of your CIF prior to submission.

### Publication of your CIF in other journals

Please refer to the *Notes for Authors* of the relevant journal for any special instructions relating to CIF submission.



```
R(reflections)= 0.0728( 780)      wR2(reflections)=
S = 1.070                        0.2302( 1165)
Npar= 75
```

---

The following ALERTS were generated. Each ALERT has the format

**test-name\_ALERT\_alert-type\_alert-level.**

Click on the hyperlinks for more details of the test.

---

#### Alert level A

|                   |                                                  |             |
|-------------------|--------------------------------------------------|-------------|
| PLAT051_ALERT_1_A | Mu(calc) and Mu(CIF) Ratio Differs from 1.0 by . | 57.11 %     |
| PLAT201_ALERT_2_A | Isotropic non-H Atoms in Main Residue(s) .....   | 20 Report   |
|                   | N1 N2 N3 N4 C1                                   | etc.        |
| PLAT660_ALERT_1_A | No Valid _diffrn_radiation_type Value Reported . | Please Do ! |

---

#### Alert level B

|                   |                                       |              |
|-------------------|---------------------------------------|--------------|
| PLAT342_ALERT_3_B | Low Bond Precision on C-C Bonds ..... | 0.03757 Ang. |
|-------------------|---------------------------------------|--------------|

---

#### Alert level C

|                   |                                                  |     |             |
|-------------------|--------------------------------------------------|-----|-------------|
| PLAT112_ALERT_2_C | ADDSYM Detects New (Pseudo) Symm. Elem           | b/2 | 85 %Fit     |
| PLAT112_ALERT_2_C | ADDSYM Detects New (Pseudo) Symm. Elem           | 636 | 85 %Fit     |
| PLAT155_ALERT_4_C | The Triclinic Unitcell is NOT Reduced .....      |     | Please Do ! |
| PLAT250_ALERT_2_C | Large U3/U1 Ratio for Average U(i,j) Tensor .... |     | 3.0 Note    |
| PLAT702_ALERT_1_C | Angle Calc 107.4(5), Rep 108(3), Dev..           |     | 1.20 Sigma  |
|                   | N4 -CU4 -I3 1_545 1_555 1_455 #                  |     | 49 Check    |

---

#### Alert level G

|                   |                                                  |              |              |
|-------------------|--------------------------------------------------|--------------|--------------|
| PLAT004_ALERT_5_G | Polymeric Structure Found with Maximum Dimension |              | 2 Info       |
| PLAT012_ALERT_1_G | No _shelx_res_checksum Found in CIF .....        |              | Please Check |
| PLAT019_ALERT_1_G | _diffrn_measured_fraction_theta_full/*_max < 1.0 |              | 0.973 Report |
| PLAT045_ALERT_1_G | Calculated and Reported Z Differ by a Factor ... |              | 0.500 Check  |
| PLAT072_ALERT_2_G | SHELXL First Parameter in WGHT Unusually Large   |              | 0.14 Report  |
| PLAT092_ALERT_4_G | Check: Wavelength Given is not Cu,Ga,Mo,Ag,In Ka |              | 0.31850 Ang. |
| PLAT112_ALERT_2_G | ADDSYM Detects New (Pseudo) Symm. Elem           | sub          | 85 %Fit      |
| PLAT171_ALERT_4_G | The CIF-Embedded .res File Contains EADP Records |              | 4 Report     |
| PLAT335_ALERT_2_G | Check Large C6 Ring C-C Range C9                 | -C14         | 0.19 Ang.    |
| PLAT432_ALERT_2_G | Short Inter X...Y Contact I1                     | ..C11 .      | 3.37 Ang.    |
|                   |                                                  | 1-x,-y,-z =  | 2_655 Check  |
| PLAT432_ALERT_2_G | Short Inter X...Y Contact I1                     | ..C11 .      | 3.44 Ang.    |
|                   |                                                  | 2-x,-y,-z =  | 2_755 Check  |
| PLAT432_ALERT_2_G | Short Inter X...Y Contact I1                     | ..C12 .      | 3.47 Ang.    |
|                   |                                                  | 1-x,-y,-z =  | 2_655 Check  |
| PLAT432_ALERT_2_G | Short Inter X...Y Contact I2                     | ..C7 .       | 3.22 Ang.    |
|                   |                                                  | 1-x,-y,-z =  | 2_655 Check  |
| PLAT432_ALERT_2_G | Short Inter X...Y Contact I2                     | ..C8 .       | 3.33 Ang.    |
|                   |                                                  | 1-x,-y,-z =  | 2_655 Check  |
| PLAT432_ALERT_2_G | Short Inter X...Y Contact I3                     | ..C15 .      | 3.19 Ang.    |
|                   |                                                  | 2-x,-y,1-z = | 2_756 Check  |
| PLAT432_ALERT_2_G | Short Inter X...Y Contact I3                     | ..C16 .      | 3.29 Ang.    |
|                   |                                                  | 2-x,-y,1-z = | 2_756 Check  |
| PLAT432_ALERT_2_G | Short Inter X...Y Contact I4                     | ..C3 .       | 3.29 Ang.    |
|                   |                                                  | 2-x,-y,1-z = | 2_756 Check  |
| PLAT432_ALERT_2_G | Short Inter X...Y Contact I4                     | ..C4 .       | 3.40 Ang.    |
|                   |                                                  | 2-x,-y,1-z = | 2_756 Check  |
| PLAT941_ALERT_3_G | Average HKL Measurement Multiplicity .....       |              | 1.3 Low      |
| PLAT952_ALERT_5_G | Calculated (ThMax) and CIF-Reported Lmax Differ. |              | 8 Units      |

|                   |     |         |         |                             |         |       |
|-------------------|-----|---------|---------|-----------------------------|---------|-------|
| PLAT984_ALERT_1_G | The | C-f' =  | 0.0033  | Deviates from the B&C-Value | -0.0008 | Check |
| PLAT984_ALERT_1_G | The | Cu-f' = | 0.3201  | Deviates from the B&C-Value | 0.1660  | Check |
| PLAT984_ALERT_1_G | The | I-f' =  | -0.4742 | Deviates from the B&C-Value | -0.8576 | Check |
| PLAT984_ALERT_1_G | The | N-f' =  | 0.0061  | Deviates from the B&C-Value | -0.0009 | Check |
| PLAT985_ALERT_1_G | The | C-f" =  | 0.0016  | Deviates from the B&C-Value | 0.0003  | Check |
| PLAT985_ALERT_1_G | The | Cu-f" = | 1.2651  | Deviates from the B&C-Value | 0.2861  | Check |
| PLAT985_ALERT_1_G | The | I-f" =  | 1.8119  | Deviates from the B&C-Value | 2.7116  | Check |
| PLAT985_ALERT_1_G | The | N-f" =  | 0.0033  | Deviates from the B&C-Value | 0.0005  | Check |

---

3 **ALERT level A** = Most likely a serious problem - resolve or explain  
 1 **ALERT level B** = A potentially serious problem, consider carefully  
 5 **ALERT level C** = Check. Ensure it is not caused by an omission or oversight  
 28 **ALERT level G** = General information/check it is not something unexpected

14 ALERT type 1 CIF construction/syntax error, inconsistent or missing data  
 16 ALERT type 2 Indicator that the structure model may be wrong or deficient  
 2 ALERT type 3 Indicator that the structure quality may be low  
 3 ALERT type 4 Improvement, methodology, query or suggestion  
 2 ALERT type 5 Informative message, check

---

It is advisable to attempt to resolve as many as possible of the alerts in all categories. Often the minor alerts point to easily fixed oversights, errors and omissions in your CIF or refinement strategy, so attention to these fine details can be worthwhile. In order to resolve some of the more serious problems it may be necessary to carry out additional measurements or structure refinements. However, the purpose of your study may justify the reported deviations and the more serious of these should normally be commented upon in the discussion or experimental section of a paper or in the "special\_details" fields of the CIF. checkCIF was carefully designed to identify outliers and unusual parameters, but every test has its limitations and alerts that are not important in a particular case may appear. Conversely, the absence of alerts does not guarantee there are no aspects of the results needing attention. It is up to the individual to critically assess their own results and, if necessary, seek expert advice.

### Publication of your CIF in IUCr journals

A basic structural check has been run on your CIF. These basic checks will be run on all CIFs submitted for publication in IUCr journals (*Acta Crystallographica*, *Journal of Applied Crystallography*, *Journal of Synchrotron Radiation*); however, if you intend to submit to *Acta Crystallographica Section C* or *E* or *IUCrData*, you should make sure that **full publication checks** are run on the final version of your CIF prior to submission.

### Publication of your CIF in other journals

Please refer to the *Notes for Authors* of the relevant journal for any special instructions relating to CIF submission.



## checkCIF/PLATON report

You have not supplied any structure factors. As a result the full set of tests cannot be run.

THIS REPORT IS FOR GUIDANCE ONLY. IF USED AS PART OF A REVIEW PROCEDURE FOR PUBLICATION, IT SHOULD NOT REPLACE THE EXPERTISE OF AN EXPERIENCED CRYSTALLOGRAPHIC REFEREE.

No syntax errors found.      CIF dictionary      Interpreting this report

### Datablock: CuI-Quin\_543GPa

---

Bond precision:      C-C = 0.0392 Å      Wavelength=0.31850

Cell:                      a=4.2732 (2)                      b=16.7757 (8)                      c=12.3479 (15)  
                             alpha=86.492 (9)                      beta=96.410 (9)                      gamma=94.934 (4)  
Temperature:              298 K

|                        | Calculated        | Reported                |
|------------------------|-------------------|-------------------------|
| Volume                 | 875.19 (12)       | 875.19 (12)             |
| Space group            | P -1              | P -1                    |
| Hall group             | -P 1              | -P 1                    |
| Moiety formula         | C16 H12 Cu4 I4 N4 | 0.5 (C16 H12 Cu4 I4 N4) |
| Sum formula            | C16 H12 Cu4 I4 N4 | C8 H6 Cu2 I2 N2         |
| Mr                     | 1022.10           | 511.03                  |
| Dx, g cm <sup>-3</sup> | 3.879             | 3.878                   |
| Z                      | 2                 | 4                       |
| Mu (mm <sup>-1</sup> ) | 5.087             | 11.863                  |
| F000                   | 928.0             | 928.0                   |
| F000'                  | 922.57            |                         |
| h, k, lmax             | 5, 21, 15         | 5, 21, 7                |
| Nref                   | 3874              | 1188                    |
| Tmin, Tmax             | 0.675, 0.847      | 0.352, 1.000            |
| Tmin'                  | 0.401             |                         |

Correction method= # Reported T Limits: Tmin=0.352 Tmax=1.000  
AbsCorr = MULTI-SCAN

Data completeness= 0.307      Theta (max)= 11.778

|                               |                                  |
|-------------------------------|----------------------------------|
| R(reflections)= 0.0706 ( 779) | wR2(reflections)= 0.2245 ( 1188) |
| S = 1.088                     | Npar= 75                         |

---

The following ALERTS were generated. Each ALERT has the format

**test-name\_ALERT\_alert-type\_alert-level.**

Click on the hyperlinks for more details of the test.

---

#### Alert level A

|                   |                                                  |             |
|-------------------|--------------------------------------------------|-------------|
| PLAT051_ALERT_1_A | Mu(calc) and Mu(CIF) Ratio Differs from 1.0 by . | 57.12 %     |
| PLAT201_ALERT_2_A | Isotropic non-H Atoms in Main Residue(s) .....   | 20 Report   |
|                   | N1 N2 N3 N4 C1                                   | etc.        |
| PLAT660_ALERT_1_A | No Valid _diffrn_radiation_type Value Reported . | Please Do ! |

---

#### Alert level B

|                   |                                                  |              |
|-------------------|--------------------------------------------------|--------------|
| PLAT250_ALERT_2_B | Large U3/U1 Ratio for Average U(i,j) Tensor .... | 4.7 Note     |
| PLAT342_ALERT_3_B | Low Bond Precision on C-C Bonds .....            | 0.03921 Ang. |

---

#### Alert level C

|                   |                                             |     |             |
|-------------------|---------------------------------------------|-----|-------------|
| PLAT112_ALERT_2_C | ADDSYM Detects New (Pseudo) Symm. Elem      | b/2 | 85 %Fit     |
| PLAT112_ALERT_2_C | ADDSYM Detects New (Pseudo) Symm. Elem      | 636 | 85 %Fit     |
| PLAT155_ALERT_4_C | The Triclinic Unitcell is NOT Reduced ..... |     | Please Do ! |

---

#### Alert level G

|                   |                                                  |         |              |
|-------------------|--------------------------------------------------|---------|--------------|
| PLAT004_ALERT_5_G | Polymeric Structure Found with Maximum Dimension | 2       | Info         |
| PLAT012_ALERT_1_G | No _shelx_res_checksum Found in CIF .....        |         | Please Check |
| PLAT019_ALERT_1_G | _diffrn_measured_fraction_theta_full/*_max < 1.0 | 0.974   | Report       |
| PLAT045_ALERT_1_G | Calculated and Reported Z Differ by a Factor ... | 0.500   | Check        |
| PLAT072_ALERT_2_G | SHELXL First Parameter in WGHT Unusually Large   | 0.13    | Report       |
| PLAT092_ALERT_4_G | Check: Wavelength Given is not Cu,Ga,Mo,Ag,In Ka | 0.31850 | Ang.         |
| PLAT112_ALERT_2_G | ADDSYM Detects New (Pseudo) Symm. Elem           | sub     | 85 %Fit      |
| PLAT171_ALERT_4_G | The CIF-Embedded .res File Contains EADP Records | 4       | Report       |
| PLAT232_ALERT_2_G | Hirshfeld Test Diff (M-X) I1 --Cu1 .             | 5.3     | s.u.         |
| PLAT432_ALERT_2_G | Short Inter X...Y Contact I1 ..C11 .             | 3.37    | Ang.         |
|                   | 1-x,-y,-z =                                      | 2_655   | Check        |
| PLAT432_ALERT_2_G | Short Inter X...Y Contact I1 ..C12 .             | 3.40    | Ang.         |
|                   | 1-x,-y,-z =                                      | 2_655   | Check        |
| PLAT432_ALERT_2_G | Short Inter X...Y Contact I1 ..C11 .             | 3.46    | Ang.         |
|                   | 2-x,-y,-z =                                      | 2_755   | Check        |
| PLAT432_ALERT_2_G | Short Inter X...Y Contact I2 ..C7 .              | 3.20    | Ang.         |
|                   | 1-x,-y,-z =                                      | 2_655   | Check        |
| PLAT432_ALERT_2_G | Short Inter X...Y Contact I2 ..C8 .              | 3.31    | Ang.         |
|                   | 1-x,-y,-z =                                      | 2_655   | Check        |
| PLAT432_ALERT_2_G | Short Inter X...Y Contact I3 ..C15 .             | 3.22    | Ang.         |
|                   | 2-x,-y,1-z =                                     | 2_756   | Check        |
| PLAT432_ALERT_2_G | Short Inter X...Y Contact I3 ..C16 .             | 3.31    | Ang.         |
|                   | 2-x,-y,1-z =                                     | 2_756   | Check        |
| PLAT432_ALERT_2_G | Short Inter X...Y Contact I4 ..C3 .              | 3.36    | Ang.         |
|                   | 2-x,-y,1-z =                                     | 2_756   | Check        |
| PLAT432_ALERT_2_G | Short Inter X...Y Contact I4 ..C4 .              | 3.38    | Ang.         |
|                   | 2-x,-y,1-z =                                     | 2_756   | Check        |
| PLAT941_ALERT_3_G | Average HKL Measurement Multiplicity .....       | 1.3     | Low          |
| PLAT952_ALERT_5_G | Calculated (ThMax) and CIF-Reported lmax Differ. | 8       | Units        |
| PLAT984_ALERT_1_G | The C-f' = 0.0033 Deviates from the B&C-Value    | -0.0008 | Check        |
| PLAT984_ALERT_1_G | The Cu-f' = 0.3201 Deviates from the B&C-Value   | 0.1660  | Check        |

|                   |     |         |         |                             |         |       |
|-------------------|-----|---------|---------|-----------------------------|---------|-------|
| PLAT984_ALERT_1_G | The | I-f' =  | -0.4742 | Deviates from the B&C-Value | -0.8576 | Check |
| PLAT984_ALERT_1_G | The | N-f' =  | 0.0061  | Deviates from the B&C-Value | -0.0009 | Check |
| PLAT985_ALERT_1_G | The | C-f" =  | 0.0016  | Deviates from the B&C-Value | 0.0003  | Check |
| PLAT985_ALERT_1_G | The | Cu-f" = | 1.2651  | Deviates from the B&C-Value | 0.2861  | Check |
| PLAT985_ALERT_1_G | The | I-f" =  | 1.8119  | Deviates from the B&C-Value | 2.7116  | Check |
| PLAT985_ALERT_1_G | The | N-f" =  | 0.0033  | Deviates from the B&C-Value | 0.0005  | Check |

---

3 **ALERT level A** = Most likely a serious problem - resolve or explain  
 2 **ALERT level B** = A potentially serious problem, consider carefully  
 3 **ALERT level C** = Check. Ensure it is not caused by an omission or oversight  
 28 **ALERT level G** = General information/check it is not something unexpected

13 ALERT type 1 CIF construction/syntax error, inconsistent or missing data  
 16 ALERT type 2 Indicator that the structure model may be wrong or deficient  
 2 ALERT type 3 Indicator that the structure quality may be low  
 3 ALERT type 4 Improvement, methodology, query or suggestion  
 2 ALERT type 5 Informative message, check

---

It is advisable to attempt to resolve as many as possible of the alerts in all categories. Often the minor alerts point to easily fixed oversights, errors and omissions in your CIF or refinement strategy, so attention to these fine details can be worthwhile. In order to resolve some of the more serious problems it may be necessary to carry out additional measurements or structure refinements. However, the purpose of your study may justify the reported deviations and the more serious of these should normally be commented upon in the discussion or experimental section of a paper or in the "special\_details" fields of the CIF. checkCIF was carefully designed to identify outliers and unusual parameters, but every test has its limitations and alerts that are not important in a particular case may appear. Conversely, the absence of alerts does not guarantee there are no aspects of the results needing attention. It is up to the individual to critically assess their own results and, if necessary, seek expert advice.

### Publication of your CIF in IUCr journals

A basic structural check has been run on your CIF. These basic checks will be run on all CIFs submitted for publication in IUCr journals (*Acta Crystallographica*, *Journal of Applied Crystallography*, *Journal of Synchrotron Radiation*); however, if you intend to submit to *Acta Crystallographica Section C* or *E* or *IUCrData*, you should make sure that full publication checks are run on the final version of your CIF prior to submission.

### Publication of your CIF in other journals

Please refer to the *Notes for Authors* of the relevant journal for any special instructions relating to CIF submission.



```
R(reflections)= 0.0657( 794)      wR2(reflections)=
S = 1.087                        0.2177( 1173)
Npar= 75
```

---

The following ALERTS were generated. Each ALERT has the format

**test-name\_ALERT\_alert-type\_alert-level.**

Click on the hyperlinks for more details of the test.

---

#### Alert level A

|                   |                                                  |             |
|-------------------|--------------------------------------------------|-------------|
| PLAT051_ALERT_1_A | Mu(calc) and Mu(CIF) Ratio Differs from 1.0 by . | 57.12 %     |
| PLAT201_ALERT_2_A | Isotropic non-H Atoms in Main Residue(s) .....   | 20 Report   |
|                   | N1 N2 N3 N4 C1                                   | etc.        |
| PLAT660_ALERT_1_A | No Valid _diffrn_radiation_type Value Reported . | Please Do ! |

---

#### Alert level B

|                   |                                       |              |
|-------------------|---------------------------------------|--------------|
| PLAT342_ALERT_3_B | Low Bond Precision on C-C Bonds ..... | 0.03736 Ang. |
|-------------------|---------------------------------------|--------------|

---

#### Alert level C

|                   |                                             |     |             |
|-------------------|---------------------------------------------|-----|-------------|
| PLAT112_ALERT_2_C | ADDSYM Detects New (Pseudo) Symm. Elem      | b/2 | 85 %Fit     |
| PLAT112_ALERT_2_C | ADDSYM Detects New (Pseudo) Symm. Elem      | 636 | 85 %Fit     |
| PLAT155_ALERT_4_C | The Triclinic Unitcell is NOT Reduced ..... |     | Please Do ! |

---

#### Alert level G

|                   |                                                  |         |              |
|-------------------|--------------------------------------------------|---------|--------------|
| PLAT004_ALERT_5_G | Polymeric Structure Found with Maximum Dimension | 2       | Info         |
| PLAT012_ALERT_1_G | No _shelx_res_checksum Found in CIF .....        |         | Please Check |
| PLAT019_ALERT_1_G | _diffrn_measured_fraction_theta_full/*_max < 1.0 | 0.968   | Report       |
| PLAT045_ALERT_1_G | Calculated and Reported Z Differ by a Factor ... | 0.500   | Check        |
| PLAT072_ALERT_2_G | SHELXL First Parameter in WGHT Unusually Large   | 0.13    | Report       |
| PLAT092_ALERT_4_G | Check: Wavelength Given is not Cu,Ga,Mo,Ag,In Ka | 0.31850 | Ang.         |
| PLAT112_ALERT_2_G | ADDSYM Detects New (Pseudo) Symm. Elem           | sub     | 85 %Fit      |
| PLAT171_ALERT_4_G | The CIF-Embedded .res File Contains EADP Records | 4       | Report       |
| PLAT432_ALERT_2_G | Short Inter X...Y Contact I1 ..C11 .             | 3.36    | Ang.         |
|                   | 1-x,-y,-z =                                      | 2_655   | Check        |
| PLAT432_ALERT_2_G | Short Inter X...Y Contact I1 ..C12 .             | 3.37    | Ang.         |
|                   | 1-x,-y,-z =                                      | 2_655   | Check        |
| PLAT432_ALERT_2_G | Short Inter X...Y Contact I1 ..C11 .             | 3.48    | Ang.         |
|                   | 2-x,-y,-z =                                      | 2_755   | Check        |
| PLAT432_ALERT_2_G | Short Inter X...Y Contact I2 ..C7 .              | 3.18    | Ang.         |
|                   | 1-x,-y,-z =                                      | 2_655   | Check        |
| PLAT432_ALERT_2_G | Short Inter X...Y Contact I2 ..C8 .              | 3.28    | Ang.         |
|                   | 1-x,-y,-z =                                      | 2_655   | Check        |
| PLAT432_ALERT_2_G | Short Inter X...Y Contact I3 ..C15 .             | 3.17    | Ang.         |
|                   | 2-x,-y,1-z =                                     | 2_756   | Check        |
| PLAT432_ALERT_2_G | Short Inter X...Y Contact I3 ..C16 .             | 3.23    | Ang.         |
|                   | 2-x,-y,1-z =                                     | 2_756   | Check        |
| PLAT432_ALERT_2_G | Short Inter X...Y Contact I3 ..C15 .             | 3.47    | Ang.         |
|                   | 1-x,-y,1-z =                                     | 2_656   | Check        |
| PLAT432_ALERT_2_G | Short Inter X...Y Contact I4 ..C3 .              | 3.29    | Ang.         |
|                   | 2-x,-y,1-z =                                     | 2_756   | Check        |
| PLAT432_ALERT_2_G | Short Inter X...Y Contact I4 ..C4 .              | 3.40    | Ang.         |
|                   | 2-x,-y,1-z =                                     | 2_756   | Check        |
| PLAT941_ALERT_3_G | Average HKL Measurement Multiplicity .....       | 1.3     | Low          |
| PLAT952_ALERT_5_G | Calculated (ThMax) and CIF-Reported Lmax Differ. | 8       | Units        |
| PLAT984_ALERT_1_G | The C-f' = 0.0033 Deviates from the B&C-Value    | -0.0008 | Check        |
| PLAT984_ALERT_1_G | The Cu-f' = 0.3201 Deviates from the B&C-Value   | 0.1660  | Check        |

|                   |     |         |         |                             |         |       |
|-------------------|-----|---------|---------|-----------------------------|---------|-------|
| PLAT984_ALERT_1_G | The | I-f' =  | -0.4742 | Deviates from the B&C-Value | -0.8576 | Check |
| PLAT984_ALERT_1_G | The | N-f' =  | 0.0061  | Deviates from the B&C-Value | -0.0009 | Check |
| PLAT985_ALERT_1_G | The | C-f" =  | 0.0016  | Deviates from the B&C-Value | 0.0003  | Check |
| PLAT985_ALERT_1_G | The | Cu-f" = | 1.2651  | Deviates from the B&C-Value | 0.2861  | Check |
| PLAT985_ALERT_1_G | The | I-f" =  | 1.8119  | Deviates from the B&C-Value | 2.7116  | Check |
| PLAT985_ALERT_1_G | The | N-f" =  | 0.0033  | Deviates from the B&C-Value | 0.0005  | Check |

---

3 **ALERT level A** = Most likely a serious problem - resolve or explain  
 1 **ALERT level B** = A potentially serious problem, consider carefully  
 3 **ALERT level C** = Check. Ensure it is not caused by an omission or oversight  
 28 **ALERT level G** = General information/check it is not something unexpected

13 ALERT type 1 CIF construction/syntax error, inconsistent or missing data  
 15 ALERT type 2 Indicator that the structure model may be wrong or deficient  
 2 ALERT type 3 Indicator that the structure quality may be low  
 3 ALERT type 4 Improvement, methodology, query or suggestion  
 2 ALERT type 5 Informative message, check

---

It is advisable to attempt to resolve as many as possible of the alerts in all categories. Often the minor alerts point to easily fixed oversights, errors and omissions in your CIF or refinement strategy, so attention to these fine details can be worthwhile. In order to resolve some of the more serious problems it may be necessary to carry out additional measurements or structure refinements. However, the purpose of your study may justify the reported deviations and the more serious of these should normally be commented upon in the discussion or experimental section of a paper or in the "special\_details" fields of the CIF. checkCIF was carefully designed to identify outliers and unusual parameters, but every test has its limitations and alerts that are not important in a particular case may appear. Conversely, the absence of alerts does not guarantee there are no aspects of the results needing attention. It is up to the individual to critically assess their own results and, if necessary, seek expert advice.

### Publication of your CIF in IUCr journals

A basic structural check has been run on your CIF. These basic checks will be run on all CIFs submitted for publication in IUCr journals (*Acta Crystallographica*, *Journal of Applied Crystallography*, *Journal of Synchrotron Radiation*); however, if you intend to submit to *Acta Crystallographica Section C* or *E* or *IUCrData*, you should make sure that full publication checks are run on the final version of your CIF prior to submission.

### Publication of your CIF in other journals

Please refer to the *Notes for Authors* of the relevant journal for any special instructions relating to CIF submission.



## checkCIF/PLATON report

You have not supplied any structure factors. As a result the full set of tests cannot be run.

THIS REPORT IS FOR GUIDANCE ONLY. IF USED AS PART OF A REVIEW PROCEDURE FOR PUBLICATION, IT SHOULD NOT REPLACE THE EXPERTISE OF AN EXPERIENCED CRYSTALLOGRAPHIC REFEREE.

No syntax errors found.      CIF dictionary      Interpreting this report

### Datablock: CuI-Quin\_700GPa

---

Bond precision:      C-C = 0.0381 Å      Wavelength=0.31850

Cell:                      a=4.2434(3)                      b=16.6059(13)                      c=12.2104(19)  
                              alpha=86.177(15)                      beta=96.911(15)                      gamma=95.458(7)  
Temperature:      298 K

|                        | Calculated        | Reported               |
|------------------------|-------------------|------------------------|
| Volume                 | 848.96(16)        | 848.96(17)             |
| Space group            | P -1              | P -1                   |
| Hall group             | -P 1              | -P 1                   |
| Moiety formula         | C16 H12 Cu4 I4 N4 | 0.5(C16 H12 Cu4 I4 N4) |
| Sum formula            | C16 H12 Cu4 I4 N4 | C8 H6 Cu2 I2 N2        |
| Mr                     | 1022.10           | 511.03                 |
| Dx, g cm <sup>-3</sup> | 3.998             | 3.998                  |
| Z                      | 2                 | 4                      |
| Mu (mm <sup>-1</sup> ) | 5.244             | 12.229                 |
| F000                   | 928.0             | 928.0                  |
| F000'                  | 922.57            |                        |
| h, k, lmax             | 5, 21, 15         | 5, 21, 7               |
| Nref                   | 3748              | 1123                   |
| Tmin, Tmax             | 0.666, 0.843      | 0.589, 1.000           |
| Tmin'                  | 0.390             |                        |

Correction method= # Reported T Limits: Tmin=0.589 Tmax=1.000  
AbsCorr = MULTI-SCAN

Data completeness= 0.300      Theta(max)= 11.774

|                              |                                 |
|------------------------------|---------------------------------|
| R(reflections)= 0.0667( 671) | wR2(reflections)= 0.2242( 1123) |
| S = 1.061                    | Npar= 75                        |

---

The following ALERTS were generated. Each ALERT has the format

**test-name\_ALERT\_alert-type\_alert-level.**

Click on the hyperlinks for more details of the test.

---

#### Alert level A

|                   |                                                  |             |
|-------------------|--------------------------------------------------|-------------|
| PLAT051_ALERT_1_A | Mu(calc) and Mu(CIF) Ratio Differs from 1.0 by . | 57.12 %     |
| PLAT201_ALERT_2_A | Isotropic non-H Atoms in Main Residue(s) .....   | 20 Report   |
|                   | N1 N2 N3 N4 C1                                   | etc.        |
| PLAT660_ALERT_1_A | No Valid _diffrn_radiation_type Value Reported . | Please Do ! |

---

#### Alert level B

|                   |                                       |              |
|-------------------|---------------------------------------|--------------|
| PLAT342_ALERT_3_B | Low Bond Precision on C-C Bonds ..... | 0.03814 Ang. |
|-------------------|---------------------------------------|--------------|

---

#### Alert level C

|                   |                                                  |     |             |
|-------------------|--------------------------------------------------|-----|-------------|
| PLAT112_ALERT_2_C | ADDSYM Detects New (Pseudo) Symm. Elem           | b/2 | 85 %Fit     |
| PLAT112_ALERT_2_C | ADDSYM Detects New (Pseudo) Symm. Elem           | 636 | 85 %Fit     |
| PLAT155_ALERT_4_C | The Triclinic Unitcell is NOT Reduced .....      |     | Please Do ! |
| PLAT250_ALERT_2_C | Large U3/U1 Ratio for Average U(i,j) Tensor .... |     | 3.4 Note    |
| PLAT368_ALERT_2_C | Short C(sp2)-C(sp2) Bond C4 - C5 .               |     | 1.21 Ang.   |

---

#### Alert level G

|                   |                                                  |       |              |
|-------------------|--------------------------------------------------|-------|--------------|
| PLAT004_ALERT_5_G | Polymeric Structure Found with Maximum Dimension |       | 2 Info       |
| PLAT012_ALERT_1_G | No _shelx_res_checksum Found in CIF .....        |       | Please Check |
| PLAT019_ALERT_1_G | _diffrn_measured_fraction_theta_full/*_max < 1.0 |       | 0.957 Report |
| PLAT045_ALERT_1_G | Calculated and Reported Z Differ by a Factor ... |       | 0.500 Check  |
| PLAT072_ALERT_2_G | SHELXL First Parameter in WGHT Unusually Large   |       | 0.13 Report  |
| PLAT092_ALERT_4_G | Check: Wavelength Given is not Cu,Ga,Mo,Ag,In Ka |       | 0.31850 Ang. |
| PLAT112_ALERT_2_G | ADDSYM Detects New (Pseudo) Symm. Elem           | sub   | 85 %Fit      |
| PLAT171_ALERT_4_G | The CIF-Embedded .res File Contains EADP Records |       | 4 Report     |
| PLAT335_ALERT_2_G | Check Large C6 Ring C-C Range C1 -C6             |       | 0.25 Ang.    |
| PLAT335_ALERT_2_G | Check Large C6 Ring C-C Range C9 -C14            |       | 0.16 Ang.    |
| PLAT432_ALERT_2_G | Short Inter X...Y Contact I1 ..C11 .             |       | 3.30 Ang.    |
|                   | 1-x,-y,-z =                                      | 2_655 | Check        |
| PLAT432_ALERT_2_G | Short Inter X...Y Contact I1 ..C12 .             |       | 3.34 Ang.    |
|                   | 1-x,-y,-z =                                      | 2_655 | Check        |
| PLAT432_ALERT_2_G | Short Inter X...Y Contact I1 ..C11 .             |       | 3.40 Ang.    |
|                   | 2-x,-y,-z =                                      | 2_755 | Check        |
| PLAT432_ALERT_2_G | Short Inter X...Y Contact I2 ..C7 .              |       | 3.14 Ang.    |
|                   | 1-x,-y,-z =                                      | 2_655 | Check        |
| PLAT432_ALERT_2_G | Short Inter X...Y Contact I2 ..C8 .              |       | 3.22 Ang.    |
|                   | 1-x,-y,-z =                                      | 2_655 | Check        |
| PLAT432_ALERT_2_G | Short Inter X...Y Contact I2 ..C8 .              |       | 3.48 Ang.    |
|                   | 2-x,-y,-z =                                      | 2_755 | Check        |
| PLAT432_ALERT_2_G | Short Inter X...Y Contact I3 ..C15 .             |       | 3.19 Ang.    |
|                   | 2-x,-y,1-z =                                     | 2_756 | Check        |
| PLAT432_ALERT_2_G | Short Inter X...Y Contact I3 ..C16 .             |       | 3.24 Ang.    |
|                   | 2-x,-y,1-z =                                     | 2_756 | Check        |
| PLAT432_ALERT_2_G | Short Inter X...Y Contact I3 ..C15 .             |       | 3.48 Ang.    |
|                   | 1-x,-y,1-z =                                     | 2_656 | Check        |
| PLAT432_ALERT_2_G | Short Inter X...Y Contact I4 ..C3 .              |       | 3.32 Ang.    |
|                   | 2-x,-y,1-z =                                     | 2_756 | Check        |

```

PLAT432_ALERT_2_G Short Inter X...Y Contact I4 ..C4 . 3.40 Ang.
2-x,-y,1-z = 2_756 Check
PLAT941_ALERT_3_G Average HKL Measurement Multiplicity ..... 1.3 Low
PLAT952_ALERT_5_G Calculated (ThMax) and CIF-Reported Lmax Differ. 8 Units
PLAT984_ALERT_1_G The C-f' = 0.0033 Deviates from the B&C-Value -0.0008 Check
PLAT984_ALERT_1_G The Cu-f' = 0.3201 Deviates from the B&C-Value 0.1660 Check
PLAT984_ALERT_1_G The I-f' = -0.4742 Deviates from the B&C-Value -0.8576 Check
PLAT984_ALERT_1_G The N-f' = 0.0061 Deviates from the B&C-Value -0.0009 Check
PLAT985_ALERT_1_G The C-f" = 0.0016 Deviates from the B&C-Value 0.0003 Check
PLAT985_ALERT_1_G The Cu-f" = 1.2651 Deviates from the B&C-Value 0.2861 Check
PLAT985_ALERT_1_G The I-f" = 1.8119 Deviates from the B&C-Value 2.7116 Check
PLAT985_ALERT_1_G The N-f" = 0.0033 Deviates from the B&C-Value 0.0005 Check

```

---

```

3 ALERT level A = Most likely a serious problem - resolve or explain
1 ALERT level B = A potentially serious problem, consider carefully
5 ALERT level C = Check. Ensure it is not caused by an omission or oversight
31 ALERT level G = General information/check it is not something unexpected

13 ALERT type 1 CIF construction/syntax error, inconsistent or missing data
20 ALERT type 2 Indicator that the structure model may be wrong or deficient
2 ALERT type 3 Indicator that the structure quality may be low
3 ALERT type 4 Improvement, methodology, query or suggestion
2 ALERT type 5 Informative message, check

```

---

It is advisable to attempt to resolve as many as possible of the alerts in all categories. Often the minor alerts point to easily fixed oversights, errors and omissions in your CIF or refinement strategy, so attention to these fine details can be worthwhile. In order to resolve some of the more serious problems it may be necessary to carry out additional measurements or structure refinements. However, the purpose of your study may justify the reported deviations and the more serious of these should normally be commented upon in the discussion or experimental section of a paper or in the "special\_details" fields of the CIF. checkCIF was carefully designed to identify outliers and unusual parameters, but every test has its limitations and alerts that are not important in a particular case may appear. Conversely, the absence of alerts does not guarantee there are no aspects of the results needing attention. It is up to the individual to critically assess their own results and, if necessary, seek expert advice.

### Publication of your CIF in IUCr journals

A basic structural check has been run on your CIF. These basic checks will be run on all CIFs submitted for publication in IUCr journals (*Acta Crystallographica*, *Journal of Applied Crystallography*, *Journal of Synchrotron Radiation*); however, if you intend to submit to *Acta Crystallographica Section C* or *E* or *IUCrData*, you should make sure that full publication checks are run on the final version of your CIF prior to submission.

### Publication of your CIF in other journals

Please refer to the *Notes for Authors* of the relevant journal for any special instructions relating to CIF submission.

PLATON version of 28/11/2022; check.def file version of 28/11/2022

Datablock CuI-Quin\_700GPa - ellipsoid plot
